# Supplementary material for: Characteristics of hospital and health system initiatives to address social determinants of health in the United States: a scoping review of the peer-reviewed literature
Source: Front Public Health. 2024 May 30;12:1413205. doi: 10.3389/fpubh.2024.1413205 (PMC11173975; doi:10.3389/fpubh.2024.1413205)
Supplement: Supplementary file 5 [file Data_Sheet_5.xlsx]

## Sheet: Review Question 1_STEP1
Review Question 1: How have hospitals fared in addressing SDOH vis-a-vis the four-step conceptual ideal?
				Step 1: Collect and organize patient-reported and community level SDOH Data
Record #	Article Name	Author	Year	Step 1a: Gathered data based on needs of care teams (Yes/Not Documented)	Step 1b: Gathered data on provider perspectives on integration of SDOH into workflows (Yes/Not Documented)	Step 1c: Gathered data on patient feelings on collecting SDOH data and including them in EHR (Yes/Not Documented)	Step 1d: Used standardized data collection tool (Yes/Not Documented)	Step 1e: Indicated types of SDOH data collected (Yes/Not Documented)	Step 1f: Indicated frequency of SDOH data collected (Yes/Not Documented)
1	Missed psychosocial risk factors during routine preoperative evaluations are associated with increased complications after elective cancer surgery.	Meyers, Patrick M.; Leeds, Ira L.; Enumah, Zachary O.; Burkhart, Richard A.; He, Jin; Haut, Elliott R.; Efron, Jonathan E.; Johnston, Fabian M.	2019	yes- identified potential candidates and specific medical records	Yes	Not Documented	yes- used individual risk assessment tools and validation tools to record the pyschosocial risk factors	yes- recorded low resourcefullness and other risk factors	yes-documentation of psychosocial risk factors, comorbid disease states, and patient characteristics. The data was collected for the 6 months leading up to the surgery.
2	Outpatient Palliative Care for Noncancer Illnesses: One Program's Experience with Implementation, Impact, and Lessons Learned.	Bischoff, Kara E.; Lin, Joseph; Cohen, Eve; O'Riordan, David L.; Meister, Sarah; Zapata, Carly; Sicotte, Jeffrey; Lindenfeld, Paul; Calton, Brook; Pantilat, Steven Z.	2022	Yes	Yes	Not Documented	Yes	Yes	Yes
3	Financial Incentives for Smoking Cessation in Hospitalized Patients: A Randomized Clinical Trial.	Ladapo, Joseph A.; Tseng, Chi-Hong; Sherman, Scott E.	2020	Not Documented	Not Documented	Not Documented	Yes	Yes	Yes
4	Real-World Disparities in Remote Follow-Up of Cardiac Implantable Electronic Devices and Impact of the COVID-19 Pandemic: A Single-Center Experience.	Lehmann, H. Immo; Sharma, Krishan; Bhatia, Roma; Mills, Theresa; Lang, Joshua; Li, Guoping; Andrews, Carl; Cullivan, Jay; Singh, Jagmeet; Mela, Theofanie	2023	Not Documented	Not Documented	Not Documented	Yes	Yes	Yes
5	Implementing an EHR-based Screening and Referral System to Address Social Determinants of Health in Primary Care.	Buitron de la Vega, Pablo; Losi, Stephanie; Sprague Martinez, Linda; Bovell-Ammon, Allison; Garg, Arvin; James, Thea; Ewen, Alana M.; Stack, Marna; DeCarvalho, Heloisa; Sandel, Megan; Mishuris, Rebecca G.; Deych, Stella; Pelletier, Patrick; Kressin, Nancy R.	2019	Yes	Yes	Yes	Yes	Yes	Yes
6	Documentation and review of social determinants of health data in the EHR: measures and associated insights.	Wang, Michael; Pantell, Matthew S.; Gottlieb, Laura M.; Adler-Milstein, Julia	2021	Yes- They selected 4 different types od data which are to be implemented in EHR	Not documented	Not Documented	The standardized data collection tools included structured fields, codes, questions, and free-text areas within the EHR, which healthcare providers used to record information related to social determinants of health.	Yes	Not Documented
7	Effect of Community Health Workers on 30-Day Hospital Readmissions in an Accountable Care Organization Population: A Randomized Clinical Trial.	Carter, Jocelyn; Hassan, Susan; Walton, Anne; Yu, Liyang; Donelan, Karen; Thorndike, Anne N.	2021	Yes	Yes	Not Documented	Yes	Yes	Yes
8	The impact of enhancing self-management support for diabetes in Community Health Centers through patient engagement and relationship building: a primary care pragmatic cluster-randomized trial.	Hessler, Danielle; Fisher, Lawrence; Dickinson, Miriam; Dickinson, Perry; Parra, José; Potter, Michael B.	2022	Yes	Yes	Yes	Yes	Yes	Yes
9	Online Telehealth Delivery of Group Mental Health Treatment Is Safe, Feasible, and Increases Enrollment and Attendance in Post-9/11 U.S. Veterans.	Fortier, Catherine B.; Currao, Alyssa; Kenna, Alexandra; Kim, Sahra; Beck, Brigitta M.; Katz, Dylan; Hursh, Colleen; Fonda, Jennifer R.	2022	Not Documented	Not Documented	Not Documented	Yes	Yes	Yes
10	Computerized Intervention in Primary Care for Women Veterans with Sexual Assault Histories and Psychosocial Health Risks: a Randomized Clinical Trial.	Creech, Suzannah K.; Pulverman, Carey S.; Kahler, Christopher W.; Orchowski, Lindsay M.; Shea, M. Tracie; Wernette, Golfo Tzilos; Zlotnick, Caron	2022	Not Documented	Not Documented	Not Documented	Yes	Yes	Yes
11	Bridge to Health/Puente a la Salud: a pilot randomized trial to address diabetes self-management and social needs among high-risk patients.	Fitzpatrick, Stephanie L.; Papajorgji-Taylor, Dea; Schneider, Jennifer L.; Lindberg, Nangel; Francisco, Melanie; Smith, Ning; Vaughn, Katie; Vrany, Elizabeth A.; Hill-Briggs, Felicia	2022	Not Documented	Not Documented	Not Documented	Yes	Yes	Yes
12	Impact of a Low-Intensity Resource Referral Intervention on Patients' Knowledge, Beliefs, and Use of Community Resources: Results from the CommunityRx Trial.	Tung, Elizabeth L.; Abramsohn, Emily M.; Boyd, Kelly; Makelarski, Jennifer A.; Beiser, David G.; Chou, Chiahung; Huang, Elbert S.; Ozik, Jonathan; Kaligotla, Chaitanya; Lindau, Stacy Tessler	2020	Not Documented	Not Documented	Not Documented	Yes	Yes; Indicated resource types were derived from 33 evidence-based algorithms developed for common medical and social conditions in the target population.	Yes
13	Patient navigation to address sociolegal barriers for patients with cancer: A comparative-effectiveness study.	Battaglia, Tracy A.; Gunn, Christine M.; Bak, Sharon M.; Flacks, JoHanna; Nelson, Kerrie P.; Wang, Na; Ko, Naomi Y.; Morton, Samantha J.	2022	Not Documented	Not Documented	Not Documented	Yes	Yes	Yes
14	Nurse-led hospital-to-community care, clinical outcomes for people living with HIV and health-related social needs.	Moen, Marik; Doede, Megan; Johantgen, Meg; Taber, Deborah; Adesanya, Ikmat; Werthman, Emily; Friedmann, Erika	2022	Not Documented	Not Documented	Not Documented	Yes	Yes	Yes
15	Improving Diabetes Care Through Population Health Innovations and Payments: Lessons from Western Maryland.	Wang, Gary X.; Gauthier, Richard; Gunter, Kathryn E.; Johnson, Lori; Zhu, Mengqi; Wan, Wen; Tanumihardjo, Jacob P.; Chin, Marshall H.	2023	Yes; Initially, the DMCC met with each patient in the CCR or the primary care provider’s (PCP) office for an intake process, identification of unmet social needs via the WellRx questionnaire, and development of an individualized diabetes management plan.22 After intake, DMCCs initiated referrals for any urgent social needs and collaborated with PCPs and allied team members (e.g., Community Health…	Not Documented	Not documented	Yes; The screening tool was created internally using validated sources including the Arizona Self-Sufficiency Matrix and Accountable Health Communities Health-Related Social Needs Screening Tool and considered factors such as medication regimen, comorbidities, and self-management knowledge (see Appendices A and B for additional information on patient eligibility and screening criteria)	Yes; multiple unmet social needs	Yes
16	Financing Diabetes Care in the U.S. Health System: Payment Innovations for Addressing the Medical and Social Determinants of Health.	Saulsberry, Loren; Peek, Monica	2019	Not Documented	Not Documented	Not Documented	Not Documented	Not Documented	Not Documented
17	Clinical and Sociobehavioral Prediction Model of 30-Day Hospital Readmissions Among People With HIV and Substance Use Disorder: Beyond Electronic Health Record Data.	Nijhawan, Ank E.; Metsch, Lisa R.; Zhang, Song; Feaster, Daniel J.; Gooden, Lauren; Jain, Mamta K.; Walker, Robrina; Huffaker, Shannon; Mugavero, Michael J.; Jacobs, Petra; Armstrong, Wendy S.; Daar, Eric S.; Sullivan, Meg; Del Rio, Carlos; Halm, Ethan A.	2019	Not Documented	Not Documented	Not Documented	Yes	Yes	Yes
18	Effects of a standardized community health worker intervention on hospitalization among disadvantaged patients with multiple chronic conditions: A pooled analysis of three clinical trials.	Vasan, Aditi; Morgan, John W.; Mitra, Nandita; Xu, Chang; Long, Judith A.; Asch, David A.; Kangovi, Shreya	2020	Not Documented	Not Documented	Not Documented	Yes	Yes	Yes
19	Screening for health-related social needs in the emergency department: Adaptability and fidelity during the COVID-19 pandemic.	Murray, Evangelia; Roosevelt, Genie E.; Vogel, Jody A.	2022	Not Documented	Not Documented	Not Documented	Yes	Yes	Yes
20	Food Insecurity in Older Adults in an Integrated Health Care System	Steiner JF, Stenmark SH, Sterrett AT, Paolino AR, Stiefel M, Gozansky WS, Zeng C.	2018	Not Documented	Not Documented	Not Documented	Yes	Yes	Yes
21	Development and Implementation of a Maryland State Program Providing Hospital Payment Incentives for Reduction in Readmission Disparities.	Rice, Kyle; Schuster, Alyson; Pack, Allan; Dougherty, Geoff B.	2023	Not Documented	Not Documented	Not Documented	Not Documented	Not Documented	Not Documented
22	Implementation fidelity to a behavioral diabetes prevention intervention in two New York City safety net primary care practices.	Gupta, Avni; Hu, Jiyuan; Huang, Shengnan; Diaz, Laura; Gore, Radhika; Levy, Natalie; Bergman, Michael; Tanner, Michael; Sherman, Scott E.; Islam, Nadia; Schwartz, Mark D.	2023	Not Documented	Not Documented	Not Documented	Yes	Yes	Yes
23	Implementing CenteringPregnancy Group Prenatal Care for Minority Women Living with HIV at an Urban University Hospital.	Potter, JoNell E.; Duthely, Lunthita M.; Diaz-Mendez, Nelly; Smith, Lindsay; Messick, Barbara J.; Echenique, Maria; Galli, Johnny; Yasin, Salih; Villar-Loubet, Olga	2019	Yes	Yes	Not Documented	Yes	Not Documented	Not Documented
24	Management of Isolated Skull Fractures in Pediatric Patients: A Systematic Review.	Donaldson, Katelyn; Li, Xun; Sartorelli, Kennith H.; Weimersheimer, Peter; Durham, Susan R.	2019	Not Documented	Not Documented	Not Documented	Yes	Not Documented	Not Documented
25	Health Center-Based Community-Supported Agriculture: An RCT.	Berkowitz, Seth A.; O'Neill, Jessica; Sayer, Edward; Shahid, Naysha N.; Petrie, Maegan; Schouboe, Sophie; Saraceno, Megan; Bellin, Rochelle	2019	Not Documented	Not Documented	Not Documented	Yes	Yes	Yes
26	Effects of In-Person Assistance vs Personalized Written Resources About Social Services on Household Social Risks and Child and Caregiver Health: A Randomized Clinical Trial.	Gottlieb, Laura M.; Adler, Nancy E.; Wing, Holly; Velazquez, Denisse; Keeton, Victoria; Romero, Abigail; Hernandez, Maricarmen; Munoz Vera, Andrea; Urrutia Caceres, Elizabeth; Arevalo, Catherine; Herrera, Philip; Bernal Suarez, Mara; Hessler, Danielle	2020	Not Documented	Not Documented	Not Documented	Yes	Yes	Yes
27	Feasibility of a family-centered intervention for depressed older men in primary care.	Hinton, Ladson; La Frano, Erika; Harvey, Danielle; Alfaro, Eduardo Delgadillo; Kravitz, Richard; Smith, Andrew; Apesoa-Varano, Ester Carolina; Jafri, Asma; Unutzer, Jurgen	2019	Not Documented	Not Documented	Not Documented	Yes	Yes	Yes
28	Intensive care management for high-risk veterans in a patient-centered medical home - do some veterans benefit more than others?	Swankoski, Kaylyn E.; Reddy, Ashok; Grembowski, David; Chang, Evelyn T.; Wong, Edwin S.	2023	Not Documented	Not Documented	Not Documented	Yes	Yes	Yes
29	Pragmatic Clinical Trial to Improve Patient Experience Among Adults During Transitions from Hospital to Home: the PArTNER study.	LaBedz, Stephanie L.; Prieto-Centurion, Valentin; Mutso, Amelia; Basu, Sanjib; Bracken, Nina E.; Calhoun, Elizabeth A.; DiDomenico, Robert J.; Joo, Min; Pickard, A. Simon; Pittendrigh, Barry; Williams, Mark V.; Illendula, Sai; Krishnan, Jerry A.	2022	Not Documented	Not Documented	Not Documented	Yes (PROMIS measures)	Yes	Yes
30	Medical-Legal Partnership Effects on Mental Health, Health Care Use, and Quality of Life in Primary Care: A Randomized Clinical Trial.	Liaw, Winston; Northrup, Thomas F.; Stotts, Angela L.; Bakos-Block, Christine; Suchting, Robert; Chen, Alvin; Hernandez, Abigail; Finzetto, Lisandra; Green, Charles; Murphy, Thomas	2023	Not Documented	Not Documented	Not Documented	Yes	Health Harming Legal Needs	Yes
31	Predictive Model-Driven Hotspotting to Decrease Emergency Department Visits: a Randomized Controlled Trial.	Post, Brady; Lapedis, Jeremy; Singh, Karandeep; Valenstein, Paul; Büyüktür, Ayşe G.; Teske, Karin; Ryan, Andrew M.	2021	Not Documented	Not Documented	Not Documented	Not documented; Although Table 1 documents social needs data collected from case workers; a data collection tool is not mentioned	Multiple social needs ; Patients with housing insecurity; low-income patients; patients with mental health and substance abuse disorders	Yes; data is collected just once to inform patient referrals.
32	A care coordinator screening strategy to address health harming legal needs	Berg, Daniel; Setrini, Alice; Chan, Kathy; Cibulskis, Ann; Ameji, Kulsum; Hinami, Keiki	2022	Yes	Yes	Not Documented	Yes	Yes	Yes
33	Evidence that collaborative action between local health departments and nonprofit hospitals helps foster healthy behaviors in communities: a multilevel study	Geri Rosen Cramer; Young, Gary J; Singh, Simone; McGuire, Jean; Kim, Daniel	2021	Not Documented	Yes	Not Documented	Yes	Yes	Not Documented
34	Hospital Partnerships for Population Health: A Systematic Review of the Literature	Hilts Katy Ellis; Yeager, Valerie A; Joseph, Gibson P; Halverson, Paul K; Blackburn, Justin; Menachemi Nir	2021	Not Documented	Not Documented	Not Documented	Yes	Yes	Not Documented
35	Medicaid Investments To Address Social Needs In Oregon And California	Alderwick, Hugh; Hood-Ronick, Carlyn M; Gottlieb, Laura M	2019	Yes	Yes	Yes	Yes	Yes	Not Documented
36	Enabling Services Improve Access To Care, Preventive Services, And Satisfaction Among Health Center Patients	Yue, Dahai; Pourat, Nadereh; Chen, Xiao; Lu, Connie; Zhou, Weihao; Daniel, Marlon; Hoang, Hank; Sripipatana, Alek; Ponce, Ninez A	2019	Not Documented	Not Documented	Not Documented	Yes	Yes	Not Documented
37	A Social-Return-On-Investment Analysis Of Bon Secours Hospital's 'Housing For Health' Affordable Housing Program	Drabo, Emmanuel Fulgence; Eckel, Grace; Ross, Samuel L; Brozic, Michael; Carlton, Chanie G; Warren, Tatiana Y; Kleb, George; Laird, Aurelia; Porter, Keshia M Pollack; Pollack, Craig Evan	2021	Not Documented	Not Documented	Not Documented	Yes	Yes	Yes
38	Embedding Social Workers In Veterans Health Administration Primary Care Teams Reduces Emergency Department Visits	Cornell, Portia Y; Halladay, Christopher W; Ader, Joseph; Halaszynski, Jaime; Hogue, Melinda; McClain, Cristian E; Silva, Jennifer W; Taylor, Laura D; Rudolph, James L	2020	Yes	Not Documented	Not Documented	Yes	Yes	Not Documented
39	Project Nurture Integrates Care And Services To Improve Outcomes For Opioid-Dependent Mothers And Their Children	McConnell, K John; Kaufman, Menolly R; Grunditz, Jenny I; Bellanca, Helen; Risser, Amanda; Rodriguez, Maria I; Renfro, Stephanie	2020	Not Documented	Not Documented	Not Documented	Not Documented	Yes	Yes
40	Addressing the Poverty Barrier in Collaborative Care for Adults Experiencing Homelessness: A Case-Based Report	Cabán-Alemán Carissa; Iobst Saraswati; Luna, Aniuska M; Foster, Adriana	2020	Not Documented	Not Documented	Not Documented	Yes	Yes	Not Documented
41	Interprofessional, multitiered daily rounding management in a high-acuity hospital	Eamranond, Pracha Peter; Bhukhen, Arti; DiPalma, Donna; Schawan Kunuakaphun; Burke, Thomas; Rodis, John; Grey, Michael	2020	Yes	Not Documented	Not Documented	Yes	Not Documented	Not Documented
42	Indianapolis Provider's Use Of Wraparound Services Associated With Reduced Hospitalizations And Emergency Department Visits	Vest, Joshua R; Harris, Lisa E; Haut, Dawn P; Halverson, Paul K; Menachemi, Nir	2018	Yes	Not Documented	Not Documented	Yes	Yes	Yes
43	Reasons for Social Work Referrals in an Urban Safety-Net Population: A Natural Language Processing and Market Basket Analysis Approach.	Bako, Abdulaziz T.; Walter-McCabe, Heather; Kasthurirathne, Suranga N.; Halverson, Paul K.; Vest, Joshua R.	2021	Not Documented	Not Documented	Not Documented	Yes	Yes	Not Documented
44	The Impact of Food Insecurity Screenings and Community Food Resource Referrals for Patients with Type 2 Diabetes.	Ofili, Miriam Ngozi; Lawson, Robin M.	2020	Not Documented	Not Documented	Not Documented	Yes	Yes	Yes
45	The implementation cost of a safety‐net hospital program addressing social needs in Atlanta.	MacLeod, Kara E.; Chapel, John M.; McCurdy, Matthew; Minaya‐Junca, Jasmin; Wirth, Diane; Onwuanyi, Anekwe; Lane, Rashon I.	2021	Not Documented	Not Documented	Not Documented	Yes	Yes	Not Documented
46	Development of a homelessness risk screening tool for emergency department patients.	Doran, Kelly M.; Johns, Eileen; Zuiderveen, Sara; Shinn, Marybeth; Dinan, Kinsey; Schretzman, Maryanne; Gelberg, Lillian; Culhane, Dennis; Shelley, Donna; Mijanovich, Tod	2022	Not Documented	Yes	Not Documented	Yes	Yes	Yes
47	An embedded multiple case study: using CFIR to map clinical food security screening constructs for the development of primary care practice guidelines.	Taher, Sabira; Muramatsu, Naoko; Odoms-Young, Angela; Peacock, Nadine; Michael, C. Fagen; Courtney, K. Suh	2022	Not Documented	Yes	Not Documented	Yes	Yes	Yes
48	Conceptualizing the effective mechanisms of a social needs case management program shown to reduce hospital use: a qualitative study.	Fleming, Mark D.; Safaeinili, Nadia; Knox, Margae; Hernandez, Elizabeth; Esteban, Emily E.; Sarkar, Urmimala; Brewster, Amanda L.	2022	Not Documented	Not Documented	Not Documented	Yes	Not Documented	Yes
49	Social Needs Screening and Referral Program at a Large US Public Hospital System, 2017.	Berry, Carolyn; Paul, Margaret; Massar, Rachel; Marcello, Roopa Kalyanaraman; Krauskopf, Marian	2020	Yes	Yes	Not Documented	Yes	Yes	Not Documented
50	A Nurse-Led Intervention to Address Food Insecurity in Chicago.	Grenier, Jennifer; Wynn, Nicole	2018	Not Documented	Not Documented	Not Documented	Not Documented	Yes	Not Documented
51	Training Student Volunteers as "Community Resource Navigators" to Integrate Health and Social Care in Primary Care.	Gautam, Diwas; Kutzer, Kate; Sandhu, Sahil; Dennis, Erika; Xu, Jacqueline; Blanchard, Lilian; Munoz, Veronica; Drake, Connor; Crowder, Carolyn; Eisenson, Howard; Bettger, Janet	2022	Not Documented	Not Documented	Not Documented	Yes	Not Documented	Yes
52	An In-Clinic Food Pharmacy Addresses Very Low Food Security.	Cooper, Emily; Mohanan, Sveta; Garcia, Christina; Thomas, Tamara Baldwin; Ozgun, Holly; Hernandez, Brisa; Cheng, Iris; Cole, Alisahah J.	2020	Yes	Not Documented	Not Documented	Yes	Yes	Yes
53	Evidence based processes to prevent readmissions: more is better, a ten-site observational study.	Pugh, Jacqueline; Penney, Lauren S.; Noël, Polly H.; Neller, Sean; Mader, Michael; Finley, Erin P.; Lanham, Holly J.; Leykum, Luci	2021	Not Documented	Not Documented	Not Documented	Yes	Yes, unmet social needs; one of the transitional care process best practices was assessing unmet social needs and enlisting social and community supports (home health services, Meals-on-Wheels, day care services, housing, etc.) for post-discharge care	No
54	Unmet Social Needs and No-Show Visits in Primary Care in a US Northeastern Urban Health System, 2018–2019.	Fiori, Kevin P.; Heller, Caroline G.; Rehm, Colin D.; Parsons, Amanda; Flattau, Anna; Braganza, Sandra; Lue, Kelly; Lauria, Molly; Racine, Andrew	2020	Yes	Not Documented	Not Documented	Yes	Yes; 10 unmet social need	Yes
55	Cooling The Hot Spots Where Child Hospitalization Rates Are High: A Neighborhood Approach To Population Health	Beck, Andrew F; Anderson, Kristy L; Rich, Kate; Taylor, Stuart C; Iyer, Srikant B; Kotagal, Uma R; Kahn, Robert S	2019	Yes	Yes	Not Documented	Yes	Yes	Yes
56	Quantifying Health Systems' Investment In Social Determinants Of Health, By Sector, 2017–19	Horwitz, Leora I; Chang, Carol; Arcilla, Harmony N; Knickman, James R	2020	Not Documented	Not Documented	Not Documented	Not Documented	Yes	Not Documented
57	Prescribing Housing: A Scoping Review of Health System Efforts to Address Housing as a Social Determinant of Health.	Koeman, Jamison; Mehdipanah, Roshanak	2021	Not Documented	Not Documented	Not Documented	Not Documented	Yes	Not Documented
58	The Baltimore Community-Based Organizations Neighborhood Network: Enhancing Capacity Together (CONNECT) Cluster RCT.	Wu, Albert W.; Weston, Christine M.; Ibe, Chidinma A.; Ruberman, Claire F.; Bone, Lee; Boonyasai, Romsai T.; Hwang, Sandra; Gentry, Janice; Purnell, Leon; Lu, Yanyan; Liang, Shuwen; Rosenblum, Michael	2019	Not Documented	Not Documented	Not Documented	Not Documented	Not Documented	Not Documented
59	Effect of Community Health Worker Support on Clinical Outcomes of Low-Income Patients Across Primary Care Facilities: A Randomized Clinical Trial.	Kangovi, Shreya; Mitra, Nandita; Norton, Lindsey; Harte, Rory; Zhao, Xinyi; Carter, Tamala; Grande, David; Long, Judith A.	2018	Not Documented	Not Documented	Not Documented	Yes	Yes	Yes
60	Food for Thought: A Randomized Trial of Food Insecurity Screening in the Emergency Department.	Cullen, Danielle; Woodford, Ashley; Fein, Joel	2019	Not Documented	Not Documented	Not Documented	Yes	Yes	Yes
61	Effect of a Peer-Led Behavioral Intervention for Emergency Department Patients at High Risk of Fatal Opioid Overdose: A Randomized Clinical Trial.	Beaudoin, Francesca L.; Jacka, Brendan P.; Li, Yu; Samuels, Elizabeth A.; Hallowell, Benjamin D.; Peachey, Alyssa M.; Newman, Roxxanne A.; Daly, Mackenzie M.; Langdon, Kirsten J.; Marshall, Brandon D. L.	2022	Not Documented	Not Documented	Not Documented	Not Documented	Not Documented	Yes
62	Patient plus partner trial: A randomized controlled trial of 2 interventions to improve outcomes after an initial implantable cardioverter-defibrillator.	Dougherty, Cynthia M.; Thompson, Elaine A.; Kudenchuk, Peter J.	2019	Not Documented	Not Documented	Not documented	Not Documented	Not documented	not documented
63	Illustrating the value of social work: results of an open pilot trial of the psychosocial acuity scale in a large urban pediatric hospital.	Sable, Paige; Ross, Abigail; Clock, Annie; Corder, Brooke; Lamontagne, Nicole; McCaig, Jessica; Shanske, Susan; Tvedte, Matthew; Cummings, Jennifer; Chamorro, Pamela	2021	Yes	Yes	Not documented	Yes	Yes	Not documented
64	Using Publicly Available Data to Understand the Opioid Overdose Epidemic: Geospatial Distribution of Discarded Needles in Boston, Massachusetts	Bearnot, Benjamin, MD; Pearson, John F, MD; Rodriguez, Jorge A, MD	2018	Not Documented	Not Documented	not documented	Not Documented	Not documented	Not Documented
65	Predictors for Poor Linkage to Care Among Hospitalized Persons Living with HIV and Co-Occurring Substance Use Disorder.	Summers, Nathan A.; Colasanti, Jonathan A.; Feaster, Daniel J.; Armstrong, Wendy S.; Rodriguez, Allan; Jain, Mamta K.; Jacobs, Petra; Metsch, Lisa R.; Del Rio, Carlos	2020	Not Documented	Not Documented	not documented	Yes	Yes	Not Documented
66	Enhanced care planning and clinical-community linkages versus usual care to address basic needs of patients with multiple chronic conditions: a clinician-level randomized controlled trial.	Krist, Alex H.; O'Loughlin, Kristen; Woolf, Steven H.; Sabo, Roy T.; Hinesley, Jennifer; Kuzel, Anton J.; Rybarczyk, Bruce D.; Kashiri, Paulette Lail; Brooks, E. Marshall; Glasgow, Russel E.; Huebschmann, Amy G.; Liaw, Winston R.	2020	Not Documented	Not Documented	not documented	Yes	Yes	Not Documented
67	Social Risks Among Primary Care Patients in a Large Urban Health System.	Heller, Caroline G.; Parsons, Amanda S.; Chambers, Earle C.; Fiori, Kevin P.; Rehm, Colin D.	2020	Documented	Yes	Not Documented	Yes	Yes	Not Documented
68	Relationship of Neighborhood Deprivation and Outcomes of a Comprehensive ST-Segment-Elevation Myocardial Infarction Protocol.	Huded, Chetan P.; Dalton, Jarrod E.; Kumar, Anirudh; Krieger, Nikolas I.; Kassis, Nicholas; Phelan, Michael; Kravitz, Kathleen; Reed, Grant W.; Krishnaswamy, Amar; Kapadia, Samir R.; Khot, Umesh	2021	Yes	Not Documented	Not Documented	Yes	Yes (Neighborhood deprivation based on percentiles of the ADI distribution.)	Yes
69	Enhancing Reach Out and Read With a Video and Text Messages: A Randomized Trial in a Low-Income Predominantly Latino Sample.	Jimenez, Manuel E.; Crabtree, Benjamin F.; Hudson, Shawna V.; Mendelsohn, Alan L.; Lima, Daniel; Shelton, Patricia A.; Veras, Julissa; Lin, Yong; Pellerano, Maria; Morrow, Lesley; Strom, Brian L.	2021	Not Documented	Not Documented	Not documented	Yes	Yes	Yes
70	Social Needs Screening in Hospitalized Pediatric Patients: A Randomized Controlled Trial.	Lopez, Michelle A.; Yu, Xian; Hetrick, Rebecca; Raman, Shivani; Lee, Jessica; Hall, Julie; Tran, Katherine; Vonasek, Bryan; Garg, Arvin; Raphael, Jean; Bocchini, Claire	2023	Not Documented	Not Documented	Not Documented	Yes	Yes	Yes

## Sheet: Review Question 1_STEP2
Review Question 1: How have hospitals fared in addressing SDOH compared to the four-step conceptual ideal? (Contd.)
				Step 2: Integrate SDOH Data into Primary Care Workflows
Record #	Article Name	Author	Year	Step 2a: Were SDOH data stored and presented in EHRs? (Yes/Not Documented)	Step 2b: Were reports or summaries of SDOH data created? (Yes/Not Documented)	Step 2c: Were community-level SDOH data included in EHR? (Yes/Not Documented)	Step 2d: Were patient-level SDOH data shared with the care team? (Yes/Not Documented)	Step 2e: Did the care team discuss SDOH results with patients? (Yes/Not Documented)	Step 2f: Was a list of community resources used to facilitate referrals? (Yes/Not Documented)	Step 2g: Was a protocol used for referrals? (Yes/Not Documented)	Step 2h: Were patient referral practices discussed? (Yes/Not Documented)	Step 2i: Were referrals tracked? (Yes/Not Documented)	Step 2j: Were protocols developed on use of community-level SDOH data for referrals and patient management? (Yes/Not Documented)
1	Missed psychosocial risk factors during routine preoperative evaluations are associated with increased complications after elective cancer surgery.	Meyers, Patrick M.; Leeds, Ira L.; Enumah, Zachary O.; Burkhart, Richard A.; He, Jin; Haut, Elliott R.; Efron, Jonathan E.; Johnston, Fabian M.	2019	yes-performed a manual chart review for documentation of the same psychosocial risk factors, comorbid disease states, and patient characteristics within the electronic medical record (Epic Systems, Verona, WI).	Yes	Not Documented	Not Documented	Not Documented	Not Documented	Not Documented	audited chart abstracting for accuracy with 10% of cases randomly selected by a second reviewer (Z.O.E.) and comparison of abstracted data to institutionally abstracted National Surgical Quality Improvement Program case entries.	yes- pre and post operative	Not Documented
2	Outpatient Palliative Care for Noncancer Illnesses: One Program's Experience with Implementation, Impact, and Lessons Learned.	Bischoff, Kara E.; Lin, Joseph; Cohen, Eve; O'Riordan, David L.; Meister, Sarah; Zapata, Carly; Sicotte, Jeffrey; Lindenfeld, Paul; Calton, Brook; Pantilat, Steven Z.	2022	Yes	Yes	Not documented	Yes	Yes	Yes (referrals to the outpatient palliative care service from specialist practices in the community)	Yes	Yes	Yes	Not documented
3	Financial Incentives for Smoking Cessation in Hospitalized Patients: A Randomized Clinical Trial.	Ladapo, Joseph A.; Tseng, Chi-Hong; Sherman, Scott E.	2020	Not Documented	Yes	Not documented	Not Documented	Not documented	Yes	Yes	Yes	Yes	Not documented
4	Real-World Disparities in Remote Follow-Up of Cardiac Implantable Electronic Devices and Impact of the COVID-19 Pandemic: A Single-Center Experience.	Lehmann, H. Immo; Sharma, Krishan; Bhatia, Roma; Mills, Theresa; Lang, Joshua; Li, Guoping; Andrews, Carl; Cullivan, Jay; Singh, Jagmeet; Mela, Theofanie	2023	Yes	Yes	Not documented	Not documented	Not documented	Not documented	Not documented	Not documented	Not documented	Not documented
5	Implementing an EHR-based Screening and Referral System to Address Social Determinants of Health in Primary Care.	Buitron de la Vega, Pablo; Losi, Stephanie; Sprague Martinez, Linda; Bovell-Ammon, Allison; Garg, Arvin; James, Thea; Ewen, Alana M.; Stack, Marna; DeCarvalho, Heloisa; Sandel, Megan; Mishuris, Rebecca G.; Deych, Stella; Pelletier, Patrick; Kressin, Nancy R.	2019	Yes	Yes	Yes	Yes	Yes	Yes	Yes	Yes	Yes	Yes
6	Documentation and review of social determinants of health data in the EHR: measures and associated insights.	Wang, Michael; Pantell, Matthew S.; Gottlieb, Laura M.; Adler-Milstein, Julia	2021	Yes	Yes	Not Documented	Not Documented	Not Documented	Not Documented	Not Documented	Not Documented	Not Documented	Not Documented
7	Effect of Community Health Workers on 30-Day Hospital Readmissions in an Accountable Care Organization Population: A Randomized Clinical Trial.	Carter, Jocelyn; Hassan, Susan; Walton, Anne; Yu, Liyang; Donelan, Karen; Thorndike, Anne N.	2021	Yes; CHWs documented all encounters in the electronic medical record (EMR) (eg, enrollment notes, progress notes for in-person visits and telephone calls); all patient and care team interactions were documented by CHWs in a REDCap database (Vanderbilt University). Each patient’s clinical team members were copied on all CHW EMR notes and contacted directly by CHWs during the intervention when need…	Yes	Not documented	Yes	Not documented	Yes	Not documented	Not documented	Not documented	Not documented
8	The impact of enhancing self-management support for diabetes in Community Health Centers through patient engagement and relationship building: a primary care pragmatic cluster-randomized trial.	Hessler, Danielle; Fisher, Lawrence; Dickinson, Miriam; Dickinson, Perry; Parra, José; Potter, Michael B.	2022	Not Documented	Yes	Not documented	Yes	Yes	Yes	Not documented	Not documented	Not documented	Not documented
9	Online Telehealth Delivery of Group Mental Health Treatment Is Safe, Feasible, and Increases Enrollment and Attendance in Post-9/11 U.S. Veterans.	Fortier, Catherine B.; Currao, Alyssa; Kenna, Alexandra; Kim, Sahra; Beck, Brigitta M.; Katz, Dylan; Hursh, Colleen; Fonda, Jennifer R.	2022	Not Documented	Yes	Not documented	Yes	Yes	Not documented; (The intervention was the STEP home workshop to facilitate veteran reintegration to civil life); An interdisciplinary team delievered the workshop in-person or through telemedicine and it appears all documentation related to thos workshop and results were independent of the EHR system	Not documented	Not documented	Not documented	Not documented
10	Computerized Intervention in Primary Care for Women Veterans with Sexual Assault Histories and Psychosocial Health Risks: a Randomized Clinical Trial.	Creech, Suzannah K.; Pulverman, Carey S.; Kahler, Christopher W.; Orchowski, Lindsay M.; Shea, M. Tracie; Wernette, Golfo Tzilos; Zlotnick, Caron	2022	Not Documented	Not Documented	Not Documented	Not Documented	Not Documented	Not Documented	Not Documented	Not Documented	Not Documented	Not Documented
11	Bridge to Health/Puente a la Salud: a pilot randomized trial to address diabetes self-management and social needs among high-risk patients.	Fitzpatrick, Stephanie L.; Papajorgji-Taylor, Dea; Schneider, Jennifer L.; Lindberg, Nangel; Francisco, Melanie; Smith, Ning; Vaughn, Katie; Vrany, Elizabeth A.; Hill-Briggs, Felicia	2022	Not Documented	Yes	Not documented	Not documented	Not documented	Yes	Yes	Yes	Yes	Not documented
12	Impact of a Low-Intensity Resource Referral Intervention on Patients' Knowledge, Beliefs, and Use of Community Resources: Results from the CommunityRx Trial.	Tung, Elizabeth L.; Abramsohn, Emily M.; Boyd, Kelly; Makelarski, Jennifer A.; Beiser, David G.; Chou, Chiahung; Huang, Elbert S.; Ozik, Jonathan; Kaligotla, Chaitanya; Lindau, Stacy Tessler	2020	Yes	Yes	Yes	Yes	Yes	Yes	Yes	Yes	Not documented	Yes
13	Patient navigation to address sociolegal barriers for patients with cancer: A comparative-effectiveness study.	Battaglia, Tracy A.; Gunn, Christine M.; Bak, Sharon M.; Flacks, JoHanna; Nelson, Kerrie P.; Wang, Na; Ko, Naomi Y.; Morton, Samantha J.	2022	Not Documented	Yes	Not documented	Yes	Yes	Yes	Yes	Yes; the main intrevention was a enhanced navigation system to help patients address socio-legal barriers	Yes	Not documented
14	Nurse-led hospital-to-community care, clinical outcomes for people living with HIV and health-related social needs	Moen, Marik; Doede, Megan; Johantgen, Meg; Taber, Deborah; Adesanya, Ikmat; Werthman, Emily; Friedmann, Erika	2022	Yes	Yes	Not Documented	Yes	Yes	Yes	Yes	Yes	Yes	Not Documented
15	Improving Diabetes Care Through Population Health Innovations and Payments: Lessons from Western Maryland.	Wang, Gary X.; Gauthier, Richard; Gunter, Kathryn E.; Johnson, Lori; Zhu, Mengqi; Wan, Wen; Tanumihardjo, Jacob P.; Chin, Marshall H.	2023	Yes; through WellRx questionnaire, a validated screening tool for SDOH	Yes	Not documented	Yes	Yes	Yes	Yes	Yes	Not documented	Not documented
16	Financing Diabetes Care in the U.S. Health System: Payment Innovations for Addressing the Medical and Social Determinants of Health.	Saulsberry, Loren; Peek, Monica	2019	discusses the importance of integrating social determinants of health (SDOH) data into electronic health records (EHRs) and medical claims to support timely interventions and informed population health initiatives.	Not Documented	Not Documented	Not Documented	Not Documented	Not Documented	Not Documented	Not Documented	Not Documented	Not Documented
17	Clinical and Sociobehavioral Prediction Model of 30-Day Hospital Readmissions Among People With HIV and Substance Use Disorder: Beyond Electronic Health Record Data.	Nijhawan, Ank E.; Metsch, Lisa R.; Zhang, Song; Feaster, Daniel J.; Gooden, Lauren; Jain, Mamta K.; Walker, Robrina; Huffaker, Shannon; Mugavero, Michael J.; Jacobs, Petra; Armstrong, Wendy S.; Daar, Eric S.; Sullivan, Meg; Del Rio, Carlos; Halm, Ethan A.	2019	Yes	Yes	Not Documented	Not Documented	Not Documented	Not Documented	Not Documented	Not Documented	Not Documented	Not Documented
18	Effects of a standardized community health worker intervention on hospitalization among disadvantaged patients with multiple chronic conditions: A pooled analysis of three clinical trials.	Vasan, Aditi; Morgan, John W.; Mitra, Nandita; Xu, Chang; Long, Judith A.; Asch, David A.; Kangovi, Shreya	2020	Not Documented	Yes	Not documented	Not documented	Not documented	Not documented	Not documented	Not documented	Not documented	Not documented
19	Screening for health-related social needs in the emergency department: Adaptability and fidelity during the COVID-19 pandemic.	Murray, Evangelia; Roosevelt, Genie E.; Vogel, Jody A.	2022	Yes	Yes	Not Documented	Not Documented	Not Documented	Yes	Yes	Yes	Not Documented	Not Documented
20	Food Insecurity in Older Adults in an Integrated Health Care System	Steiner JF, Stenmark SH, Sterrett AT, Paolino AR, Stiefel M, Gozansky WS, Zeng C.	2018	Not Documented	Not Documented	Not Documented	Not Documented	Not Documented	Not Documented	Not Documented	Not Documented	Not Documented	Not Documented
21	Development and Implementation of a Maryland State Program Providing Hospital Payment Incentives for Reduction in Readmission Disparities.	Rice, Kyle; Schuster, Alyson; Pack, Allan; Dougherty, Geoff B.	2023	Not Documented	Not Documented	Not Documented	Not Documented	Not Documented	Not Documented	Not Documented	Not Documented	Not Documented	Not Documented
22	Implementation fidelity to a behavioral diabetes prevention intervention in two New York City safety net primary care practices.	Gupta, Avni; Hu, Jiyuan; Huang, Shengnan; Diaz, Laura; Gore, Radhika; Levy, Natalie; Bergman, Michael; Tanner, Michael; Sherman, Scott E.; Islam, Nadia; Schwartz, Mark D.	2023	Not Documented	Yes	Not documented	Not documented	Yes	Yes	Not documented	Not documented	Not documented	Not documented
23	Implementing CenteringPregnancy Group Prenatal Care for Minority Women Living with HIV at an Urban University Hospital.	Potter, JoNell E.; Duthely, Lunthita M.; Diaz-Mendez, Nelly; Smith, Lindsay; Messick, Barbara J.; Echenique, Maria; Galli, Johnny; Yasin, Salih; Villar-Loubet, Olga	2019	Yes	Yes	Not Documented	Yes	Not Documented	Not Documented	Not Documented	Not Documented	Not Documented	Not Documented
24	Management of Isolated Skull Fractures in Pediatric Patients: A Systematic Review.	Donaldson, Katelyn; Li, Xun; Sartorelli, Kennith H.; Weimersheimer, Peter; Durham, Susan R.	2019	Not Documented	Yes	Not Documented	Yes	Not Documented	Not Documented	Not Documented	Not Documented	Not Documented	Not Documented
25	Health Center-Based Community-Supported Agriculture: An RCT.	Berkowitz, Seth A.; O'Neill, Jessica; Sayer, Edward; Shahid, Naysha N.; Petrie, Maegan; Schouboe, Sophie; Saraceno, Megan; Bellin, Rochelle	2019	Not Documented	Yes	Not documented	Not documented	Not documented	Yes (intervention consisted of community-supported agriculture); EHR was used minimally; only at the time of recruitment from community based on BMI	Not documented	Not documented	Not documented	Not documented
26	Effects of In-Person Assistance vs Personalized Written Resources About Social Services on Household Social Risks and Child and Caregiver Health: A Randomized Clinical Trial.	Gottlieb, Laura M.; Adler, Nancy E.; Wing, Holly; Velazquez, Denisse; Keeton, Victoria; Romero, Abigail; Hernandez, Maricarmen; Munoz Vera, Andrea; Urrutia Caceres, Elizabeth; Arevalo, Catherine; Herrera, Philip; Bernal Suarez, Mara; Hessler, Danielle	2020	Not Documented	Yes	Not documented	Not documented	Not documented	Yes (Navigators used lists of community based resources)	Not documented	Not documented	Not documented	Not documented
27	Feasibility of a family-centered intervention for depressed older men in primary care.	Hinton, Ladson; La Frano, Erika; Harvey, Danielle; Alfaro, Eduardo Delgadillo; Kravitz, Richard; Smith, Andrew; Apesoa-Varano, Ester Carolina; Jafri, Asma; Unutzer, Jurgen	2019	Not Documented	Yes	Not documented	Not documented	Not documented	Not documented	Not documented	Not documented	Not documented	Not documented
28	Intensive care management for high-risk veterans in a patient-centered medical home - do some veterans benefit more than others?	Swankoski, Kaylyn E.; Reddy, Ashok; Grembowski, David; Chang, Evelyn T.; Wong, Edwin S.	2023	Not Documented	Yes	Not documented	Not documented	Not documented	Not documented	Not documented	Not documented	Not documented	Not documented
29	Pragmatic Clinical Trial to Improve Patient Experience Among Adults During Transitions from Hospital to Home: the PArTNER study.	LaBedz, Stephanie L.; Prieto-Centurion, Valentin; Mutso, Amelia; Basu, Sanjib; Bracken, Nina E.; Calhoun, Elizabeth A.; DiDomenico, Robert J.; Joo, Min; Pickard, A. Simon; Pittendrigh, Barry; Williams, Mark V.; Illendula, Sai; Krishnan, Jerry A.	2022	Not Documented	Yes	Not documented	Yes	Yes	Yes	Not documented	Not documented	Not documented	Not documented
30	Medical-Legal Partnership Effects on Mental Health, Health Care Use, and Quality of Life in Primary Care: A Randomized Clinical Trial.	Liaw, Winston; Northrup, Thomas F.; Stotts, Angela L.; Bakos-Block, Christine; Suchting, Robert; Chen, Alvin; Hernandez, Abigail; Finzetto, Lisandra; Green, Charles; Murphy, Thomas	2023	Not Documented (REDCAP used to conduct screening and perform randomization and collect study data)	Yes	Not documented	Yes	Not documented	Yes	Yes	Not documented	Yes	Not documented
31	Predictive Model-Driven Hotspotting to Decrease Emergency Department Visits: a Randomized Controlled Trial.	Post, Brady; Lapedis, Jeremy; Singh, Karandeep; Valenstein, Paul; Büyüktür, Ayşe G.; Teske, Karin; Ryan, Andrew M.	2021	Not doumented; EHR was used for patient identification, predictive modeling and randomization; social needs were collected separately by case workers	Yes	Not documented	Yes, case workers	Yes; social needs were elicited directly from patients by case workers	Yes	Not documented	Not documented	Not documented	Not documented
32	A care coordinator screening strategy to address health harming legal needs	Berg, Daniel; Setrini, Alice; Chan, Kathy; Cibulskis, Ann; Ameji, Kulsum; Hinami, Keiki	2022	Not Documented	Yes	Not Documented	Yes	Not Documented	Not Documented	Yes	Yes	Yes	Yes
33	Evidence that collaborative action between local health departments and nonprofit hospitals helps foster healthy behaviors in communities: a multilevel study	Geri Rosen Cramer; Young, Gary J; Singh, Simone; McGuire, Jean; Kim, Daniel	2021	Not Documented	Yes	Not Documented	Not Documented	Not Documented	Not Documented	Not Documented	Not Documented	Not Documented	Not Documented
34	Hospital Partnerships for Population Health: A Systematic Review of the Literature	Hilts Katy Ellis; Yeager, Valerie A; Joseph, Gibson P; Halverson, Paul K; Blackburn, Justin; Menachemi Nir	2021	Not Documented	Yes	Not Documented	Not Documented	Not Documented	Not Documented	Not Documented	Not Documented	Not Documented	Not Documented
35	Medicaid Investments To Address Social Needs In Oregon And California	Alderwick, Hugh; Hood-Ronick, Carlyn M; Gottlieb, Laura M	2019	Not Documented	Not Documented	Not Documented	Not Documented	Not Documented	Not Documented	Not Documented	Not Documented	Not Documented	Not Documented
36	Enabling Services Improve Access To Care, Preventive Services, And Satisfaction Among Health Center Patients	Yue, Dahai; Pourat, Nadereh; Chen, Xiao; Lu, Connie; Zhou, Weihao; Daniel, Marlon; Hoang, Hank; Sripipatana, Alek; Ponce, Ninez A	2019	Not Documented	Yes	Not Documented	Not Documented	Not Documented	Not Documented	Not Documented	Not Documented	Not Documented	Not Documented
37	A Social-Return-On-Investment Analysis Of Bon Secours Hospital's 'Housing For Health' Affordable Housing Program	Drabo, Emmanuel Fulgence; Eckel, Grace; Ross, Samuel L; Brozic, Michael; Carlton, Chanie G; Warren, Tatiana Y; Kleb, George; Laird, Aurelia; Porter, Keshia M Pollack; Pollack, Craig Evan	2021	Not Documented	Not Documented	Not Documented	Not Documented	Not Documented	Not Documented	Not Documented	Not Documented	Not Documented	Not Documented
38	Embedding Social Workers In Veterans Health Administration Primary Care Teams Reduces Emergency Department Visits	Cornell, Portia Y; Halladay, Christopher W; Ader, Joseph; Halaszynski, Jaime; Hogue, Melinda; McClain, Cristian E; Silva, Jennifer W; Taylor, Laura D; Rudolph, James L	2020	Yes	Yes	Yes	Yes	Not Documented	Not Documented	Not Documented	Not Documented	Not Documented	Not Documented
39	Project Nurture Integrates Care And Services To Improve Outcomes For Opioid-Dependent Mothers And Their Children	McConnell, K John; Kaufman, Menolly R; Grunditz, Jenny I; Bellanca, Helen; Risser, Amanda; Rodriguez, Maria I; Renfro, Stephanie	2020	Not Documented	Yes	Not Documented	Yes	Not Documented	Yes	Yes	Yes	Not Documented	Not Documented
40	Addressing the Poverty Barrier in Collaborative Care for Adults Experiencing Homelessness: A Case-Based Report	Cabán-Alemán Carissa; Iobst Saraswati; Luna, Aniuska M; Foster, Adriana	2020	Not Documented	Yes	Not Documented	Yes	Yes	Yes	Yes	Yes	Yes	Not Documented
41	Interprofessional, multitiered daily rounding management in a high-acuity hospital	Eamranond, Pracha Peter; Bhukhen, Arti; DiPalma, Donna; Schawan Kunuakaphun; Burke, Thomas; Rodis, John; Grey, Michael	2020	Not Documented	Not Documented	Not Documented	Not Documented	Not Documented	Not Documented	Not Documented	Not Documented	Not Documented	Not Documented
42	Indianapolis Provider's Use Of Wraparound Services Associated With Reduced Hospitalizations And Emergency Department Visits	Vest, Joshua R; Harris, Lisa E; Haut, Dawn P; Halverson, Paul K; Menachemi, Nir	2018	Yes	Yes	Not Documented	Yes	Not Documented	Yes	Yes	Yes	Not Documented	Not Documented
43	Reasons for Social Work Referrals in an Urban Safety-Net Population: A Natural Language Processing and Market Basket Analysis Approach.	Bako, Abdulaziz T.; Walter-McCabe, Heather; Kasthurirathne, Suranga N.; Halverson, Paul K.; Vest, Joshua R.	2021	Yes	Yes	Not Documented	Yes	Yes	Not Documented	Yes	Yes	Not Documented	Not Documented
44	The Impact of Food Insecurity Screenings and Community Food Resource Referrals for Patients with Type 2 Diabetes.	Ofili, Miriam Ngozi; Lawson, Robin M.	2020	Yes	Yes	Not Documented	Yes	Yes	Yes	Yes	Yes	Yes	Not Documented
45	The implementation cost of a safety‐net hospital program addressing social needs in Atlanta.	MacLeod, Kara E.; Chapel, John M.; McCurdy, Matthew; Minaya‐Junca, Jasmin; Wirth, Diane; Onwuanyi, Anekwe; Lane, Rashon I.	2021	Not Documented	Yes	Not Documented	Yes	Yes	Not Documented	Not Documented	Not Documented	Not Documented	Not Documented
46	Development of a homelessness risk screening tool for emergency department patients.	Doran, Kelly M.; Johns, Eileen; Zuiderveen, Sara; Shinn, Marybeth; Dinan, Kinsey; Schretzman, Maryanne; Gelberg, Lillian; Culhane, Dennis; Shelley, Donna; Mijanovich, Tod	2022	Not Documented	Yes	Not Documented	Not Documented	Not Documented	Not Documented	Not Documented	Not Documented	Not Documented	Not Documented
47	An embedded multiple case study: using CFIR to map clinical food security screening constructs for the development of primary care practice guidelines.	Taher, Sabira; Muramatsu, Naoko; Odoms-Young, Angela; Peacock, Nadine; Michael, C. Fagen; Courtney, K. Suh	2022	Yes	Yes	Not Documented	Yes	Yes	Yes	Yes	Yes	Yes	Not Documented
48	Conceptualizing the effective mechanisms of a social needs case management program shown to reduce hospital use: a qualitative study.	Fleming, Mark D.; Safaeinili, Nadia; Knox, Margae; Hernandez, Elizabeth; Esteban, Emily E.; Sarkar, Urmimala; Brewster, Amanda L.	2022	Yes	Yes	Not Documented	Yes	Yes	Yes	Not Documented	Not Documented	Not Documented	Not Documented
49	Social Needs Screening and Referral Program at a Large US Public Hospital System, 2017.	Berry, Carolyn; Paul, Margaret; Massar, Rachel; Marcello, Roopa Kalyanaraman; Krauskopf, Marian	2020	Yes	Yes	Not Documented	Yes	Yes	Yes	Yes	Not Documented	Yes	Not Documented
50	A Nurse-Led Intervention to Address Food Insecurity in Chicago.	Grenier, Jennifer; Wynn, Nicole	2018	Not Documented	Not Documented	Not Documented	Not Documented	Not Documented	Not Documented	Not Documented	Not Documented	Not Documented	Not Documented
51	Training Student Volunteers as "Community Resource Navigators" to Integrate Health and Social Care in Primary Care.	Gautam, Diwas; Kutzer, Kate; Sandhu, Sahil; Dennis, Erika; Xu, Jacqueline; Blanchard, Lilian; Munoz, Veronica; Drake, Connor; Crowder, Carolyn; Eisenson, Howard; Bettger, Janet	2022	Not Documented	Yes	Not Documented	Not Documented	Not Documented	Yes	Yes	Yes	Yes	Not Documented
52	An In-Clinic Food Pharmacy Addresses Very Low Food Security.	Cooper, Emily; Mohanan, Sveta; Garcia, Christina; Thomas, Tamara Baldwin; Ozgun, Holly; Hernandez, Brisa; Cheng, Iris; Cole, Alisahah J.	2020	Yes	Not Documented	Not Documented	Yes	Yes	Yes	Yes	Yes	Not Documented	Not Documented
53	Evidence based processes to prevent readmissions: more is better, a ten-site observational study.	Pugh, Jacqueline; Penney, Lauren S.; Noël, Polly H.; Neller, Sean; Mader, Michael; Finley, Erin P.; Lanham, Holly J.; Leykum, Luci	2021	Not documented	Yes	Not documented	Not documented	Not documented	No	Not documented	Not documented	Not documented	Not documented
54	Unmet Social Needs and No-Show Visits in Primary Care in a US Northeastern Urban Health System, 2018–2019.	Fiori, Kevin P.; Heller, Caroline G.; Rehm, Colin D.; Parsons, Amanda; Flattau, Anna; Braganza, Sandra; Lue, Kelly; Lauria, Molly; Racine, Andrew	2020	Yes	Yes	Not documented	Yes	Yes	Yes	Not documented	Not documented	Not documented	Not documented
55	Cooling The Hot Spots Where Child Hospitalization Rates Are High: A Neighborhood Approach To Population Health	Beck, Andrew F; Anderson, Kristy L; Rich, Kate; Taylor, Stuart C; Iyer, Srikant B; Kotagal, Uma R; Kahn, Robert S	2019	Yes	Yes; discussed but not reported	Yes; speaks of data overlay	Yes	Yes	Yes	Not documented	Not documented	Not documented	Not documented
56	Quantifying Health Systems' Investment In Social Determinants Of Health, By Sector, 2017–19	Horwitz, Leora I; Chang, Carol; Arcilla, Harmony N; Knickman, James R	2020	Not Documented	Not Documented	Not Documented	Not Documented	Not Documented	Not Documented	Not Documented	Not Documented	Not Documented	Not Documented
57	Prescribing Housing: A Scoping Review of Health System Efforts to Address Housing as a Social Determinant of Health.	Koeman, Jamison; Mehdipanah, Roshanak	2021	Not Documented	Not Documented	Not Documented	Not Documented	Not Documented	Not Documented	Not Documented	Not Documented	Not Documented	Not Documented
58	The Baltimore Community-Based Organizations Neighborhood Network: Enhancing Capacity Together (CONNECT) Cluster RCT.	Wu, Albert W.; Weston, Christine M.; Ibe, Chidinma A.; Ruberman, Claire F.; Bone, Lee; Boonyasai, Romsai T.; Hwang, Sandra; Gentry, Janice; Purnell, Leon; Lu, Yanyan; Liang, Shuwen; Rosenblum, Michael	2019	Not Documented	Not Documented	Not Documented	Not Documented	Not Documented	Not Documented	Not Documented	Not Documented	Not Documented	Not Documented
59	Effect of Community Health Worker Support on Clinical Outcomes of Low-Income Patients Across Primary Care Facilities: A Randomized Clinical Trial.	Kangovi, Shreya; Mitra, Nandita; Norton, Lindsey; Harte, Rory; Zhao, Xinyi; Carter, Tamala; Grande, David; Long, Judith A.	2018	Not Documented	Not Documented	Not Documented	Not Documented	Not Documented	Not Documented	Not Documented	Not Documented	Not Documented	Not Documented
60	Food for Thought: A Randomized Trial of Food Insecurity Screening in the Emergency Department.	Cullen, Danielle; Woodford, Ashley; Fein, Joel	2019	Not Documented	Not Documented	Not Documented	Not Documented	Not Documented	Not Documented	Not Documented	Not Documented	Not Documented	Not Documented
61	Effect of a Peer-Led Behavioral Intervention for Emergency Department Patients at High Risk of Fatal Opioid Overdose: A Randomized Clinical Trial.	Beaudoin, Francesca L.; Jacka, Brendan P.; Li, Yu; Samuels, Elizabeth A.; Hallowell, Benjamin D.; Peachey, Alyssa M.; Newman, Roxxanne A.; Daly, Mackenzie M.; Langdon, Kirsten J.; Marshall, Brandon D. L.	2022	Not Documented	Not Documented	not documented	Not Documented	Not documented	Not Documented	Not Documented	Not Documented	Not Documented	Not Documented
62	Patient plus partner trial: A randomized controlled trial of 2 interventions to improve outcomes after an initial implantable cardioverter-defibrillator.	Dougherty, Cynthia M.; Thompson, Elaine A.; Kudenchuk, Peter J.	2019	Not Documented	Not documented	Not documented	Not Documented	Not Documented	Not Documented	Not Documented	Not documented	Not documented	Yes
63	Illustrating the value of social work: results of an open pilot trial of the psychosocial acuity scale in a large urban pediatric hospital.	Sable, Paige; Ross, Abigail; Clock, Annie; Corder, Brooke; Lamontagne, Nicole; McCaig, Jessica; Shanske, Susan; Tvedte, Matthew; Cummings, Jennifer; Chamorro, Pamela	2021	Yes	Not documented	Not documented	Yes	Not Documented	Not Documented	Not Documented	Not Documented	Not Documented	Not Documented
64	Using Publicly Available Data to Understand the Opioid Overdose Epidemic: Geospatial Distribution of Discarded Needles in Boston, Massachusetts	Bearnot, Benjamin, MD; Pearson, John F, MD; Rodriguez, Jorge A, MD	2018	Not Documented	Not Documented	not documented	Not Documented	Not documented	Not Documented	Not Documented	Not Documented	Not Documented	Not Documented
65	Predictors for Poor Linkage to Care Among Hospitalized Persons Living with HIV and Co-Occurring Substance Use Disorder.	Summers, Nathan A.; Colasanti, Jonathan A.; Feaster, Daniel J.; Armstrong, Wendy S.; Rodriguez, Allan; Jain, Mamta K.; Jacobs, Petra; Metsch, Lisa R.; Del Rio, Carlos	2020	Not Documented	Not Documented	not documented	Not Documented	Not documented	Not Documented	Not Documented	Not Documented	Not Documented	Not Documented
66	Enhanced care planning and clinical-community linkages versus usual care to address basic needs of patients with multiple chronic conditions: a clinician-level randomized controlled trial.	Krist, Alex H.; O'Loughlin, Kristen; Woolf, Steven H.; Sabo, Roy T.; Hinesley, Jennifer; Kuzel, Anton J.; Rybarczyk, Bruce D.; Kashiri, Paulette Lail; Brooks, E. Marshall; Glasgow, Russel E.; Huebschmann, Amy G.; Liaw, Winston R.	2020	Not Documented	Not Documented	not documented	Not Documented	Not documented	Not Documented	Not Documented	Not Documented	Not Documented	Not Documented
67	Social Risks Among Primary Care Patients in a Large Urban Health System.	Heller, Caroline G.; Parsons, Amanda S.; Chambers, Earle C.; Fiori, Kevin P.; Rehm, Colin D.	2020	Yes	Yes	Yes	Yes	Yes	Yes	Not Documented	Not Documented	Not documented	Not Documented
68	Relationship of Neighborhood Deprivation and Outcomes of a Comprehensive ST-Segment-Elevation Myocardial Infarction Protocol.	Huded, Chetan P.; Dalton, Jarrod E.; Kumar, Anirudh; Krieger, Nikolas I.; Kassis, Nicholas; Phelan, Michael; Kravitz, Kathleen; Reed, Grant W.; Krishnaswamy, Amar; Kapadia, Samir R.; Khot, Umesh	2021	Not documented	Not Documented	Not Documented	Yes	Not Documented	Not Documented	Not Documented	Not documented	Not documented	Not Documented
69	Enhancing Reach Out and Read With a Video and Text Messages: A Randomized Trial in a Low-Income Predominantly Latino Sample.	Jimenez, Manuel E.; Crabtree, Benjamin F.; Hudson, Shawna V.; Mendelsohn, Alan L.; Lima, Daniel; Shelton, Patricia A.; Veras, Julissa; Lin, Yong; Pellerano, Maria; Morrow, Lesley; Strom, Brian L.	2021	Not Documented	Not documented	Not documented	Not Documented	Not Documented	Not Documented	Not Documented	Not Documented	Not Documented	Not Documented
70	Social Needs Screening in Hospitalized Pediatric Patients: A Randomized Controlled Trial.	Lopez, Michelle A.; Yu, Xian; Hetrick, Rebecca; Raman, Shivani; Lee, Jessica; Hall, Julie; Tran, Katherine; Vonasek, Bryan; Garg, Arvin; Raphael, Jean; Bocchini, Claire	2023	Not Documented	Yes	Not Documented	Not Documented	Not Documented	Yes	Yes	Yes	Yes	Not Documented

## Sheet: Review Question 1_STEP3
Review Question 1: How have hospitals fared in addressing SDOH compared to the four-step conceptual ideal? (Contd.)
				Step 3 : Develop EHR-based automated support and action based on SDOH data
Record #	Article Name	Author	Year	Step 3a: Were staffing models and training resources developed in EHR? (Yes/Not Documented)	Step 3b: Did the EHR-based tool include automated triggers or alerts? (Yes/Not Documented)	Step 3c: Were referral tracking tools included in EHR? (Yes/Not Documented)	Step 3d: Were community resource lists integrated with the EHR? (Yes/Not Documented)
1	Missed psychosocial risk factors during routine preoperative evaluations are associated with increased complications after elective cancer surgery.	Meyers, Patrick M.; Leeds, Ira L.; Enumah, Zachary O.; Burkhart, Richard A.; He, Jin; Haut, Elliott R.; Efron, Jonathan E.; Johnston, Fabian M.	2019	Not Documented	Not Documented	Not Documented	Not Documented
2	Outpatient Palliative Care for Noncancer Illnesses: One Program's Experience with Implementation, Impact, and Lessons Learned.	Bischoff, Kara E.; Lin, Joseph; Cohen, Eve; O'Riordan, David L.; Meister, Sarah; Zapata, Carly; Sicotte, Jeffrey; Lindenfeld, Paul; Calton, Brook; Pantilat, Steven Z.	2022	Not Documented	Yes	Yes	Not Documented
3	Financial Incentives for Smoking Cessation in Hospitalized Patients: A Randomized Clinical Trial.	Ladapo, Joseph A.; Tseng, Chi-Hong; Sherman, Scott E.	2020	Not Documented	Not Documented	Yes	Not Documented
4	Real-World Disparities in Remote Follow-Up of Cardiac Implantable Electronic Devices and Impact of the COVID-19 Pandemic: A Single-Center Experience.	Lehmann, H. Immo; Sharma, Krishan; Bhatia, Roma; Mills, Theresa; Lang, Joshua; Li, Guoping; Andrews, Carl; Cullivan, Jay; Singh, Jagmeet; Mela, Theofanie	2023	Not Documented	Not Documented	Not Documented	Not Documented
5	Implementing an EHR-based Screening and Referral System to Address Social Determinants of Health in Primary Care.	Buitron de la Vega, Pablo; Losi, Stephanie; Sprague Martinez, Linda; Bovell-Ammon, Allison; Garg, Arvin; James, Thea; Ewen, Alana M.; Stack, Marna; DeCarvalho, Heloisa; Sandel, Megan; Mishuris, Rebecca G.; Deych, Stella; Pelletier, Patrick; Kressin, Nancy R.	2019	Yes	Yes	Yes	Yes
6	Documentation and review of social determinants of health data in the EHR: measures and associated insights.	Wang, Michael; Pantell, Matthew S.; Gottlieb, Laura M.; Adler-Milstein, Julia	2021	Not Documented	Not Documented	Not Documented	Not Documented
7	Effect of Community Health Workers on 30-Day Hospital Readmissions in an Accountable Care Organization Population: A Randomized Clinical Trial.	Carter, Jocelyn; Hassan, Susan; Walton, Anne; Yu, Liyang; Donelan, Karen; Thorndike, Anne N.	2021	Yes; All CHWs received 1 month of protocol training led by the study CHW supervisor. CHW core competencies were emphasized during training and applied to case-based scenarios.	Not documented	Not Documented	Not Documented
8	The impact of enhancing self-management support for diabetes in Community Health Centers through patient engagement and relationship building: a primary care pragmatic cluster-randomized trial.	Hessler, Danielle; Fisher, Lawrence; Dickinson, Miriam; Dickinson, Perry; Parra, José; Potter, Michael B.	2022	Not Documented	Not Documented	Not Documented	Not Documented
9	Online Telehealth Delivery of Group Mental Health Treatment Is Safe, Feasible, and Increases Enrollment and Attendance in Post-9/11 U.S. Veterans.	Fortier, Catherine B.; Currao, Alyssa; Kenna, Alexandra; Kim, Sahra; Beck, Brigitta M.; Katz, Dylan; Hursh, Colleen; Fonda, Jennifer R.	2022	Not Documented	Not Documented	Not Documented	Not Documented
10	Computerized Intervention in Primary Care for Women Veterans with Sexual Assault Histories and Psychosocial Health Risks: a Randomized Clinical Trial.	Creech, Suzannah K.; Pulverman, Carey S.; Kahler, Christopher W.; Orchowski, Lindsay M.; Shea, M. Tracie; Wernette, Golfo Tzilos; Zlotnick, Caron	2022	Not Documented	Not Documented	Not Documented	Not Documented
11	Bridge to Health/Puente a la Salud: a pilot randomized trial to address diabetes self-management and social needs among high-risk patients.	Fitzpatrick, Stephanie L.; Papajorgji-Taylor, Dea; Schneider, Jennifer L.; Lindberg, Nangel; Francisco, Melanie; Smith, Ning; Vaughn, Katie; Vrany, Elizabeth A.; Hill-Briggs, Felicia	2022	Not Documented	Not Documented	Not Documented	Not Documented
12	Impact of a Low-Intensity Resource Referral Intervention on Patients' Knowledge, Beliefs, and Use of Community Resources: Results from the CommunityRx Trial.	Tung, Elizabeth L.; Abramsohn, Emily M.; Boyd, Kelly; Makelarski, Jennifer A.; Beiser, David G.; Chou, Chiahung; Huang, Elbert S.; Ozik, Jonathan; Kaligotla, Chaitanya; Lindau, Stacy Tessler	2020	Not Documented	Yes	Not Documented	Yes
13	Patient navigation to address sociolegal barriers for patients with cancer: A comparative-effectiveness study.	Battaglia, Tracy A.; Gunn, Christine M.; Bak, Sharon M.; Flacks, JoHanna; Nelson, Kerrie P.; Wang, Na; Ko, Naomi Y.; Morton, Samantha J.	2022	Not Documented	Not Documented	Not Documented	Not Documented
14	Nurse-led hospital-to-community care, clinical outcomes for people living with HIV and health-related social needs	Moen, Marik; Doede, Megan; Johantgen, Meg; Taber, Deborah; Adesanya, Ikmat; Werthman, Emily; Friedmann, Erika	2022	Not Documented	Not Documented	Not Documented	Not Documented
15	Improving Diabetes Care Through Population Health Innovations and Payments: Lessons from Western Maryland.	Wang, Gary X.; Gauthier, Richard; Gunter, Kathryn E.; Johnson, Lori; Zhu, Mengqi; Wan, Wen; Tanumihardjo, Jacob P.; Chin, Marshall H.	2023	Not Documented	Not documented	Not Documented	Not Documented; For example, if a DMCC identified food insecurity as a barrier, then they would refer to a CHW who would assess program eligibility (e.g., SNAP), frequency of needs, and options for local resources. DMCCs formally followed patients at 3-month intervals for a minimum of 6 months through telephone and in-person encounters. They then continued existing management or de-escalated to l…
16	Financing Diabetes Care in the U.S. Health System: Payment Innovations for Addressing the Medical and Social Determinants of Health.	Saulsberry, Loren; Peek, Monica	2019	Not Documented	Not Documented	Not Documented	Not Documented
17	Clinical and Sociobehavioral Prediction Model of 30-Day Hospital Readmissions Among People With HIV and Substance Use Disorder: Beyond Electronic Health Record Data.	Nijhawan, Ank E.; Metsch, Lisa R.; Zhang, Song; Feaster, Daniel J.; Gooden, Lauren; Jain, Mamta K.; Walker, Robrina; Huffaker, Shannon; Mugavero, Michael J.; Jacobs, Petra; Armstrong, Wendy S.; Daar, Eric S.; Sullivan, Meg; Del Rio, Carlos; Halm, Ethan A.	2019	Not Documented	Not Documented	Not Documented	Not Documented
18	Effects of a standardized community health worker intervention on hospitalization among disadvantaged patients with multiple chronic conditions: A pooled analysis of three clinical trials.	Vasan, Aditi; Morgan, John W.; Mitra, Nandita; Xu, Chang; Long, Judith A.; Asch, David A.; Kangovi, Shreya	2020	Not Documented	Not Documented	Not Documented	Not Documented
19	Screening for health-related social needs in the emergency department: Adaptability and fidelity during the COVID-19 pandemic.	Murray, Evangelia; Roosevelt, Genie E.; Vogel, Jody A.	2022	Not Documented	Not Documented	Not Documented	Not Documented
20	Food Insecurity in Older Adults in an Integrated Health Care System	Steiner JF, Stenmark SH, Sterrett AT, Paolino AR, Stiefel M, Gozansky WS, Zeng C.	2018	Not Documented	Not Documented	Not Documented	Not Documented
21	Development and Implementation of a Maryland State Program Providing Hospital Payment Incentives for Reduction in Readmission Disparities.	Rice, Kyle; Schuster, Alyson; Pack, Allan; Dougherty, Geoff B.	2023	Not Documented	Not Documented	Not Documented	Not Documented
22	Implementation fidelity to a behavioral diabetes prevention intervention in two New York City safety net primary care practices.	Gupta, Avni; Hu, Jiyuan; Huang, Shengnan; Diaz, Laura; Gore, Radhika; Levy, Natalie; Bergman, Michael; Tanner, Michael; Sherman, Scott E.; Islam, Nadia; Schwartz, Mark D.	2023	Not Documented	Not Documented	Not Documented	Not Documented
23	Implementing CenteringPregnancy Group Prenatal Care for Minority Women Living with HIV at an Urban University Hospital.	Potter, JoNell E.; Duthely, Lunthita M.; Diaz-Mendez, Nelly; Smith, Lindsay; Messick, Barbara J.; Echenique, Maria; Galli, Johnny; Yasin, Salih; Villar-Loubet, Olga	2019	Not Documented	Not Documented	Not Documented	Not Documented
24	Management of Isolated Skull Fractures in Pediatric Patients: A Systematic Review.	Donaldson, Katelyn; Li, Xun; Sartorelli, Kennith H.; Weimersheimer, Peter; Durham, Susan R.	2019	Not Documented	Not Documented	Not Documented	Not Documented
25	Health Center-Based Community-Supported Agriculture: An RCT.	Berkowitz, Seth A.; O'Neill, Jessica; Sayer, Edward; Shahid, Naysha N.; Petrie, Maegan; Schouboe, Sophie; Saraceno, Megan; Bellin, Rochelle	2019	Not Documented	Not Documented; This was a community-based intervention in Franklin County conducted by a community health center	Not Documented	Not Documented
26	Effects of In-Person Assistance vs Personalized Written Resources About Social Services on Household Social Risks and Child and Caregiver Health: A Randomized Clinical Trial.	Gottlieb, Laura M.; Adler, Nancy E.; Wing, Holly; Velazquez, Denisse; Keeton, Victoria; Romero, Abigail; Hernandez, Maricarmen; Munoz Vera, Andrea; Urrutia Caceres, Elizabeth; Arevalo, Catherine; Herrera, Philip; Bernal Suarez, Mara; Hessler, Danielle	2020	Not Documented	Not Documented; this study involved use of navigators in a clinic setting; involvement of care team not documented	Not Documented	Not Documented
27	Feasibility of a family-centered intervention for depressed older men in primary care.	Hinton, Ladson; La Frano, Erika; Harvey, Danielle; Alfaro, Eduardo Delgadillo; Kravitz, Richard; Smith, Andrew; Apesoa-Varano, Ester Carolina; Jafri, Asma; Unutzer, Jurgen	2019	Not Documented	Not Documented	Not Documented	Not Documented
28	Intensive care management for high-risk veterans in a patient-centered medical home - do some veterans benefit more than others?	Swankoski, Kaylyn E.; Reddy, Ashok; Grembowski, David; Chang, Evelyn T.; Wong, Edwin S.	2023	Not Documented	Not Documented	Not Documented	Not Documented
29	Pragmatic Clinical Trial to Improve Patient Experience Among Adults During Transitions from Hospital to Home: the PArTNER study.	LaBedz, Stephanie L.; Prieto-Centurion, Valentin; Mutso, Amelia; Basu, Sanjib; Bracken, Nina E.; Calhoun, Elizabeth A.; DiDomenico, Robert J.; Joo, Min; Pickard, A. Simon; Pittendrigh, Barry; Williams, Mark V.; Illendula, Sai; Krishnan, Jerry A.	2022	Not Documented	Not Documented	Not Documented	Not Documented
30	Medical-Legal Partnership Effects on Mental Health, Health Care Use, and Quality of Life in Primary Care: A Randomized Clinical Trial.	Liaw, Winston; Northrup, Thomas F.; Stotts, Angela L.; Bakos-Block, Christine; Suchting, Robert; Chen, Alvin; Hernandez, Abigail; Finzetto, Lisandra; Green, Charles; Murphy, Thomas	2023	Not Documented	Not Documented	Not Documented	Not Documented
31	Predictive Model-Driven Hotspotting to Decrease Emergency Department Visits: a Randomized Controlled Trial.	Post, Brady; Lapedis, Jeremy; Singh, Karandeep; Valenstein, Paul; Büyüktür, Ayşe G.; Teske, Karin; Ryan, Andrew M.	2021	Not Documented	Not Documented	Not Documented	Not Documented
32	A care coordinator screening strategy to address health harming legal needs	Berg, Daniel; Setrini, Alice; Chan, Kathy; Cibulskis, Ann; Ameji, Kulsum; Hinami, Keiki	2022	Not Documented	Not Documented	Not Documented	Not Documented
33	Evidence that collaborative action between local health departments and nonprofit hospitals helps foster healthy behaviors in communities: a multilevel study	Geri Rosen Cramer; Young, Gary J; Singh, Simone; McGuire, Jean; Kim, Daniel	2021	Not Documented	Not Documented	Not Documented	Not Documented
34	Hospital Partnerships for Population Health: A Systematic Review of the Literature	Hilts Katy Ellis; Yeager, Valerie A; Joseph, Gibson P; Halverson, Paul K; Blackburn, Justin; Menachemi Nir	2021	Not Documented	Not Documented	Not Documented	Not Documented
35	Medicaid Investments To Address Social Needs In Oregon And California	Alderwick, Hugh; Hood-Ronick, Carlyn M; Gottlieb, Laura M	2019	Not Documented	Not Documented	Not Documented	Not Documented
36	Enabling Services Improve Access To Care, Preventive Services, And Satisfaction Among Health Center Patients	Yue, Dahai; Pourat, Nadereh; Chen, Xiao; Lu, Connie; Zhou, Weihao; Daniel, Marlon; Hoang, Hank; Sripipatana, Alek; Ponce, Ninez A	2019	Not Documented	Not Documented	Not Documented	Not Documented
37	A Social-Return-On-Investment Analysis Of Bon Secours Hospital's 'Housing For Health' Affordable Housing Program	Drabo, Emmanuel Fulgence; Eckel, Grace; Ross, Samuel L; Brozic, Michael; Carlton, Chanie G; Warren, Tatiana Y; Kleb, George; Laird, Aurelia; Porter, Keshia M Pollack; Pollack, Craig Evan	2021	Not Documented	Not Documented	Not Documented	Not Documented
38	Embedding Social Workers In Veterans Health Administration Primary Care Teams Reduces Emergency Department Visits	Cornell, Portia Y; Halladay, Christopher W; Ader, Joseph; Halaszynski, Jaime; Hogue, Melinda; McClain, Cristian E; Silva, Jennifer W; Taylor, Laura D; Rudolph, James L	2020	Yes	Not Documented	Not Documented	Not Documented
39	Project Nurture Integrates Care And Services To Improve Outcomes For Opioid-Dependent Mothers And Their Children	McConnell, K John; Kaufman, Menolly R; Grunditz, Jenny I; Bellanca, Helen; Risser, Amanda; Rodriguez, Maria I; Renfro, Stephanie	2020	Not Documented	Not Documented	Not Documented	Not Documented
40	Addressing the Poverty Barrier in Collaborative Care for Adults Experiencing Homelessness: A Case-Based Report	Cabán-Alemán Carissa; Iobst Saraswati; Luna, Aniuska M; Foster, Adriana	2020	Not Documented	Not Documented	Not Documented	Not Documented
41	Interprofessional, multitiered daily rounding management in a high-acuity hospital	Eamranond, Pracha Peter; Bhukhen, Arti; DiPalma, Donna; Schawan Kunuakaphun; Burke, Thomas; Rodis, John; Grey, Michael	2020	Not Documented	Not Documented	Not Documented	Not Documented
42	Indianapolis Provider's Use Of Wraparound Services Associated With Reduced Hospitalizations And Emergency Department Visits	Vest, Joshua R; Harris, Lisa E; Haut, Dawn P; Halverson, Paul K; Menachemi, Nir	2018	Not Documented	Not Documented	Yes	Not Documented
43	Reasons for Social Work Referrals in an Urban Safety-Net Population: A Natural Language Processing and Market Basket Analysis Approach.	Bako, Abdulaziz T.; Walter-McCabe, Heather; Kasthurirathne, Suranga N.; Halverson, Paul K.; Vest, Joshua R.	2021	Not Documented	Not Documented	Not Documented	Not Documented
44	The Impact of Food Insecurity Screenings and Community Food Resource Referrals for Patients with Type 2 Diabetes.	Ofili, Miriam Ngozi; Lawson, Robin M.	2020	Not Documented	Not Documented	Not Documented	Yes
45	The implementation cost of a safety‐net hospital program addressing social needs in Atlanta.	MacLeod, Kara E.; Chapel, John M.; McCurdy, Matthew; Minaya‐Junca, Jasmin; Wirth, Diane; Onwuanyi, Anekwe; Lane, Rashon I.	2021	Not Documented	Not Documented	Not Documented	Not Documented
46	Development of a homelessness risk screening tool for emergency department patients.	Doran, Kelly M.; Johns, Eileen; Zuiderveen, Sara; Shinn, Marybeth; Dinan, Kinsey; Schretzman, Maryanne; Gelberg, Lillian; Culhane, Dennis; Shelley, Donna; Mijanovich, Tod	2022	Not Documented	Not Documented	Not Documented	Not Documented
47	An embedded multiple case study: using CFIR to map clinical food security screening constructs for the development of primary care practice guidelines.	Taher, Sabira; Muramatsu, Naoko; Odoms-Young, Angela; Peacock, Nadine; Michael, C. Fagen; Courtney, K. Suh	2022	Not Documented	Not Documented	Not Documented	Yes
48	Conceptualizing the effective mechanisms of a social needs case management program shown to reduce hospital use: a qualitative study.	Fleming, Mark D.; Safaeinili, Nadia; Knox, Margae; Hernandez, Elizabeth; Esteban, Emily E.; Sarkar, Urmimala; Brewster, Amanda L.	2022	Staffing models existed but the article does not specify if it was developed in EHR	Not Documented	Not Documented	Not Documented
49	Social Needs Screening and Referral Program at a Large US Public Hospital System, 2017.	Berry, Carolyn; Paul, Margaret; Massar, Rachel; Marcello, Roopa Kalyanaraman; Krauskopf, Marian	2020	Not Documented	Not Documented	Not Documented	Not Documented
50	A Nurse-Led Intervention to Address Food Insecurity in Chicago.	Grenier, Jennifer; Wynn, Nicole	2018	Not Documented	Not Documented	Not Documented	Not Documented
51	Training Student Volunteers as "Community Resource Navigators" to Integrate Health and Social Care in Primary Care.	Gautam, Diwas; Kutzer, Kate; Sandhu, Sahil; Dennis, Erika; Xu, Jacqueline; Blanchard, Lilian; Munoz, Veronica; Drake, Connor; Crowder, Carolyn; Eisenson, Howard; Bettger, Janet	2022	Not Documented	Not Documented	Not Documented	Not Documented
52	An In-Clinic Food Pharmacy Addresses Very Low Food Security.	Cooper, Emily; Mohanan, Sveta; Garcia, Christina; Thomas, Tamara Baldwin; Ozgun, Holly; Hernandez, Brisa; Cheng, Iris; Cole, Alisahah J.	2020	Not Documented	Not Documented	Not Documented	Not Documented
53	Evidence based processes to prevent readmissions: more is better, a ten-site observational study.	Pugh, Jacqueline; Penney, Lauren S.; Noël, Polly H.; Neller, Sean; Mader, Michael; Finley, Erin P.; Lanham, Holly J.; Leykum, Luci	2021	Not Documented	Not Documented	Not Documented	Not Documented
54	Unmet Social Needs and No-Show Visits in Primary Care in a US Northeastern Urban Health System, 2018–2019.	Fiori, Kevin P.; Heller, Caroline G.; Rehm, Colin D.; Parsons, Amanda; Flattau, Anna; Braganza, Sandra; Lue, Kelly; Lauria, Molly; Racine, Andrew	2020	Not Documented	Not Documented	Not Documented	Not Documented
55	Cooling The Hot Spots Where Child Hospitalization Rates Are High: A Neighborhood Approach To Population Health	Beck, Andrew F; Anderson, Kristy L; Rich, Kate; Taylor, Stuart C; Iyer, Srikant B; Kotagal, Uma R; Kahn, Robert S	2019	Not Documented	Not Documented	Not Documented	Yes
56	Quantifying Health Systems' Investment In Social Determinants Of Health, By Sector, 2017–19	Horwitz, Leora I; Chang, Carol; Arcilla, Harmony N; Knickman, James R	2020	Not Documented	Not Documented	Not Documented	Not Documented
57	Prescribing Housing: A Scoping Review of Health System Efforts to Address Housing as a Social Determinant of Health.	Koeman, Jamison; Mehdipanah, Roshanak	2021	Not Documented	Not Documented	Not Documented	Not Documented
58	The Baltimore Community-Based Organizations Neighborhood Network: Enhancing Capacity Together (CONNECT) Cluster RCT.	Wu, Albert W.; Weston, Christine M.; Ibe, Chidinma A.; Ruberman, Claire F.; Bone, Lee; Boonyasai, Romsai T.; Hwang, Sandra; Gentry, Janice; Purnell, Leon; Lu, Yanyan; Liang, Shuwen; Rosenblum, Michael	2019	Not Documented	Not Documented	Not Documented	Not Documented
59	Effect of Community Health Worker Support on Clinical Outcomes of Low-Income Patients Across Primary Care Facilities: A Randomized Clinical Trial.	Kangovi, Shreya; Mitra, Nandita; Norton, Lindsey; Harte, Rory; Zhao, Xinyi; Carter, Tamala; Grande, David; Long, Judith A.	2018	Not Documented	Not Documented	Not Documented	Not Documented
60	Food for Thought: A Randomized Trial of Food Insecurity Screening in the Emergency Department.	Cullen, Danielle; Woodford, Ashley; Fein, Joel	2019	Not Documented	Not Documented	Not Documented	Not Documented
61	Effect of a Peer-Led Behavioral Intervention for Emergency Department Patients at High Risk of Fatal Opioid Overdose: A Randomized Clinical Trial.	Beaudoin, Francesca L.; Jacka, Brendan P.; Li, Yu; Samuels, Elizabeth A.; Hallowell, Benjamin D.; Peachey, Alyssa M.; Newman, Roxxanne A.; Daly, Mackenzie M.; Langdon, Kirsten J.; Marshall, Brandon D. L.	2022	Not Documented	Not Documented	Not Documented	Not Documented
62	Patient plus partner trial: A randomized controlled trial of 2 interventions to improve outcomes after an initial implantable cardioverter-defibrillator.	Dougherty, Cynthia M.; Thompson, Elaine A.; Kudenchuk, Peter J.	2019	Not Documented	Not Documented	Not Documented	Not Documented
63	Illustrating the value of social work: results of an open pilot trial of the psychosocial acuity scale in a large urban pediatric hospital.	Sable, Paige; Ross, Abigail; Clock, Annie; Corder, Brooke; Lamontagne, Nicole; McCaig, Jessica; Shanske, Susan; Tvedte, Matthew; Cummings, Jennifer; Chamorro, Pamela	2021	Not Documented	Not Documented	Not Documented	Not Documented
64	Using Publicly Available Data to Understand the Opioid Overdose Epidemic: Geospatial Distribution of Discarded Needles in Boston, Massachusetts	Bearnot, Benjamin, MD; Pearson, John F, MD; Rodriguez, Jorge A, MD	2018	Not Documented	Not Documented	Not Documented	Not Documented
65	Predictors for Poor Linkage to Care Among Hospitalized Persons Living with HIV and Co-Occurring Substance Use Disorder.	Summers, Nathan A.; Colasanti, Jonathan A.; Feaster, Daniel J.; Armstrong, Wendy S.; Rodriguez, Allan; Jain, Mamta K.; Jacobs, Petra; Metsch, Lisa R.; Del Rio, Carlos	2020	Not Documented	Not Documented	Not Documented	Not Documented
66	Enhanced care planning and clinical-community linkages versus usual care to address basic needs of patients with multiple chronic conditions: a clinician-level randomized controlled trial.	Krist, Alex H.; O'Loughlin, Kristen; Woolf, Steven H.; Sabo, Roy T.; Hinesley, Jennifer; Kuzel, Anton J.; Rybarczyk, Bruce D.; Kashiri, Paulette Lail; Brooks, E. Marshall; Glasgow, Russel E.; Huebschmann, Amy G.; Liaw, Winston R.	2020	Not Documented	Not Documented	Not Documented	Not Documented
67	Social Risks Among Primary Care Patients in a Large Urban Health System.	Heller, Caroline G.; Parsons, Amanda S.; Chambers, Earle C.; Fiori, Kevin P.; Rehm, Colin D.	2020	Not Documented	Not Documented	Not Documented	Not Documented
68	Relationship of Neighborhood Deprivation and Outcomes of a Comprehensive ST-Segment-Elevation Myocardial Infarction Protocol.	Huded, Chetan P.; Dalton, Jarrod E.; Kumar, Anirudh; Krieger, Nikolas I.; Kassis, Nicholas; Phelan, Michael; Kravitz, Kathleen; Reed, Grant W.; Krishnaswamy, Amar; Kapadia, Samir R.; Khot, Umesh	2021	Not Documented	Not Documented	Not Documented	Not Documented
69	Enhancing Reach Out and Read With a Video and Text Messages: A Randomized Trial in a Low-Income Predominantly Latino Sample.	Jimenez, Manuel E.; Crabtree, Benjamin F.; Hudson, Shawna V.; Mendelsohn, Alan L.; Lima, Daniel; Shelton, Patricia A.; Veras, Julissa; Lin, Yong; Pellerano, Maria; Morrow, Lesley; Strom, Brian L.	2021	Not Documented	Not Documented	Not Documented	Not Documented
70	Social Needs Screening in Hospitalized Pediatric Patients: A Randomized Controlled Trial.	Lopez, Michelle A.; Yu, Xian; Hetrick, Rebecca; Raman, Shivani; Lee, Jessica; Hall, Julie; Tran, Katherine; Vonasek, Bryan; Garg, Arvin; Raphael, Jean; Bocchini, Claire	2023	Not Documented	Not Documented	Not Documented	Not Documented

## Sheet: Review Question 1_STEP4
Review Question 1: How have hospitals fared in addressing SDOH compared to the four-step conceptual ideal? (Contd.)
				Step 4: Evaluate the Impact of Integrating SDOH into Primary Care
Record #	Article Name	Author	Year	Step 4a: Was the impact of addressing SDOH on specific outcomes evaluated? (Yes/Not Documented)	Step 4b: Was the impact of integrating SDOH on patient and provider experiences evaluated? (Yes/Not Documented)	Step 4c: Were the costs and benefits of collecting SDOH data assessed? (Yes/Not Documented)	Step 4d: Was the utility of SDOH data for risk adjustment and value-based payment assessed? (Yes/Not Documented)	Step 4e: Were SDOH data integrated into risk and utilization prediction models? (Yes/Not Documented)	Step 4f: Were SDOH data used to assess gaps and develop policy and advocacy? (Yes/Not Documented)
1	Missed psychosocial risk factors during routine preoperative evaluations are associated with increased complications after elective cancer surgery.	Meyers, Patrick M.; Leeds, Ira L.; Enumah, Zachary O.; Burkhart, Richard A.; He, Jin; Haut, Elliott R.; Efron, Jonathan E.; Johnston, Fabian M.	2019	Yes	Not Documented	Not Documented	Not Documented	Not Documented	Not Documented
2	Outpatient Palliative Care for Noncancer Illnesses: One Program's Experience with Implementation, Impact, and Lessons Learned.	Bischoff, Kara E.; Lin, Joseph; Cohen, Eve; O'Riordan, David L.; Meister, Sarah; Zapata, Carly; Sicotte, Jeffrey; Lindenfeld, Paul; Calton, Brook; Pantilat, Steven Z.	2022	Yes	Not Documented	Not Documented	Not Documented	Not Documented	Not Documented
3	Financial Incentives for Smoking Cessation in Hospitalized Patients: A Randomized Clinical Trial.	Ladapo, Joseph A.; Tseng, Chi-Hong; Sherman, Scott E.	2020	Yes	Not Documented	Not Documented	Not Documented	Not Documented	Yes
4	Real-World Disparities in Remote Follow-Up of Cardiac Implantable Electronic Devices and Impact of the COVID-19 Pandemic: A Single-Center Experience.	Lehmann, H. Immo; Sharma, Krishan; Bhatia, Roma; Mills, Theresa; Lang, Joshua; Li, Guoping; Andrews, Carl; Cullivan, Jay; Singh, Jagmeet; Mela, Theofanie	2023	Not documented; descriptive study; not interventional study seeking to examine disparities in RM for cardiac implantable devices	Not Documented	Not Documented	Not Documented	Not Documented	Not Documented
5	Implementing an EHR-based Screening and Referral System to Address Social Determinants of Health in Primary Care.	Buitron de la Vega, Pablo; Losi, Stephanie; Sprague Martinez, Linda; Bovell-Ammon, Allison; Garg, Arvin; James, Thea; Ewen, Alana M.; Stack, Marna; DeCarvalho, Heloisa; Sandel, Megan; Mishuris, Rebecca G.; Deych, Stella; Pelletier, Patrick; Kressin, Nancy R.	2019	Yes	Yes	Not Documented	Not Documented	Not Documented	Not Documented
6	Documentation and review of social determinants of health data in the EHR: measures and associated insights.	Wang, Michael; Pantell, Matthew S.; Gottlieb, Laura M.; Adler-Milstein, Julia	2021	Not Documented	Not Documented	Not Documented	Not Documented	Not Documented	Not Documented
7	Effect of Community Health Workers on 30-Day Hospital Readmissions in an Accountable Care Organization Population: A Randomized Clinical Trial.	Carter, Jocelyn; Hassan, Susan; Walton, Anne; Yu, Liyang; Donelan, Karen; Thorndike, Anne N.	2021	Yes	Not Documented	Not Documented	Yes (Value-Based Care ACO Model Used)	Not Documented	Not Documented
8	The impact of enhancing self-management support for diabetes in Community Health Centers through patient engagement and relationship building: a primary care pragmatic cluster-randomized trial.	Hessler, Danielle; Fisher, Lawrence; Dickinson, Miriam; Dickinson, Perry; Parra, José; Potter, Michael B.	2022	Yes	Not Documented	Not Documented	Not Documented	Not Documented	Not Documented
9	Online Telehealth Delivery of Group Mental Health Treatment Is Safe, Feasible, and Increases Enrollment and Attendance in Post-9/11 U.S. Veterans.	Fortier, Catherine B.; Currao, Alyssa; Kenna, Alexandra; Kim, Sahra; Beck, Brigitta M.; Katz, Dylan; Hursh, Colleen; Fonda, Jennifer R.	2022	Yes	Yes	Not Documented	Not Documented	Not Documented	Not Documented
10	Computerized Intervention in Primary Care for Women Veterans with Sexual Assault Histories and Psychosocial Health Risks: a Randomized Clinical Trial.	Creech, Suzannah K.; Pulverman, Carey S.; Kahler, Christopher W.; Orchowski, Lindsay M.; Shea, M. Tracie; Wernette, Golfo Tzilos; Zlotnick, Caron	2022	Yes	Not Documented	Not Documented	Not Documented	Not Documented	Not Documented
11	Bridge to Health/Puente a la Salud: a pilot randomized trial to address diabetes self-management and social needs among high-risk patients.	Fitzpatrick, Stephanie L.; Papajorgji-Taylor, Dea; Schneider, Jennifer L.; Lindberg, Nangel; Francisco, Melanie; Smith, Ning; Vaughn, Katie; Vrany, Elizabeth A.; Hill-Briggs, Felicia	2022	Yes	Not Documented	Not Documented	Not Documented	Not Documented	Not Documented
12	Impact of a Low-Intensity Resource Referral Intervention on Patients' Knowledge, Beliefs, and Use of Community Resources: Results from the CommunityRx Trial.	Tung, Elizabeth L.; Abramsohn, Emily M.; Boyd, Kelly; Makelarski, Jennifer A.; Beiser, David G.; Chou, Chiahung; Huang, Elbert S.; Ozik, Jonathan; Kaligotla, Chaitanya; Lindau, Stacy Tessler	2020	Not documented	Not documented	Not documented	Not documented	Not documented	Not documented
13	Patient navigation to address sociolegal barriers for patients with cancer: A comparative-effectiveness study.	Battaglia, Tracy A.; Gunn, Christine M.; Bak, Sharon M.; Flacks, JoHanna; Nelson, Kerrie P.; Wang, Na; Ko, Naomi Y.; Morton, Samantha J.	2022	Yes	Not Documented	Not Documented	Not Documented	Not Documented	Not Documented
14	Nurse-led hospital-to-community care, clinical outcomes for people living with HIV and health-related social needs	Moen, Marik; Doede, Megan; Johantgen, Meg; Taber, Deborah; Adesanya, Ikmat; Werthman, Emily; Friedmann, Erika	2022	Yes	Not Documented	Not Documented	Not Documented	Not Documented	Not Documented
15	Improving Diabetes Care Through Population Health Innovations and Payments: Lessons from Western Maryland.	Wang, Gary X.; Gauthier, Richard; Gunter, Kathryn E.; Johnson, Lori; Zhu, Mengqi; Wan, Wen; Tanumihardjo, Jacob P.; Chin, Marshall H.	2023	Yes	Not Documented	Not Documented	Yes (Global Budget Model discussed)	Yes; Maryland’s global budget model differs from other APMs like Accountable Care Organizations (ACOs) by prospectively setting annual funding to cover inpatient and outpatient services for an attributed patient population across payers and putting hospitals at greater financial risk than in ACO shared savings models in which providers share in a smaller percentage of savings or losses.39 By prov…	Yes; New payment models, such as hospital global budgets, can provide the flexibility and incentives needed to develop and sustain innovative care models. UPMC Western Maryland provides a first case study in Maryland that suggests how these payment changes can lead to care programs that are associated with durable improvements in patient-reported outcomes, glycemic control, and hospitalizations f…
16	Financing Diabetes Care in the U.S. Health System: Payment Innovations for Addressing the Medical and Social Determinants of Health.	Saulsberry, Loren; Peek, Monica	2019	Not Documented	Not Documented	Not Documented	The article discusses on how the healthcare finances like fee-for-service could effect in addressing the SDOH factors	Not Documented	Not Documented
17	Clinical and Sociobehavioral Prediction Model of 30-Day Hospital Readmissions Among People With HIV and Substance Use Disorder: Beyond Electronic Health Record Data.	Nijhawan, Ank E.; Metsch, Lisa R.; Zhang, Song; Feaster, Daniel J.; Gooden, Lauren; Jain, Mamta K.; Walker, Robrina; Huffaker, Shannon; Mugavero, Michael J.; Jacobs, Petra; Armstrong, Wendy S.; Daar, Eric S.; Sullivan, Meg; Del Rio, Carlos; Halm, Ethan A.	2019	Yes	Not Documented	Not Documented	Not Documented	Not Documented	Not Documented
18	Effects of a standardized community health worker intervention on hospitalization among disadvantaged patients with multiple chronic conditions: A pooled analysis of three clinical trials.	Vasan, Aditi; Morgan, John W.; Mitra, Nandita; Xu, Chang; Long, Judith A.; Asch, David A.; Kangovi, Shreya	2020	Yes	Not Documented	Not Documented	Not Documented	Not Documented	Not Documented
19	Screening for health-related social needs in the emergency department: Adaptability and fidelity during the COVID-19 pandemic.	Murray, Evangelia; Roosevelt, Genie E.; Vogel, Jody A.	2022	Not Documented	Not Documented	Not Documented	Not Documented	Not Documented	Not Documented
20	Food Insecurity in Older Adults in an Integrated Health Care System	Steiner JF, Stenmark SH, Sterrett AT, Paolino AR, Stiefel M, Gozansky WS, Zeng C.	2018	Not Documented	Not Documented	Not Documented	Not Documented	Not Documented	Not Documented
21	Development and Implementation of a Maryland State Program Providing Hospital Payment Incentives for Reduction in Readmission Disparities.	Rice, Kyle; Schuster, Alyson; Pack, Allan; Dougherty, Geoff B.	2023	Not Documented	Not Documented	Not Documented	Not Documented	Not Documented	Not Documented
22	Implementation fidelity to a behavioral diabetes prevention intervention in two New York City safety net primary care practices.	Gupta, Avni; Hu, Jiyuan; Huang, Shengnan; Diaz, Laura; Gore, Radhika; Levy, Natalie; Bergman, Michael; Tanner, Michael; Sherman, Scott E.; Islam, Nadia; Schwartz, Mark D.	2023	Yes	Not Documented	Not Documented	Not Documented	Not Documented	Not Documented
23	Implementing CenteringPregnancy Group Prenatal Care for Minority Women Living with HIV at an Urban University Hospital.	Potter, JoNell E.; Duthely, Lunthita M.; Diaz-Mendez, Nelly; Smith, Lindsay; Messick, Barbara J.; Echenique, Maria; Galli, Johnny; Yasin, Salih; Villar-Loubet, Olga	2019	Not Documented	Not Documented	Not Documented	Not Documented	Not Documented	Not Documented
24	Management of Isolated Skull Fractures in Pediatric Patients: A Systematic Review.	Donaldson, Katelyn; Li, Xun; Sartorelli, Kennith H.; Weimersheimer, Peter; Durham, Susan R.	2019	Not Documented	Not Documented	Not Documented	Not Documented	Not Documented	Not Documented
25	Health Center-Based Community-Supported Agriculture: An RCT.	Berkowitz, Seth A.; O'Neill, Jessica; Sayer, Edward; Shahid, Naysha N.; Petrie, Maegan; Schouboe, Sophie; Saraceno, Megan; Bellin, Rochelle	2019	Yes	Not Documented	Not Documented	Not Documented	Not Documented	Not Documented
26	Effects of In-Person Assistance vs Personalized Written Resources About Social Services on Household Social Risks and Child and Caregiver Health: A Randomized Clinical Trial.	Gottlieb, Laura M.; Adler, Nancy E.; Wing, Holly; Velazquez, Denisse; Keeton, Victoria; Romero, Abigail; Hernandez, Maricarmen; Munoz Vera, Andrea; Urrutia Caceres, Elizabeth; Arevalo, Catherine; Herrera, Philip; Bernal Suarez, Mara; Hessler, Danielle	2020	Yes	Not Documented	Not Documented	Not Documented	Not Documented	Not Documented
27	Feasibility of a family-centered intervention for depressed older men in primary care.	Hinton, Ladson; La Frano, Erika; Harvey, Danielle; Alfaro, Eduardo Delgadillo; Kravitz, Richard; Smith, Andrew; Apesoa-Varano, Ester Carolina; Jafri, Asma; Unutzer, Jurgen	2019	Yes	Not Documented	Not Documented	Not Documented	Not Documented	Not Documented
28	Intensive care management for high-risk veterans in a patient-centered medical home - do some veterans benefit more than others?	Swankoski, Kaylyn E.; Reddy, Ashok; Grembowski, David; Chang, Evelyn T.; Wong, Edwin S.	2023	Yes	Not Documented	Not Documented	Not Documented	Not Documented	Not Documented
29	Pragmatic Clinical Trial to Improve Patient Experience Among Adults During Transitions from Hospital to Home: the PArTNER study.	LaBedz, Stephanie L.; Prieto-Centurion, Valentin; Mutso, Amelia; Basu, Sanjib; Bracken, Nina E.; Calhoun, Elizabeth A.; DiDomenico, Robert J.; Joo, Min; Pickard, A. Simon; Pittendrigh, Barry; Williams, Mark V.; Illendula, Sai; Krishnan, Jerry A.	2022	Yes	Not Documented	Not Documented	Not Documented	Not Documented	Not Documented
30	Medical-Legal Partnership Effects on Mental Health, Health Care Use, and Quality of Life in Primary Care: A Randomized Clinical Trial.	Liaw, Winston; Northrup, Thomas F.; Stotts, Angela L.; Bakos-Block, Christine; Suchting, Robert; Chen, Alvin; Hernandez, Abigail; Finzetto, Lisandra; Green, Charles; Murphy, Thomas	2023	Yes	Yes, mental health and perceived stress levels were evaluated for patient	Not Documented	Not Documented	Not Documented	Not Documented
31	Predictive Model-Driven Hotspotting to Decrease Emergency Department Visits: a Randomized Controlled Trial.	Post, Brady; Lapedis, Jeremy; Singh, Karandeep; Valenstein, Paul; Büyüktür, Ayşe G.; Teske, Karin; Ryan, Andrew M.	2021	Yes	Not Documented	Not Documented	Not Documented	Yes	Not Documented
32	A care coordinator screening strategy to address health harming legal needs	Berg, Daniel; Setrini, Alice; Chan, Kathy; Cibulskis, Ann; Ameji, Kulsum; Hinami, Keiki	2022	Yes	Yes	Yes	Not Documented	Not Documented	Yes
33	Evidence that collaborative action between local health departments and nonprofit hospitals helps foster healthy behaviors in communities: a multilevel study	Geri Rosen Cramer; Young, Gary J; Singh, Simone; McGuire, Jean; Kim, Daniel	2021	Yes	Not Documented	Yes	Not Documented	Not Documented	Yes
34	Hospital Partnerships for Population Health: A Systematic Review of the Literature	Hilts Katy Ellis; Yeager, Valerie A; Joseph, Gibson P; Halverson, Paul K; Blackburn, Justin; Menachemi Nir	2021	Yes	Not Documented	Not Documented	Yes	Not Documented	Not Documented
35	Medicaid Investments To Address Social Needs In Oregon And California	Alderwick, Hugh; Hood-Ronick, Carlyn M; Gottlieb, Laura M	2019	Yes	Not Documented	Not Documented	Not Documented	Not Documented	Yes
36	Enabling Services Improve Access To Care, Preventive Services, And Satisfaction Among Health Center Patients	Yue, Dahai; Pourat, Nadereh; Chen, Xiao; Lu, Connie; Zhou, Weihao; Daniel, Marlon; Hoang, Hank; Sripipatana, Alek; Ponce, Ninez A	2019	Yes	Not Documented	Not Documented	Not Documented	Not Documented	Yes
37	A Social-Return-On-Investment Analysis Of Bon Secours Hospital's 'Housing For Health' Affordable Housing Program	Drabo, Emmanuel Fulgence; Eckel, Grace; Ross, Samuel L; Brozic, Michael; Carlton, Chanie G; Warren, Tatiana Y; Kleb, George; Laird, Aurelia; Porter, Keshia M Pollack; Pollack, Craig Evan	2021	Not Documented	Not Documented	Yes	Not Documented	Not Documented	Yes
38	Embedding Social Workers In Veterans Health Administration Primary Care Teams Reduces Emergency Department Visits	Cornell, Portia Y; Halladay, Christopher W; Ader, Joseph; Halaszynski, Jaime; Hogue, Melinda; McClain, Cristian E; Silva, Jennifer W; Taylor, Laura D; Rudolph, James L	2020	Yes	Not Documented	Not Documented	Not Documented	Not Documented	Yes
39	Project Nurture Integrates Care And Services To Improve Outcomes For Opioid-Dependent Mothers And Their Children	McConnell, K John; Kaufman, Menolly R; Grunditz, Jenny I; Bellanca, Helen; Risser, Amanda; Rodriguez, Maria I; Renfro, Stephanie	2020	Yes	Not Documented	Not Documented	Yes	Not Documented	Yes
40	Addressing the Poverty Barrier in Collaborative Care for Adults Experiencing Homelessness: A Case-Based Report	Cabán-Alemán Carissa; Iobst Saraswati; Luna, Aniuska M; Foster, Adriana	2020	Yes	Yes	Not Documented	Not Documented	Yes	Yes
41	Interprofessional, multitiered daily rounding management in a high-acuity hospital	Eamranond, Pracha Peter; Bhukhen, Arti; DiPalma, Donna; Schawan Kunuakaphun; Burke, Thomas; Rodis, John; Grey, Michael	2020	Not Documented	Not Documented	Not Documented	Not Documented	Not Documented	Not Documented
42	Indianapolis Provider's Use Of Wraparound Services Associated With Reduced Hospitalizations And Emergency Department Visits	Vest, Joshua R; Harris, Lisa E; Haut, Dawn P; Halverson, Paul K; Menachemi, Nir	2018	Yes	Not Documented	Yes	Yes	Yes	Yes
43	Reasons for Social Work Referrals in an Urban Safety-Net Population: A Natural Language Processing and Market Basket Analysis Approach.	Bako, Abdulaziz T.; Walter-McCabe, Heather; Kasthurirathne, Suranga N.; Halverson, Paul K.; Vest, Joshua R.	2021	Not Documented	Not Documented	Not Documented	Not Documented	Yes	Yes
44	The Impact of Food Insecurity Screenings and Community Food Resource Referrals for Patients with Type 2 Diabetes.	Ofili, Miriam Ngozi; Lawson, Robin M.	2020	Yes	Not Documented	Not Documented	Not Documented	Not Documented	Not Documented
45	The implementation cost of a safety‐net hospital program addressing social needs in Atlanta.	MacLeod, Kara E.; Chapel, John M.; McCurdy, Matthew; Minaya‐Junca, Jasmin; Wirth, Diane; Onwuanyi, Anekwe; Lane, Rashon I.	2021	Yes	Not Documented	Not Documented Although the article describes the implementation cost of the program, the costs and benefits of collecting SDOH data in particular were assessed separately.	Not Documented	Not Documented	Not Documented
46	Development of a homelessness risk screening tool for emergency department patients.	Doran, Kelly M.; Johns, Eileen; Zuiderveen, Sara; Shinn, Marybeth; Dinan, Kinsey; Schretzman, Maryanne; Gelberg, Lillian; Culhane, Dennis; Shelley, Donna; Mijanovich, Tod	2022	Not Documented The study has linked and presented the %of study population(patients) who entered a homeless center within six months of the baseline ED visit, using administrative data from CARES. However, it doesn't include any outcome measures as a result of the initiative i.e., development of screening tool.	Not Documented	Not Documented	Not Documented	Yes	Not Documented
47	An embedded multiple case study: using CFIR to map clinical food security screening constructs for the development of primary care practice guidelines.	Taher, Sabira; Muramatsu, Naoko; Odoms-Young, Angela; Peacock, Nadine; Michael, C. Fagen; Courtney, K. Suh	2022	Yes	Not Documented	Not Documented	Not Documented	Yes	Yes
48	Conceptualizing the effective mechanisms of a social needs case management program shown to reduce hospital use: a qualitative study.	Fleming, Mark D.; Safaeinili, Nadia; Knox, Margae; Hernandez, Elizabeth; Esteban, Emily E.; Sarkar, Urmimala; Brewster, Amanda L.	2022	Yes	Yes	Not Documented	Not Documented	Yes	Not Documented
49	Social Needs Screening and Referral Program at a Large US Public Hospital System, 2017.	Berry, Carolyn; Paul, Margaret; Massar, Rachel; Marcello, Roopa Kalyanaraman; Krauskopf, Marian	2020	Not Documented	Yes	Not Documented	Not Documented	Not Documented	Yes
50	A Nurse-Led Intervention to Address Food Insecurity in Chicago.	Grenier, Jennifer; Wynn, Nicole	2018	Yes	Not Documented	Not Documented	Not Documented	Not Documented	Yes
51	Training Student Volunteers as "Community Resource Navigators" to Integrate Health and Social Care in Primary Care.	Gautam, Diwas; Kutzer, Kate; Sandhu, Sahil; Dennis, Erika; Xu, Jacqueline; Blanchard, Lilian; Munoz, Veronica; Drake, Connor; Crowder, Carolyn; Eisenson, Howard; Bettger, Janet	2022	Yes	Not Documented	Not Documented	Not Documented	Not Documented	Not Documented
52	An In-Clinic Food Pharmacy Addresses Very Low Food Security.	Cooper, Emily; Mohanan, Sveta; Garcia, Christina; Thomas, Tamara Baldwin; Ozgun, Holly; Hernandez, Brisa; Cheng, Iris; Cole, Alisahah J.	2020	Not Documented	Not Documented	Not Documented	Not Documented	Not Documented	Not Documented
53	Evidence based processes to prevent readmissions: more is better, a ten-site observational study.	Pugh, Jacqueline; Penney, Lauren S.; Noël, Polly H.; Neller, Sean; Mader, Michael; Finley, Erin P.; Lanham, Holly J.; Leykum, Luci	2021	Yes - on readmissions	Not Documented	Not Documented	Not Documented	Not Documented	Not Documented
54	Unmet Social Needs and No-Show Visits in Primary Care in a US Northeastern Urban Health System, 2018–2019.	Fiori, Kevin P.; Heller, Caroline G.; Rehm, Colin D.; Parsons, Amanda; Flattau, Anna; Braganza, Sandra; Lue, Kelly; Lauria, Molly; Racine, Andrew	2020	Yes - no shows for primary care visits	Not Documented	Not Documented (implications for cost and access mentioned but nit calculated)	Not Documented	Not Documented	Yes, discussed
55	Cooling The Hot Spots Where Child Hospitalization Rates Are High: A Neighborhood Approach To Population Health	Beck, Andrew F; Anderson, Kristy L; Rich, Kate; Taylor, Stuart C; Iyer, Srikant B; Kotagal, Uma R; Kahn, Robert S	2019	Yes	Not Documented	Not documented	Not Documented	Not Documented (but payment models discussed)	Yes, discussed
56	Quantifying Health Systems' Investment In Social Determinants Of Health, By Sector, 2017–19	Horwitz, Leora I; Chang, Carol; Arcilla, Harmony N; Knickman, James R	2020	Not Documented	Not Documented	Not Documented	Not Documented	Not Documented	Yes, discussed
57	Prescribing Housing: A Scoping Review of Health System Efforts to Address Housing as a Social Determinant of Health.	Koeman, Jamison; Mehdipanah, Roshanak	2021	Not Documented	Not Documented	Not Documented	Not Documented	Not Documented	Not Documented
58	The Baltimore Community-Based Organizations Neighborhood Network: Enhancing Capacity Together (CONNECT) Cluster RCT.	Wu, Albert W.; Weston, Christine M.; Ibe, Chidinma A.; Ruberman, Claire F.; Bone, Lee; Boonyasai, Romsai T.; Hwang, Sandra; Gentry, Janice; Purnell, Leon; Lu, Yanyan; Liang, Shuwen; Rosenblum, Michael	2019	Not Documented	Not Documented	Not Documented	Not Documented	Not Documented	Not Documented
59	Effect of Community Health Worker Support on Clinical Outcomes of Low-Income Patients Across Primary Care Facilities: A Randomized Clinical Trial.	Kangovi, Shreya; Mitra, Nandita; Norton, Lindsey; Harte, Rory; Zhao, Xinyi; Carter, Tamala; Grande, David; Long, Judith A.	2018	Not Documented	Not Documented	Not Documented	Not Documented	Not Documented	Not Documented
60	Food for Thought: A Randomized Trial of Food Insecurity Screening in the Emergency Department.	Cullen, Danielle; Woodford, Ashley; Fein, Joel	2019	Not Documented	Not Documented	Not Documented	Not Documented	Not Documented	Not Documented
61	Effect of a Peer-Led Behavioral Intervention for Emergency Department Patients at High Risk of Fatal Opioid Overdose: A Randomized Clinical Trial.	Beaudoin, Francesca L.; Jacka, Brendan P.; Li, Yu; Samuels, Elizabeth A.; Hallowell, Benjamin D.; Peachey, Alyssa M.; Newman, Roxxanne A.; Daly, Mackenzie M.; Langdon, Kirsten J.; Marshall, Brandon D. L.	2022	Not Documented	Not Documented	Not Documented	Not Documented	Not Documented	Not Documented
62	Patient plus partner trial: A randomized controlled trial of 2 interventions to improve outcomes after an initial implantable cardioverter-defibrillator.	Dougherty, Cynthia M.; Thompson, Elaine A.; Kudenchuk, Peter J.	2019	Not documented	Not Documented	Not Documented	Not Documented	Not Documented	Not Documented
63	Illustrating the value of social work: results of an open pilot trial of the psychosocial acuity scale in a large urban pediatric hospital.	Sable, Paige; Ross, Abigail; Clock, Annie; Corder, Brooke; Lamontagne, Nicole; McCaig, Jessica; Shanske, Susan; Tvedte, Matthew; Cummings, Jennifer; Chamorro, Pamela	2021	Not documented	Yes	Not Documented	Not Documented	Not Documented	Not Documented
64	Using Publicly Available Data to Understand the Opioid Overdose Epidemic: Geospatial Distribution of Discarded Needles in Boston, Massachusetts	Bearnot, Benjamin, MD; Pearson, John F, MD; Rodriguez, Jorge A, MD	2018	Not documented	Not Documented	Not Documented	Not Documented	Not Documented	Not Documented
65	Predictors for Poor Linkage to Care Among Hospitalized Persons Living with HIV and Co-Occurring Substance Use Disorder.	Summers, Nathan A.; Colasanti, Jonathan A.; Feaster, Daniel J.; Armstrong, Wendy S.; Rodriguez, Allan; Jain, Mamta K.; Jacobs, Petra; Metsch, Lisa R.; Del Rio, Carlos	2020	Not documented	Not Documented	Not Documented	Not Documented	Not Documented	Not Documented
66	Enhanced care planning and clinical-community linkages versus usual care to address basic needs of patients with multiple chronic conditions: a clinician-level randomized controlled trial.	Krist, Alex H.; O'Loughlin, Kristen; Woolf, Steven H.; Sabo, Roy T.; Hinesley, Jennifer; Kuzel, Anton J.; Rybarczyk, Bruce D.; Kashiri, Paulette Lail; Brooks, E. Marshall; Glasgow, Russel E.; Huebschmann, Amy G.; Liaw, Winston R.	2020	Not documented	Not Documented	Not Documented	Not Documented	Not Documented	Not Documented
67	Social Risks Among Primary Care Patients in a Large Urban Health System.	Heller, Caroline G.; Parsons, Amanda S.; Chambers, Earle C.; Fiori, Kevin P.; Rehm, Colin D.	2020	Not Documented	Not Documented	Not Documented	Not Documented	Not Documented	Not Documented
68	Relationship of Neighborhood Deprivation and Outcomes of a Comprehensive ST-Segment-Elevation Myocardial Infarction Protocol.	Huded, Chetan P.; Dalton, Jarrod E.; Kumar, Anirudh; Krieger, Nikolas I.; Kassis, Nicholas; Phelan, Michael; Kravitz, Kathleen; Reed, Grant W.; Krishnaswamy, Amar; Kapadia, Samir R.; Khot, Umesh	2021	Not Documented	Not Documented	Not Documented	Not Documented	Yes	Yes
69	Enhancing Reach Out and Read With a Video and Text Messages: A Randomized Trial in a Low-Income Predominantly Latino Sample.	Jimenez, Manuel E.; Crabtree, Benjamin F.; Hudson, Shawna V.; Mendelsohn, Alan L.; Lima, Daniel; Shelton, Patricia A.; Veras, Julissa; Lin, Yong; Pellerano, Maria; Morrow, Lesley; Strom, Brian L.	2021	Yes	Not Documented	Not Documented	Not Documented	Yes - assessed risk for developmental delay	Not Documented
70	Social Needs Screening in Hospitalized Pediatric Patients: A Randomized Controlled Trial.	Lopez, Michelle A.; Yu, Xian; Hetrick, Rebecca; Raman, Shivani; Lee, Jessica; Hall, Julie; Tran, Katherine; Vonasek, Bryan; Garg, Arvin; Raphael, Jean; Bocchini, Claire	2023	Yes	Not Documented	Not Documented	Not Documented	Not Documented	Not Documented

## Sheet: Review Questions Q2-Q4
				Review Question 2: SDOH number and Type		Review Question 3: Outcome Measure Types				Review Question 4: Attention to Health Disparities or Health Equity
Record #	Article Name	Author	Year	Number of SDOHs addressed (indicate 1, 2, 3, etc.)	Types of SDOH addressed (Write out)	Includes clinical outcomes (Yes/No)	List of Clinical Outcomes (Indicate N/A or List Out)	Includes Social (SDOH) Outcomes (Yes/No)	List of Social Outcomes (Indicate N/A or List Out)	Specifically Includes outcome measures of health equity and/or health disparities (YES/NO)	List of Equity or Disparity measures (Indicate N/A or List Out)
1	Missed psychosocial risk factors during routine preoperative evaluations are associated with increased complications after elective cancer surgery.	Meyers, Patrick M.; Leeds, Ira L.; Enumah, Zachary O.; Burkhart, Richard A.; He, Jin; Haut, Elliott R.; Efron, Jonathan E.; Johnston, Fabian M.	2019	6	pyschosocial risk factors including depression, smoking, alcohol, low resourcefullness,	Yes	postoperative complication rates, the impact of missing risk factors,	No	No	No	No
2	Outpatient Palliative Care for Noncancer Illnesses: One Program's Experience with Implementation, Impact, and Lessons Learned.	Bischoff, Kara E.; Lin, Joseph; Cohen, Eve; O'Riordan, David L.; Meister, Sarah; Zapata, Carly; Sicotte, Jeffrey; Lindenfeld, Paul; Calton, Brook; Pantilat, Steven Z.	2022	4	Family Caregiver Support; psychosocial distress; spiritual needs; healthcare access and coordination	Yes	Healthcare utilization; advance care planning outcomes	No	N/A	No	N/A
3	Financial Incentives for Smoking Cessation in Hospitalized Patients: A Randomized Clinical Trial.	Ladapo, Joseph A.; Tseng, Chi-Hong; Sherman, Scott E.	2020	1	Low-income	Yes	1) Bioconfirmation of tobacco abstinence at 6 months after hospital discharge; 2) Use of Evidence-based Smoking Cessation Therapy After Hospital Discharge	No	N/A	No	N/A
4	Real-World Disparities in Remote Follow-Up of Cardiac Implantable Electronic Devices and Impact of the COVID-19 Pandemic: A Single-Center Experience.	Lehmann, H. Immo; Sharma, Krishan; Bhatia, Roma; Mills, Theresa; Lang, Joshua; Li, Guoping; Andrews, Carl; Cullivan, Jay; Singh, Jagmeet; Mela, Theofanie	2023	5	Race/ethnicity, income, education, ancestry, spoken language	Yes	Use of Remote monitoring (RM+) and Use of Online Patient Portal	Yes	Use of RM by race, education, income, ancestry	Yes	Disparities in use of RM by race, education, income, ancestry
5	Implementing an EHR-based Screening and Referral System to Address Social Determinants of Health in Primary Care.	Buitron de la Vega, Pablo; Losi, Stephanie; Sprague Martinez, Linda; Bovell-Ammon, Allison; Garg, Arvin; James, Thea; Ewen, Alana M.; Stack, Marna; DeCarvalho, Heloisa; Sandel, Megan; Mishuris, Rebecca G.; Deych, Stella; Pelletier, Patrick; Kressin, Nancy R.	2019	Multiple	Examples: Employment (12%), food insecurity (11%), and problems affording medications (11%) were the most prevalent concerns among respondents.	No	N/A	Yes, but only measures of process associated with screening for SDOH are included. This is an observational study. SDOH screening was goal of study; referrals were provided for social needs identified; however, this was about studying the processess; there were no specific interventions conducted to address SDOH; correspondingly, there were no social outcomes per se	Employment, Food Insecurity; Medication affodability, etc.	No	N/A
6	Documentation and review of social determinants of health data in the EHR: measures and associated insights.	Wang, Michael; Pantell, Matthew S.; Gottlieb, Laura M.; Adler-Milstein, Julia	2021	Multiple	Housing, transportation, food insecurity,financial strain	No	no	No	No	No	No
7	Effect of Community Health Workers on 30-Day Hospital Readmissions in an Accountable Care Organization Population: A Randomized Clinical Trial.	Carter, Jocelyn; Hassan, Susan; Walton, Anne; Yu, Liyang; Donelan, Karen; Thorndike, Anne N.	2021	Multiple	Clinical access, access to social resources, assistance with transportation, psychosocial support, health coaching, using motivational interviewing, goal-setting, and other behavioral strategies.	Yes	The primary outcome was 30-day hospital readmissions. Secondary outcomes included 30-day missed primary care physician or specialty appointments.	No	N/A	No	N/A
8	The impact of enhancing self-management support for diabetes in Community Health Centers through patient engagement and relationship building: a primary care pragmatic cluster-randomized trial.	Hessler, Danielle; Fisher, Lawrence; Dickinson, Miriam; Dickinson, Perry; Parra, José; Potter, Michael B.	2022	8	Actionable social risks (e.g., food insecurity, housing instability); psychological outcomes (health distress, depression symptoms);	Yes	Behavioral self-management for Diabetes (e.g., diet, physical activity, medication taking)	Yes	Measured by four items (yes/no) to assess current experience: (a) “Running out of food before having enough money or food stamps to buy more”, (b) “Problems paying bills, like electric, gas, water, or phone bills”, (c) “Not having enough money to pay for bus fare or access to reliable transportation to medical appointments”, and (d) “Unstable housing including eviction, foreclosure, homelessness …	No	No
9	Online Telehealth Delivery of Group Mental Health Treatment Is Safe, Feasible, and Increases Enrollment and Attendance in Post-9/11 U.S. Veterans.	Fortier, Catherine B.; Currao, Alyssa; Kenna, Alexandra; Kim, Sahra; Beck, Brigitta M.; Katz, Dylan; Hursh, Colleen; Fonda, Jennifer R.	2022	3	Social isolation; Social support; social cohesion;	Yes	PTSD Severity; Depression; Anxiety; Stress; Neurobehavioral symptoms; Functional status; Satisfaction With Life Scale; Civilian reintegration status	Yes	Veteran-to-veteran support; Group cohesion; veteran engagament	No	No
10	Computerized Intervention in Primary Care for Women Veterans with Sexual Assault Histories and Psychosocial Health Risks: a Randomized Clinical Trial.	Creech, Suzannah K.; Pulverman, Carey S.; Kahler, Christopher W.; Orchowski, Lindsay M.; Shea, M. Tracie; Wernette, Golfo Tzilos; Zlotnick, Caron	2022	3	Psychosocial health risks (primary outcome);	Yes	Improved mental health care utilization (secondary outcome)	Yes	PTSD, hazardous drininking and Intimate Partner Violence	No	No
11	Bridge to Health/Puente a la Salud: a pilot randomized trial to address diabetes self-management and social needs among high-risk patients.	Fitzpatrick, Stephanie L.; Papajorgji-Taylor, Dea; Schneider, Jennifer L.; Lindberg, Nangel; Francisco, Melanie; Smith, Ning; Vaughn, Katie; Vrany, Elizabeth A.; Hill-Briggs, Felicia	2022	4	Insufficient housing; Financial hardship; Food insecurity; Lack of transportation	Yes	Mean A1C Level	No (feasibility trial; only referral practices by CHWs to address participant social needs are documented)	N/A	No (Target population is low-income, minority community, but does not include outcome measures of health disparity or equity)	N/A
12	Impact of a Low-Intensity Resource Referral Intervention on Patients' Knowledge, Beliefs, and Use of Community Resources: Results from the CommunityRx Trial.	Tung, Elizabeth L.; Abramsohn, Emily M.; Boyd, Kelly; Makelarski, Jennifer A.; Beiser, David G.; Chou, Chiahung; Huang, Elbert S.; Ozik, Jonathan; Kaligotla, Chaitanya; Lindau, Stacy Tessler	2020	5	social, environmental, and behavioral conditions outside the healthcare system: income; housing insecurity; food insecurity; health behaviors, including diet, physical activity, and smoking	Yes	Depression; Diabetes; heart disease; hypertension; obesity	No; Only assesses participants' knowledge of community resources that they received referrals for from the Communiyty Rx system	N/A	No; targeted towards publicly insured, low income, at-risk population, but does not specifically include measures of health disparity or equity	No
13	Patient navigation to address sociolegal barriers for patients with cancer: A comparative-effectiveness study.	Battaglia, Tracy A.; Gunn, Christine M.; Bak, Sharon M.; Flacks, JoHanna; Nelson, Kerrie P.; Wang, Na; Ko, Naomi Y.; Morton, Samantha J.	2022	5	Socio-legal barriers; language barriers; Sociolegal barriers to cancer care are defined as health-related social needs like affordable healthy housing, stable utility service, and food security that may be remedied by public policy, law, regulation, or programming. Legal support has not been studied in cancer care.	yYes	The primary outcome was timely treatment within 90 days of diagnosis. Secondary outcomes included patient-reported outcomes (distress, cancer-related needs, and satisfaction with navigation) at baseline and at 6 months.	Yes	5 I-HELP categories (income support, housing/utilities, education/employment, legal status/immigration, and personal/family safety)	No; targeted towards miniority non-english speaking population on public insurance, facing one or more perceived sociolegal barrier such as housing and employment, but does not specifically include measures of health disparity or equity	N/A
14	Nurse-led hospital-to-community care, clinical outcomes for people living with HIV and health-related social needs	Moen, Marik; Doede, Megan; Johantgen, Meg; Taber, Deborah; Adesanya, Ikmat; Werthman, Emily; Friedmann, Erika	2022	Multiple Health Related Social Needs HRSNs	Education; Unemployed; Transportation; Race/Ethnicity; Gender; Housing; Insurance; Mental Health; SUD	Yes	HIV appointment; Viral suppression; ≥2 ED visits; ≥Hospitalizations	No	No	No	N/A
15	Improving Diabetes Care Through Population Health Innovations and Payments: Lessons from Western Maryland.	Wang, Gary X.; Gauthier, Richard; Gunter, Kathryn E.; Johnson, Lori; Zhu, Mengqi; Wan, Wen; Tanumihardjo, Jacob P.; Chin, Marshall H.	2023	Multiple	Unmet social needs; food housing, transportion, etc.	Yes	PROs and utilization outcomes	No	N/A	No	N/A
16	Financing Diabetes Care in the U.S. Health System: Payment Innovations for Addressing the Medical and Social Determinants of Health.	Saulsberry, Loren; Peek, Monica	2019	1	health insurances	No	no	No	No	No	No
17	Clinical and Sociobehavioral Prediction Model of 30-Day Hospital Readmissions Among People With HIV and Substance Use Disorder: Beyond Electronic Health Record Data.	Nijhawan, Ank E.; Metsch, Lisa R.; Zhang, Song; Feaster, Daniel J.; Gooden, Lauren; Jain, Mamta K.; Walker, Robrina; Huffaker, Shannon; Mugavero, Michael J.; Jacobs, Petra; Armstrong, Wendy S.; Daar, Eric S.; Sullivan, Meg; Del Rio, Carlos; Halm, Ethan A.	2019	2	food insecurity and readiness for substance use treatment	Yes	30-day readmissions among HIV-positive substance users, including sociobehavioral and clinical variables.	Yes	Food insecurity	No	N/A
18	Effects of a standardized community health worker intervention on hospitalization among disadvantaged patients with multiple chronic conditions: A pooled analysis of three clinical trials.	Vasan, Aditi; Morgan, John W.; Mitra, Nandita; Xu, Chang; Long, Judith A.; Asch, David A.; Kangovi, Shreya	2020	4	The IMPaCT intervention consists of three stages: goal‐setting, tailored support, and connection with long‐term support. At the time of enrollment, CHWs used a semi‐structured interview guide to get to know patients and understand the factors impacting their health, including social and behavioral determinants of health such as food insecurity, housing instability, drug and alcohol use, and prese…	Yes	Hospitalizations and Length of Stay; and Readmissions	No	N/A	No	N/A
19	Screening for health-related social needs in the emergency department: Adaptability and fidelity during the COVID-19 pandemic.	Murray, Evangelia; Roosevelt, Genie E.; Vogel, Jody A.	2022	5	1. food insecurity 2. Housing instability 3. Transportation needs 4.Utility assistance 5. interpersonal safety	No	N/A	Yes	identification of health-related social needs (HRSN), such as food insecurity, housing instability, transportation needs, utility assistance, and interpersonal safety, among patients in the emergency department (ED) before and during the COVID-19 pandemic.	No	N/A
20	Food Insecurity in Older Adults in an Integrated Health Care System	Steiner JF, Stenmark SH, Sterrett AT, Paolino AR, Stiefel M, Gozansky WS, Zeng C.	2018	1	Food insecurity	No	N/A	Yes	Food insecurity	No	N/A
21	Development and Implementation of a Maryland State Program Providing Hospital Payment Incentives for Reduction in Readmission Disparities.	Rice, Kyle; Schuster, Alyson; Pack, Allan; Dougherty, Geoff B.	2023	3	1. Medicaid coverage 2. Race 3.Area Deprivation Index	Yes	does not provide a specific list of clinical outcomes associated with the program. It mentions that Maryland's Readmission Reduction Incentive Program (RRIP) evaluates unplanned 30-day readmissions, but it does not list specific clinical outcomes.	No	N/a	Yes	It discusses the development of the program and the methodology for measuring hospital-level disparity in readmission but does not list specific equity or disparity measures.
22	Implementation fidelity to a behavioral diabetes prevention intervention in two New York City safety net primary care practices.	Gupta, Avni; Hu, Jiyuan; Huang, Shengnan; Diaz, Laura; Gore, Radhika; Levy, Natalie; Bergman, Michael; Tanner, Michael; Sherman, Scott E.; Islam, Nadia; Schwartz, Mark D.	2023	3	Social needs to effectively self manage diabetes; Referrals by CHWs as needed to hospital or community-based programs to help support behavioral change or address identified social needs.	Yes	Diabetes self-management; Healthcare utilization	No	N/A	No	N/A
23	Implementing CenteringPregnancy Group Prenatal Care for Minority Women Living with HIV at an Urban University Hospital.	Potter, JoNell E.; Duthely, Lunthita M.; Diaz-Mendez, Nelly; Smith, Lindsay; Messick, Barbara J.; Echenique, Maria; Galli, Johnny; Yasin, Salih; Villar-Loubet, Olga	2019	2	1. HIV Diagnosis and Healthcare Access 2. Social Support	Yes	perinatal outcomes among women with HIV who received prenatal care in a group setting	Yes	prenatal care in fostering social support and patient engagement to improve adherence to health regimens and promote healthy outcomes for both women and newborns.	No	n/a
24	Management of Isolated Skull Fractures in Pediatric Patients: A Systematic Review.	Donaldson, Katelyn; Li, Xun; Sartorelli, Kennith H.; Weimersheimer, Peter; Durham, Susan R.	2019	3	1. Income and Socioeconomic Status 2. Education 3. Access to Healthcare	Yes	n/a	Yes	N/A	Yes	N/a
25	Health Center-Based Community-Supported Agriculture: An RCT.	Berkowitz, Seth A.; O'Neill, Jessica; Sayer, Edward; Shahid, Naysha N.; Petrie, Maegan; Schouboe, Sophie; Saraceno, Megan; Bellin, Rochelle	2019	11	Food insecurity; patient-reported psychosocial outcomes;	Yes	Healthy Eating Index; HBA1C; BMI	Yes	Race/Ethnicity; Education; Ratio of income to federal poverty guideline; Born in U.S.; Receiving SNAP benefits; Food insecure; Cost-related medication underuse; Put off buying medications to afford food; PROMIS-10 global raw score; PROMIS 4-item depression raw score; PROMIS 4-item anxiety raw score	No	N/A
26	Effects of In-Person Assistance vs Personalized Written Resources About Social Services on Household Social Risks and Child and Caregiver Health: A Randomized Clinical Trial.	Gottlieb, Laura M.; Adler, Nancy E.; Wing, Holly; Velazquez, Denisse; Keeton, Victoria; Romero, Abigail; Hernandez, Maricarmen; Munoz Vera, Andrea; Urrutia Caceres, Elizabeth; Arevalo, Catherine; Herrera, Philip; Bernal Suarez, Mara; Hessler, Danielle	2020	18: The 18-item social risk screening questionnaire was based on surveys used in earlier studies25,26 and included items on housing stability and habitability, food and income security, child care and transportation needs, employment, legal concerns, medical insurance, and other public benefits enrollment	Childhood social and economic risk factors		Child and caregiver health outcomes: childhood behavioral problems, cognitive delay, unhealthy weight, and asthma, as well as adult obesity, diabetes, and cardiovascular disorders	Childhood social and economic adversity, such as food insecurity and housing instability, is associated with significant short- and long-term health risks, including higher likelihood of childhood behavioral problems, cognitive delay, unhealthy weight, and asthma, as well as adult obesity, diabetes, and cardiovascular disorders.1,2,3,4,5,6,7,8,9,10,11,12,13,14,15 Moreover, cumulative exposure to …	Top 3 reported social risks are assessed pre and post intervention; Caregiver-reported number of social risk factors and child health 6 months after enrollment.	No	No
27	Feasibility of a family-centered intervention for depressed older men in primary care.	Hinton, Ladson; La Frano, Erika; Harvey, Danielle; Alfaro, Eduardo Delgadillo; Kravitz, Richard; Smith, Andrew; Apesoa-Varano, Ester Carolina; Jafri, Asma; Unutzer, Jurgen	2019	3	Family support; Language; Ethnicity	Yes	Depression PH-9	No (intervention was a family-ceneteerd depression clinic for spanish and english speaking adults in a primary care clinic)	N/A	No	N/A
28	Intensive care management for high-risk veterans in a patient-centered medical home - do some veterans benefit more than others?	Swankoski, Kaylyn E.; Reddy, Ashok; Grembowski, David; Chang, Evelyn T.; Wong, Edwin S.	2023	6+	travel distance, copay exemption, risk score for future hospitalizations, history of hospital discharge against medical advice, homelessness, and multiple residence ZIP codes.	Yes	Risk for ED use and hospitalization	No	N/A	No	N/A
29	Pragmatic Clinical Trial to Improve Patient Experience Among Adults During Transitions from Hospital to Home: the PArTNER study.	LaBedz, Stephanie L.; Prieto-Centurion, Valentin; Mutso, Amelia; Basu, Sanjib; Bracken, Nina E.; Calhoun, Elizabeth A.; DiDomenico, Robert J.; Joo, Min; Pickard, A. Simon; Pittendrigh, Barry; Williams, Mark V.; Illendula, Sai; Krishnan, Jerry A.	2022	3	Social health & social support measures: emotional, instrumental, and informational support	Yes healthcare utilization measures	ED visits and readmissions	Yes	PROMIS measures of Social health; informational support; emotional support; instrumental support	No; conducted at MSH facility but specific measures of health equity were not included	No
30	Medical-Legal Partnership Effects on Mental Health, Health Care Use, and Quality of Life in Primary Care: A Randomized Clinical Trial.	Liaw, Winston; Northrup, Thomas F.; Stotts, Angela L.; Bakos-Block, Christine; Suchting, Robert; Chen, Alvin; Hernandez, Abigail; Finzetto, Lisandra; Green, Charles; Murphy, Thomas	2023	1	Health Harming Legal Needs (HHLN)	Yes	The primary outcome was stress (6 months) as measured by the Perceived Stress Scale (PSS). Secondary measures included the Center for Epidemiologic Studies Depression Scale; Generalized Anxiety Disorder scale (GAD-7); Patient-Reported Outcomes Measurement Information System (PROMIS); and emergency department (ED), urgent care, and hospital visits.	No	N/A	No	N/A
31	Predictive Model-Driven Hotspotting to Decrease Emergency Department Visits: a Randomized Controlled Trial.	Post, Brady; Lapedis, Jeremy; Singh, Karandeep; Valenstein, Paul; Büyüktür, Ayşe G.; Teske, Karin; Ryan, Andrew M.	2021	Multiple	Social needs that may place adults at high risk for ED utilization, including food and housing insecurity	Yes	High risk for ED utilization based on social needs	No	N/A	No	N/A
32	A care coordinator screening strategy to address health harming legal needs	Berg, Daniel; Setrini, Alice; Chan, Kathy; Cibulskis, Ann; Ameji, Kulsum; Hinami, Keiki	2022	8	Solutions for Health Harming Legal Needs	Yes	n/A	Yes	1.public benefits like disability entitlements and insurance 2. emotional support through a difficult legal process	No	No
33	Evidence that collaborative action between local health departments and nonprofit hospitals helps foster healthy behaviors in communities: a multilevel study	Geri Rosen Cramer; Young, Gary J; Singh, Simone; McGuire, Jean; Kim, Daniel	2021	1	Community Health Needs	No	n/A	Yes	Improved outcomes after community health needs were assessed with lifestyle changes	No	N/A
34	Hospital Partnerships for Population Health: A Systematic Review of the Literature	Hilts Katy Ellis; Yeager, Valerie A; Joseph, Gibson P; Halverson, Paul K; Blackburn, Justin; Menachemi Nir	2021	4	community health needs assessment, care coordination/transition, health and wellness, public health activities	No	n/A	No	N/A	No	N/A
35	Medicaid Investments To Address Social Needs In Oregon And California	Alderwick, Hugh; Hood-Ronick, Carlyn M; Gottlieb, Laura M	2019	4	Care coordination, Housing, Food insecurity, Legal needs	No	n/A	Yes	Care coordination, Housing, Food insecurity, Legal needs	No	N/A
36	Enabling Services Improve Access To Care, Preventive Services, And Satisfaction Among Health Center Patients	Yue, Dahai; Pourat, Nadereh; Chen, Xiao; Lu, Connie; Zhou, Weihao; Daniel, Marlon; Hoang, Hank; Sripipatana, Alek; Ponce, Ninez A	2019	6	race, age, ethnicity, english proficiency, education, income and mental health	Yes	n	No	N/A	Yes	No- disparities addressed in the discussion section
37	A Social-Return-On-Investment Analysis Of Bon Secours Hospital's 'Housing For Health' Affordable Housing Program	Drabo, Emmanuel Fulgence; Eckel, Grace; Ross, Samuel L; Brozic, Michael; Carlton, Chanie G; Warren, Tatiana Y; Kleb, George; Laird, Aurelia; Porter, Keshia M Pollack; Pollack, Craig Evan	2021	3	Economic stability, Neighborhood and Built Environment(Affordable housing), Social and Community Context	No	N/A	Yes	SROI, Reduced neighborhood crime, increased safety, improved community well-being, reduced homelessness, increased housing stability, increased property values in the surrounding neighborhoods, reduced loneliness among seniors, and reduced vacant residential properties in the neighborhood	Yes	Reduced neighborhood crime, increased safety, improved community well-being, reduced homelessness, increased housing stability, increased property values in the surrounding neighborhoods, reduced loneliness among seniors, and reduced vacant residential properties in the neighborhood
38	Embedding Social Workers In Veterans Health Administration Primary Care Teams Reduces Emergency Department Visits	Cornell, Portia Y; Halladay, Christopher W; Ader, Joseph; Halaszynski, Jaime; Hogue, Melinda; McClain, Cristian E; Silva, Jennifer W; Taylor, Laura D; Rudolph, James L	2020	1	Care coordination for high-risk, high-need populations .	Yes	Patients' use of social work services, hospital admissions, and emergency department visits	No	N/A	No	N/A
39	Project Nurture Integrates Care And Services To Improve Outcomes For Opioid-Dependent Mothers And Their Children	McConnell, K John; Kaufman, Menolly R; Grunditz, Jenny I; Bellanca, Helen; Risser, Amanda; Rodriguez, Maria I; Renfro, Stephanie	2020	3	1.The integration of care and services 2. coordination between sectors 3. Improving outcomes for opioid-dependent mothers and their children	Yes	• Increases in prenatal visits • Maternal lengths-of-stay in the hospital • Newborn outcomes, such as preterm birth, low birthweight, or high-needs care.	Yes	• Reductions in child maltreatment and placement of children in foster care were observed among opioid-dependent women enrolled in Medicaid and served by Project Nurture, compared to those not served by the project.	No	N/A
40	Addressing the Poverty Barrier in Collaborative Care for Adults Experiencing Homelessness: A Case-Based Report	Cabán-Alemán Carissa; Iobst Saraswati; Luna, Aniuska M; Foster, Adriana	2020	3	Homelessness, Food insecurity, Unemployment	Yes	Depression PHQ-9 scoring	Yes	Access to healthcare, Patient satisfaction, Quality of life, Reduced food insecurity	Yes	N/A
41	Interprofessional, multitiered daily rounding management in a high-acuity hospital	Eamranond, Pracha Peter; Bhukhen, Arti; DiPalma, Donna; Schawan Kunuakaphun; Burke, Thomas; Rodis, John; Grey, Michael	2020	1	Hospital Safety	Yes	Precursor Safety Events(PSE) and Serious Safety Events(SSE), Length of stay Observed to Expected(O/E), Health asssociated Infections (HAIs), Hospital acquired pressure ulcers and several HCAHPS measures.	Yes	Patient experience of care	No	N/A
42	Indianapolis Provider's Use Of Wraparound Services Associated With Reduced Hospitalizations And Emergency Department Visits	Vest, Joshua R; Harris, Lisa E; Haut, Dawn P; Halverson, Paul K; Menachemi, Nir	2018	5	Mental health needs, Nutritional needs, Access to care, social issues affecting health, healthcare spending	Yes	Subsequent hospitalizations and emergency department visits	Yes	Hospitalization costs	No	N/A
43	Reasons for Social Work Referrals in an Urban Safety-Net Population: A Natural Language Processing and Market Basket Analysis Approach.	Bako, Abdulaziz T.; Walter-McCabe, Heather; Kasthurirathne, Suranga N.; Halverson, Paul K.; Vest, Joshua R.	2021	17	Financial, Food/Food Insecurity, Violence and Safety, Housing, Legal, Transportation, Behavioral Health, Aging, Education, Employment, Family/Social Support, Pregnancy, Language services, Disability, Community Resources, Adherence to treatment	No	N/A	No	N/A	No	N/A
44	The Impact of Food Insecurity Screenings and Community Food Resource Referrals for Patients with Type 2 Diabetes.	Ofili, Miriam Ngozi; Lawson, Robin M.	2020	1	Food Insecurity	Yes	Hemoglobin A1c (HbA1c) levels	Yes	Utlization of community food resource and satisfaction	No	N/A
45	The implementation cost of a safety‐net hospital program addressing social needs in Atlanta.	MacLeod, Kara E.; Chapel, John M.; McCurdy, Matthew; Minaya‐Junca, Jasmin; Wirth, Diane; Onwuanyi, Anekwe; Lane, Rashon I.	2021	Multiple	Social needs including social support, housing, financial strain and problems, and transportation (Basically, socioeconomic barriers to treatment plan adherence)	Yes	Reduced hospital readmissions, Reduced hospital length of stay and the use of emergency departments	Yes	Easier future access to healthcare services, Access to transportation, Access to healthcare when confined at home, Access to and use of community services	Yes	Greater equity due to: -Better access to prescribed medications, -Better access and continuity of care -Greater ability to keep appointments -Greater ability to receive treatment at home -Increased use of community services
46	Development of a homelessness risk screening tool for emergency department patients.	Doran, Kelly M.; Johns, Eileen; Zuiderveen, Sara; Shinn, Marybeth; Dinan, Kinsey; Schretzman, Maryanne; Gelberg, Lillian; Culhane, Dennis; Shelley, Donna; Mijanovich, Tod	2022	1	Homelessness	No	N/A	No	N/A	No	N/A
47	An embedded multiple case study: using CFIR to map clinical food security screening constructs for the development of primary care practice guidelines.	Taher, Sabira; Muramatsu, Naoko; Odoms-Young, Angela; Peacock, Nadine; Michael, C. Fagen; Courtney, K. Suh	2022	1	Food Insecurity	No	N/A	Yes	Number of patients referred to the food assistance interven‐ tion, Number of patients that participated in the food assistance intervention	No	N/A
48	Conceptualizing the effective mechanisms of a social needs case management program shown to reduce hospital use: a qualitative study.	Fleming, Mark D.; Safaeinili, Nadia; Knox, Margae; Hernandez, Elizabeth; Esteban, Emily E.; Sarkar, Urmimala; Brewster, Amanda L.	2022	Multiple	Not specified; social needs such as housing, food, transportation, and income	Yes	Inpatient hospital admission	No		No	N/A
49	Social Needs Screening and Referral Program at a Large US Public Hospital System, 2017.	Berry, Carolyn; Paul, Margaret; Massar, Rachel; Marcello, Roopa Kalyanaraman; Krauskopf, Marian	2020	8	food insecurity, health insurance coverage, housing concerns, public income benefits, household interpersonal violence, adult education and literacy, daycare, and general & immigration legal problems)	No	N/A	No	N/A	No	N/A
50	A Nurse-Led Intervention to Address Food Insecurity in Chicago.	Grenier, Jennifer; Wynn, Nicole	2018	2	Food Insecurity and Environmental Waste (Food waste)	No	N/A	Yes	Hunger relief, Landfill reduction	No	N/A
51	Training Student Volunteers as "Community Resource Navigators" to Integrate Health and Social Care in Primary Care.	Gautam, Diwas; Kutzer, Kate; Sandhu, Sahil; Dennis, Erika; Xu, Jacqueline; Blanchard, Lilian; Munoz, Veronica; Drake, Connor; Crowder, Carolyn; Eisenson, Howard; Bettger, Janet	2022	Multiple	Not specified; any unmet social needs such as food, transportation, housing identified using the PREPARE screening tool	No	N/A	Yes	(1) number of patients referred to follow-up who were successfully reached via phone by student volunteers; (2) number of patients who attempted to contact a referred resource; and (3) number of patients who successfully connected with a referred resource.	No	N/A
52	An In-Clinic Food Pharmacy Addresses Very Low Food Security.	Cooper, Emily; Mohanan, Sveta; Garcia, Christina; Thomas, Tamara Baldwin; Ozgun, Holly; Hernandez, Brisa; Cheng, Iris; Cole, Alisahah J.	2020	1	Food Insecurity	No	N/A	No	N/A	No	N/A
53	Evidence based processes to prevent readmissions: more is better, a ten-site observational study.	Pugh, Jacqueline; Penney, Lauren S.; Noël, Polly H.; Neller, Sean; Mader, Michael; Finley, Erin P.; Lanham, Holly J.; Leykum, Luci	2021	Multiple	Unmet social needs; food housing, transportion, etc.	Yes	Readmissions	No	N/A	No	N/A
54	Unmet Social Needs and No-Show Visits in Primary Care in a US Northeastern Urban Health System, 2018–2019.	Fiori, Kevin P.; Heller, Caroline G.; Rehm, Colin D.; Parsons, Amanda; Flattau, Anna; Braganza, Sandra; Lue, Kelly; Lauria, Molly; Racine, Andrew	2020	Multiple	Unmet social needs; food housing, transportion, etc.	Yes	No-shows	No	N/A	No	N/A
55	Cooling The Hot Spots Where Child Hospitalization Rates Are High: A Neighborhood Approach To Population Health	Beck, Andrew F; Anderson, Kristy L; Rich, Kate; Taylor, Stuart C; Iyer, Srikant B; Kotagal, Uma R; Kahn, Robert S	2019	Multiple	Social risk	Yes	Child hospitalization rates	No	N/A	Yes	Finally, we assessed the degree to which the efforts narrowed equity gaps relative to the rest of the county. For the baseline period, Avondale had the fourth-highest and Price Hill the eleventh-highest inpatient bed-day rates out of eighty county neighborhoods. In that period Avondale and Price Hill children spent 2,720 days in the hospital, compared to 2,145 in the improvement period (July 2015…
56	Quantifying Health Systems' Investment In Social Determinants Of Health, By Sector, 2017–19	Horwitz, Leora I; Chang, Carol; Arcilla, Harmony N; Knickman, James R	2020	6	Housing, food, employment, transportation, education, social and community context	No	N/A	No	N/A	No	N/A
57	Prescribing Housing: A Scoping Review of Health System Efforts to Address Housing as a Social Determinant of Health.	Koeman, Jamison; Mehdipanah, Roshanak	2021	1	Housing	No	N/A	Yes	Housing	No	N/A
58	The Baltimore Community-Based Organizations Neighborhood Network: Enhancing Capacity Together (CONNECT) Cluster RCT.	Wu, Albert W.; Weston, Christine M.; Ibe, Chidinma A.; Ruberman, Claire F.; Bone, Lee; Boonyasai, Romsai T.; Hwang, Sandra; Gentry, Janice; Purnell, Leon; Lu, Yanyan; Liang, Shuwen; Rosenblum, Michael	2019	Multiple	Housing, food, transportation, etc.	Yes healthcare utilization measures	ED visits and hospitalization	Yes	Housing, food, transportation, etc.	No	N/A
59	Effect of Community Health Worker Support on Clinical Outcomes of Low-Income Patients Across Primary Care Facilities: A Randomized Clinical Trial.	Kangovi, Shreya; Mitra, Nandita; Norton, Lindsey; Harte, Rory; Zhao, Xinyi; Carter, Tamala; Grande, David; Long, Judith A.	2018	Multiple	Health literacy, unmet social need, social support, etc.		Chronic disease control goals; tobacco dependence	Yes	Health literacy, unmet social need, social support, delayed health need etc.	No	N/A
60	Food for Thought: A Randomized Trial of Food Insecurity Screening in the Emergency Department.	Cullen, Danielle; Woodford, Ashley; Fein, Joel	2019	Single	Food insecurity	No	N/A	Yes	Food insecurity	No	N/A
61	Effect of a Peer-Led Behavioral Intervention for Emergency Department Patients at High Risk of Fatal Opioid Overdose: A Randomized Clinical Trial.	Beaudoin, Francesca L.; Jacka, Brendan P.; Li, Yu; Samuels, Elizabeth A.; Hallowell, Benjamin D.; Peachey, Alyssa M.; Newman, Roxxanne A.; Daly, Mackenzie M.; Langdon, Kirsten J.; Marshall, Brandon D. L.	2022	Not specified	Not specified	Yes	They mentioned that ED-based behavioral intervention is likely effective in promoting treatment engagement but that the person delivering the intervention may have less influence regarding the likelihood of a patient entering treatment immediately after the ED visit.	No	no	no	no
62	Patient plus partner trial: A randomized controlled trial of 2 interventions to improve outcomes after an initial implantable cardioverter-defibrillator.	Dougherty, Cynthia M.; Thompson, Elaine A.; Kudenchuk, Peter J.	2019	Not specified	Not specified	no	no	yes	physical functioning in the patient with an ICD (patient concerns/symptoms, general health, ICD shocks) and in the partner (partner concerns/symptoms, general health); b) psychological adjustment (anxiety and depression) in both the patient and partner; c) relationship impact for the patient (dyadic adjustment) and partner (dyadic adjustment, caregiver burden); d) self-efficacy for both the patie…	No	n/A
63	Illustrating the value of social work: results of an open pilot trial of the psychosocial acuity scale in a large urban pediatric hospital.	Sable, Paige; Ross, Abigail; Clock, Annie; Corder, Brooke; Lamontagne, Nicole; McCaig, Jessica; Shanske, Susan; Tvedte, Matthew; Cummings, Jennifer; Chamorro, Pamela	2021	1, Single - validated psychosocial acuity metric	Psychosocial risk	Yes	Feasibility and acceptability of the validated psychosocial acuity metric	No	N/A	No	N/A
64	Using Publicly Available Data to Understand the Opioid Overdose Epidemic: Geospatial Distribution of Discarded Needles in Boston, Massachusetts	Bearnot, Benjamin, MD; Pearson, John F, MD; Rodriguez, Jorge A, MD	2018	Not documented	N/A	Yes	Discarded needles associated with opioid overdose	No	N/A	No	N/A
65	Predictors for Poor Linkage to Care Among Hospitalized Persons Living with HIV and Co-Occurring Substance Use Disorder.	Summers, Nathan A.; Colasanti, Jonathan A.; Feaster, Daniel J.; Armstrong, Wendy S.; Rodriguez, Allan; Jain, Mamta K.; Jacobs, Petra; Metsch, Lisa R.; Del Rio, Carlos	2020	Multiple	Education, Housing, Insurance	Yes	HIV related clinical outcomes	No. Study assesses SDOH preductors for poor linkage to care but does not capture social outcomes	N/A	No	N/A
66	Enhanced care planning and clinical-community linkages versus usual care to address basic needs of patients with multiple chronic conditions: a clinician-level randomized controlled trial.	Krist, Alex H.; O'Loughlin, Kristen; Woolf, Steven H.; Sabo, Roy T.; Hinesley, Jennifer; Kuzel, Anton J.; Rybarczyk, Bruce D.; Kashiri, Paulette Lail; Brooks, E. Marshall; Glasgow, Russel E.; Huebschmann, Amy G.; Liaw, Winston R.	2020	Multiple	Health Related Social Needs	Yes	Diabetes control; Depression control etc.	Yes	Healthy behavior (diet) captured	No	N/A
67	Social Risks Among Primary Care Patients in a Large Urban Health System.	Heller, Caroline G.; Parsons, Amanda S.; Chambers, Earle C.; Fiori, Kevin P.; Rehm, Colin D.	2020	10	Housing: Quality Housing, Instability, Access to healthcare: Food insecurrity, Health travel, Health cost, Getting along, utilities cost, care need, legal, Interpersonal violence.	No	N/A	No (The study aimed to estimate the prevalence of social risks overall and in different population subgroups, and to identify differences in the prevalence of social risks by subgroup. The study did not assess the impact of social risks on specific health outcomes or measure the effectiveness of interventions targeting social determinants of health.)	N/A	No (While they acknowledge the existence of health disparities and the impact of social determinants on health, they do not provide specific measures or data related to these outcomes.)	N/A
68	Relationship of Neighborhood Deprivation and Outcomes of a Comprehensive ST-Segment-Elevation Myocardial Infarction Protocol.	Huded, Chetan P.; Dalton, Jarrod E.; Kumar, Anirudh; Krieger, Nikolas I.; Kassis, Nicholas; Phelan, Michael; Kravitz, Kathleen; Reed, Grant W.; Krishnaswamy, Amar; Kapadia, Samir R.; Khot, Umesh	2021	1	Socio-economic deprivation	Yes	1. door-to-balloon time (D2BT), which refers to the time from patient arrival at the emergency department (ED) until the time of intracoronary device deployment that restored flow in the culprit vessel . 2. in-hospital mortality, which was recorded prospectively as part of data abstraction for the CathPCI Registry . 3. Use of guideline-directed medical therapy (GDMT) before percutaneous coronary …	No (The study aimed to evaluate whether the comprehensive STEMI protocol improved process and outcome metrics in patients with moderate or high socioeconomic deprivation)	N/A	No	N/A
69	Enhancing Reach Out and Read With a Video and Text Messages: A Randomized Trial in a Low-Income Predominantly Latino Sample.	Jimenez, Manuel E.; Crabtree, Benjamin F.; Hudson, Shawna V.; Mendelsohn, Alan L.; Lima, Daniel; Shelton, Patricia A.; Veras, Julissa; Lin, Yong; Pellerano, Maria; Morrow, Lesley; Strom, Brian L.	2021	1	Early Literacy	No	N/A	Yes	Shared Reading Frequency, StimQ Reading and Parent Verbal Responsivity, Parent Attitudes about reading, Risk for developmental delay	No	N/A
70	Social Needs Screening in Hospitalized Pediatric Patients: A Randomized Controlled Trial.	Lopez, Michelle A.; Yu, Xian; Hetrick, Rebecca; Raman, Shivani; Lee, Jessica; Hall, Julie; Tran, Katherine; Vonasek, Bryan; Garg, Arvin; Raphael, Jean; Bocchini, Claire	2023	Multiple	individual-level adverse SDoH,13 including childcare, education, employment, food, health insurance, housing, PCP, utilities coverage, perceived child and caregiver health, caregiver mental health and safety (depressive symptoms, perceived stress, satisfaction with life, substance abuse, intimate partner violence [IPV]), education, employment, childcare, housing, food, and heating), and past and …	No	N/A	Yes	enrollment in a new community-based resource at the time of the 6-month follow-up call	No	N/A

## Sheet: Review Questions Q5-Q6
Record #	Article Name	Author	Year	Review Question 5: Challenges in addressing SDOH		Review Question 6: Role of Technology in SDOH initiative
				List Challenges reported in addressing SDOH if applicable (Qualitative description needed; Specify if N/A)	List other study methodological challenges if applicable (Qualitative description needed; Specify if N/A)	Specifiy if technology was used to capture SDOH. This would include use of EHRs (Yes/No or N/A)	Specify types of technology used to address SDOH (Qualitative description needed; Specify if N/A)
1	Missed psychosocial risk factors during routine preoperative evaluations are associated with increased complications after elective cancer surgery.	Meyers, Patrick M.; Leeds, Ira L.; Enumah, Zachary O.; Burkhart, Richard A.; He, Jin; Haut, Elliott R.; Efron, Jonathan E.; Johnston, Fabian M.	2019	poor documentation, limited Awareness,		yes	EHR, risk assessment tools, validation instruments
2	Outpatient Palliative Care for Noncancer Illnesses: One Program's Experience with Implementation, Impact, and Lessons Learned.	Bischoff, Kara E.; Lin, Joseph; Cohen, Eve; O'Riordan, David L.; Meister, Sarah; Zapata, Carly; Sicotte, Jeffrey; Lindenfeld, Paul; Calton, Brook; Pantilat, Steven Z.	2022	Not discussed	This study has a number of important limitations. First, it is a single-center study at an academic medical center and thus may not be broadly generalizable to other health systems. Second, it is an uncontrolled cohort study so we can only report associations and cannot make conclusions about causality.	Yes	EHR; Patient-reported outcomes about symptoms and wellbeing are solicited b through the patient portal of the electronic health record (EHR) for telemedicine visits. The ‘‘Symptom & Well-Being Survey’’ includes the Edmonton Symptom Assessment Scale (ESAS). All members of the team review survey responses before visits.
3	Financial Incentives for Smoking Cessation in Hospitalized Patients: A Randomized Clinical Trial.	Ladapo, Joseph A.; Tseng, Chi-Hong; Sherman, Scott E.	2020	Not discussed	No specific methodlogical limitations discussed; Only premise or significance of intervention discussed.	Yes	EHRs and a variety of electronic validated survey instruments; Participants completed a baseline interview at the time of enrollment and follow-up interviews at 2 weeks, 2 months, 6 months, and 12 months. Baseline measures included sociodemographic characteristics; smoking history (i.e., smoking habits and home environment using items adapted from the California Tobacco Survey,29 nicotine depende…
4	Real-World Disparities in Remote Follow-Up of Cardiac Implantable Electronic Devices and Impact of the COVID-19 Pandemic: A Single-Center Experience.	Lehmann, H. Immo; Sharma, Krishan; Bhatia, Roma; Mills, Theresa; Lang, Joshua; Li, Guoping; Andrews, Carl; Cullivan, Jay; Singh, Jagmeet; Mela, Theofanie	2023	Not discussed	This analysis was a single‐center study based on observational, administrative claims data, and therefore the findings of this analysis are subject to coding and reporting bias.	Yes	Patient Portals; EHR
5	Implementing an EHR-based Screening and Referral System to Address Social Determinants of Health in Primary Care.	Buitron de la Vega, Pablo; Losi, Stephanie; Sprague Martinez, Linda; Bovell-Ammon, Allison; Garg, Arvin; James, Thea; Ewen, Alana M.; Stack, Marna; DeCarvalho, Heloisa; Sandel, Megan; Mishuris, Rebecca G.; Deych, Stella; Pelletier, Patrick; Kressin, Nancy R.	2019	Our results showed that unemployment, food insecurity, and affording medications were the most commonly reported SDOH among BMC patients and that implementing a screening and referral process to address and document SDOH is feasible in our primary care practice. In addition, the results indicate that integrating a systematic clinical strategy using EHR workflows to address SDOH is feasible and ma…	One of the major challenges when implementing new clinical strategies in primary care is obtaining stakeholder buy-in.17–19 By aligning our work with the strategic mission of the hospital, which is to identify root causes of chronic instability and utilization among patients and match resources against them to break chronic cycles, we were able to obtain buy-in from hospital leadership to designa…	Yes	EHR; Electronic health record
6	Documentation and review of social determinants of health data in the EHR: measures and associated insights.	Wang, Michael; Pantell, Matthew S.; Gottlieb, Laura M.; Adler-Milstein, Julia	2021	Not discussed	Not discussed	Yes	EHR; Electronic health record
7	Effect of Community Health Workers on 30-Day Hospital Readmissions in an Accountable Care Organization Population: A Randomized Clinical Trial.	Carter, Jocelyn; Hassan, Susan; Walton, Anne; Yu, Liyang; Donelan, Karen; Thorndike, Anne N.	2021	Not discussed; In this randomized clinical trial at 1 academic medical center, a CHW intervention reduced 30-day hospital readmissions in adult general medicine inpatients by nearly 50%. However, subgroup analyses revealed that most of the effect occurred for participants initially discharged to short-term rehabilitation. Intervention participants also were less likely to miss clinic appointments…	This study has limitations. Despite use of validated self-reported measures of health care utilization in our 30-day postdischarge survey, we may not have identified all encounters occurring outside our hospital system. However, the fact that all participants were within the ACO network helped ensure that enrolled participants received most, if not all, of their care within designated ACO coverag…	Yes, EHR	HER
8	The impact of enhancing self-management support for diabetes in Community Health Centers through patient engagement and relationship building: a primary care pragmatic cluster-randomized trial.	Hessler, Danielle; Fisher, Lawrence; Dickinson, Miriam; Dickinson, Perry; Parra, José; Potter, Michael B.	2022	Not discussed	Several limitations are important to keep in mind. First, the study included a comparative effectiveness design and did not allow for comparison to usual care. This was unavoidable because assessing for these areas without offering assistance in a clinical care context raises ethnical concerns. Second, because assessment was limited to only two time points, some change was likely not documented a…	Yes	EHR; electronic surveys; SMS text messaging
9	Online Telehealth Delivery of Group Mental Health Treatment Is Safe, Feasible, and Increases Enrollment and Attendance in Post-9/11 U.S. Veterans.	Fortier, Catherine B.; Currao, Alyssa; Kenna, Alexandra; Kim, Sahra; Beck, Brigitta M.; Katz, Dylan; Hursh, Colleen; Fonda, Jennifer R.	2022	Not discussed	Not discussed	Yes	EHRs (Electronic Health Records) and telemedicine
10	Computerized Intervention in Primary Care for Women Veterans with Sexual Assault Histories and Psychosocial Health Risks: a Randomized Clinical Trial.	Creech, Suzannah K.; Pulverman, Carey S.; Kahler, Christopher W.; Orchowski, Lindsay M.; Shea, M. Tracie; Wernette, Golfo Tzilos; Zlotnick, Caron	2022	Not discussed	Not discussed	Yes	Mobile App; Digital Health Intervention
11	Bridge to Health/Puente a la Salud: a pilot randomized trial to address diabetes self-management and social needs among high-risk patients.	Fitzpatrick, Stephanie L.; Papajorgji-Taylor, Dea; Schneider, Jennifer L.; Lindberg, Nangel; Francisco, Melanie; Smith, Ning; Vaughn, Katie; Vrany, Elizabeth A.; Hill-Briggs, Felicia	2022	Not discussed	There were several limitations in this pilot trial. First, we were not able to detect statistically significant differences in proportion of participants with A1C < 8% at follow-up between the two study arms. However, the findings from this pilot are promising and warrant a larger, pragmatic clinical trial to test the comparative effectiveness of these two approaches. Second, we used A1C values t…	EHR used for recruitment and for capturing clinical outcomes and particiant demographics and insurance coverage	Electronic health records; other web-based platform for conducting the intervention
12	Impact of a Low-Intensity Resource Referral Intervention on Patients' Knowledge, Beliefs, and Use of Community Resources: Results from the CommunityRx Trial.	Tung, Elizabeth L.; Abramsohn, Emily M.; Boyd, Kelly; Makelarski, Jennifer A.; Beiser, David G.; Chou, Chiahung; Huang, Elbert S.; Ozik, Jonathan; Kaligotla, Chaitanya; Lindau, Stacy Tessler	2020	Not discussed	Limitations should be considered when interpreting the results of this study. We have previously described that some controls were likely exposed to the intervention in this real-world trial.7 Although we do not know the exact number of controls that may have been exposed to the intervention, this possibility would bias our study toward the null hypothesis. The items measuring knowledge and belie…	Yes	EHR; algorithm based health IT tool to provide referrals to community resources.
13	Patient navigation to address sociolegal barriers for patients with cancer: A comparative-effectiveness study.	Battaglia, Tracy A.; Gunn, Christine M.; Bak, Sharon M.; Flacks, JoHanna; Nelson, Kerrie P.; Wang, Na; Ko, Naomi Y.; Morton, Samantha J.	2022	Navigation enhanced by access to legal consultation and support had no impact on timely treatment, patient distress, or patient needs. Although most patients reported sociolegal barriers, few required intensive legal services that could not be addressed by navigators.	Project SUPPORT had several limitations worth considering. As mentioned above, we acknowledge the high rates of timely treatment among participants, which compromised our power to detect a difference in study groups. The lack of data on patient comorbidity and navigation dose or number of encounters limits our ability to explain our findings. In addition, this was a single-site study in 1 urban s…	Yes	Clinical data warehouse; EHRs; and a variety of Patient-Reported Outcomes (PROs) captured through patient surveys at baseline and follow-up; details below: The Clinical Data Warehouse is a comprehensive database that consolidates data from multiple hospital systems, allowing for the automatic capture of sociodemographic and clinical variables. Data elements for complex cancer treatment variables …
14	Nurse-led hospital-to-community care, clinical outcomes for people living with HIV and health-related social needs	Moen, Marik; Doede, Megan; Johantgen, Meg; Taber, Deborah; Adesanya, Ikmat; Werthman, Emily; Friedmann, Erika	2022	there is a lack of systemic reporting on HRSN variables in a standardized format (in query-able domains) in the EHR. Current EHR advancements for documenting HRSN may result in more complete data and readily extractable data for future investigations. HSRN data were only captured at baseline, precluding critical examination of mediated relationships between the programme and outcomes based on imp…	s. Specifically, medical records were not integrated between health systems, complicating communication and evaluation of care, especially viral loads and appointment attendance. In the future, a more complete longitudinal evaluation of all participant data (including outside medical records) and a comparison with a non-intervention or delayed-intervention (control) group may produce more complet…	Yes	Electronic Health Records
15	Improving Diabetes Care Through Population Health Innovations and Payments: Lessons from Western Maryland.	Wang, Gary X.; Gauthier, Richard; Gunter, Kathryn E.; Johnson, Lori; Zhu, Mengqi; Wan, Wen; Tanumihardjo, Jacob P.; Chin, Marshall H.	2023	Result: In total, 1696 of 2420 (70%) eligible patients were screened. Employment (12%), food insecurity (11%), and problems affording medications (11%) were the most prevalent concerns among respondents. In total, 367 of 445 (82%) patients with ≥1 identified needs (excluding education) had the appropriate ICD-10 codes added to their visit diagnoses. In total, 325 of 376 (86%) patients who request…	Successes reported: Conclusions: Implementing a systematic clinical strategy in primary care using EHR workflows was successful in identifying and providing resource information to patients with SDOH needs.	Yes	EHR; Electronic health record
16	Financing Diabetes Care in the U.S. Health System: Payment Innovations for Addressing the Medical and Social Determinants of Health.	Saulsberry, Loren; Peek, Monica	2019	The passage highlights that while some programs like Accountable Care Organizations (ACOs) have increased the percentage of well-controlled diabetes patients, there is limited evidence on how these improvements were achieved. This lack of evidence can make it challenging to identify best practices for addressing SDH. Other challenges like integration of medical and social services, managing of fu…	Not discussed	Highlights the importance of SDOH incorporating into EHR and other medical claims	not specified
17	Clinical and Sociobehavioral Prediction Model of 30-Day Hospital Readmissions Among People With HIV and Substance Use Disorder: Beyond Electronic Health Record Data.	Nijhawan, Ank E.; Metsch, Lisa R.; Zhang, Song; Feaster, Daniel J.; Gooden, Lauren; Jain, Mamta K.; Walker, Robrina; Huffaker, Shannon; Mugavero, Michael J.; Jacobs, Petra; Armstrong, Wendy S.; Daar, Eric S.; Sullivan, Meg; Del Rio, Carlos; Halm, Ethan A.	2019	Not discussed	The study population is primarily comprised of hospitalized HIV-positive substance users, which may limit the generalizability of the findings to a broader population.	Yes	EHR; algorithm based health IT tool to provide referrals to community resources.
18	Effects of a standardized community health worker intervention on hospitalization among disadvantaged patients with multiple chronic conditions: A pooled analysis of three clinical trials.	Vasan, Aditi; Morgan, John W.; Mitra, Nandita; Xu, Chang; Long, Judith A.; Asch, David A.; Kangovi, Shreya	2020	Food Insecurity: The study emphasizes the importance of addressing food insecurity as a social determinant of health, particularly in HIV-positive populations. Food insecurity is linked to decreased adherence to antiretroviral therapy (ART) and lower virologic suppression rates. However, access to safe and adequate nutrition is not routinely assessed during hospitalizations. The challenge here is…	This study has a number of limitations. Over 40 percent of eligible individuals declined participation, which may limit the external validity of our results. Hospitalization data were limited to acute care episodes within the state of Pennsylvania and did not include psychiatric admissions, emergency department visits, or hospitalizations outside of the state.	Yes	Pennsylvania State Secondary databases were used to capture outcomes data like hopsitalizations and length of stay; CHWs used their own systems to provide tailored support; the extent to which Electronic Helath Records was used is unclear
19	Screening for health-related social needs in the emergency department: Adaptability and fidelity during the COVID-19 pandemic.	Murray, Evangelia; Roosevelt, Genie E.; Vogel, Jody A.	2022	N/A	n/a	Yes	1.EHRs were used to capture and document SDOH data, and they facilitated the electronic communication of directed resources to patients who screened positive for HRSN. 2. Technology in the form of telephone calls was utilized to conduct HRSN screening remotely during the COVID-19 pandemic.
20	Food Insecurity in Older Adults in an Integrated Health Care System	Steiner JF, Stenmark SH, Sterrett AT, Paolino AR, Stiefel M, Gozansky WS, Zeng C.	2018	N/A	N/A	No	N/A
21	Development and Implementation of a Maryland State Program Providing Hospital Payment Incentives for Reduction in Readmission Disparities.	Rice, Kyle; Schuster, Alyson; Pack, Allan; Dougherty, Geoff B.	2023	N/a It focuses on the development and methodology of the program, and it does not delve into qualitative descriptions of challenges in addressing SDOH.	N/a	Yes	N/a mentions the use of Electronic Health Records (EHRs) in the program but does not provide detailed information about other types of technology used to address social determinants of health (SDOH).
22	Implementation fidelity to a behavioral diabetes prevention intervention in two New York City safety net primary care practices.	Gupta, Avni; Hu, Jiyuan; Huang, Shengnan; Diaz, Laura; Gore, Radhika; Levy, Natalie; Bergman, Michael; Tanner, Michael; Sherman, Scott E.; Islam, Nadia; Schwartz, Mark D.	2023	Not discussed	First, as a pragmatic trial, the CHORD implementation did not start or end on fixed days, because CHWs maintained continued contacts with their patients. As a result, some interventions, such as referrals, were delivered outside of the intervention period. We included them in this analysis if they were recorded by CHWs. Second, fidelity measures can be intervention specific. Therefore, the measur…	Yes	EHR; REDCap system forms completed by CHWs including Outreach Form; Intake Form; Goalsetting Form; Encounter Form; Study Form
23	Implementing CenteringPregnancy Group Prenatal Care for Minority Women Living with HIV at an Urban University Hospital.	Potter, JoNell E.; Duthely, Lunthita M.; Diaz-Mendez, Nelly; Smith, Lindsay; Messick, Barbara J.; Echenique, Maria; Galli, Johnny; Yasin, Salih; Villar-Loubet, Olga	2019	Not discussed	N/A	Yes	EHR,HIV immune markers, and pregnancy and birth outcomes
24	Management of Isolated Skull Fractures in Pediatric Patients: A Systematic Review.	Donaldson, Katelyn; Li, Xun; Sartorelli, Kennith H.; Weimersheimer, Peter; Durham, Susan R.	2019	N/A	N/a	Yes	EHR
25	Health Center-Based Community-Supported Agriculture: An RCT.	Berkowitz, Seth A.; O'Neill, Jessica; Sayer, Edward; Shahid, Naysha N.; Petrie, Maegan; Schouboe, Sophie; Saraceno, Megan; Bellin, Rochelle	2019	Not discussed	The findings of this study should be interpreted in light of its limitations. This was a single-site study with a predominately non-Hispanic white and female sample, so how the findings generalize to other settings is not known. Additionally, although study group assignment was masked for outcome assessors, this was not possible for the study participants themselves.	Yes; although recruitment was informed by electronic health records; this community based intrevention conducted by a community health center used and independent data collection system for the study	Independent (unspecified) system to collect primary data for the research
26	Effects of In-Person Assistance vs Personalized Written Resources About Social Services on Household Social Risks and Child and Caregiver Health: A Randomized Clinical Trial.	Gottlieb, Laura M.; Adler, Nancy E.; Wing, Holly; Velazquez, Denisse; Keeton, Victoria; Romero, Abigail; Hernandez, Maricarmen; Munoz Vera, Andrea; Urrutia Caceres, Elizabeth; Arevalo, Catherine; Herrera, Philip; Bernal Suarez, Mara; Hessler, Danielle	2020	Not discussed	There are multiple limitations of this study. First, the study was conducted in only 1 urgent care setting, and it is unclear whether our findings are generalizable to other locations and clinical settings. Second, 27.8% of study participants were lost to follow-up at 6 months. Notably, this represents less attrition than in comparable studies undertaken in low-resource settings.22,25,64,65 Moreo…	EHR use is not documented; study data captured through REDCAP	REDCAP used for study data capture
27	Feasibility of a family-centered intervention for depressed older men in primary care.	Hinton, Ladson; La Frano, Erika; Harvey, Danielle; Alfaro, Eduardo Delgadillo; Kravitz, Richard; Smith, Andrew; Apesoa-Varano, Ester Carolina; Jafri, Asma; Unutzer, Jurgen	2019	Not discussed	There are several important limitations to this pilot study. First, this is a small pilot study conducted in an FQHC serving a safety‐ net population with a high proportion of Latinos and caution should be used in generalizing to other populations.	No	N/A Research data technology is not discussed; EHR use is not documented.
28	Intensive care management for high-risk veterans in a patient-centered medical home - do some veterans benefit more than others?	Swankoski, Kaylyn E.; Reddy, Ashok; Grembowski, David; Chang, Evelyn T.; Wong, Edwin S.	2023	Not discussed	This study has several limitations. First, the PIM demonstration was limited to 5 VA primary care sites that were selected through a competitive process.22 These sites were selected, in part, on the types of services they would provide participating patients and might have more resources and experience providing advanced services than other primary care sites. Second, we set out to identify subgr…	No	Claims data was used to capture SDOH; specific technology use is not documented; use of EHR is not documented
29	Pragmatic Clinical Trial to Improve Patient Experience Among Adults During Transitions from Hospital to Home: the PArTNER study.	LaBedz, Stephanie L.; Prieto-Centurion, Valentin; Mutso, Amelia; Basu, Sanjib; Bracken, Nina E.; Calhoun, Elizabeth A.; DiDomenico, Robert J.; Joo, Min; Pickard, A. Simon; Pittendrigh, Barry; Williams, Mark V.; Illendula, Sai; Krishnan, Jerry A.	2022	Not discussed	Our study has several limitations. Our study took place at a single MSH which could limit external validity. Another potential limitation is the missing data for our co-primary outcomes in approximately 20% of participants. Participants with missing data were about 3 years younger compared with those without missing data but did not differ in other baseline characteristics.	Yes	Electronic health records used to capture PROMIS measures of anxiety and information support and healthcare utilization measures of ED visits and readmissions
30	Medical-Legal Partnership Effects on Mental Health, Health Care Use, and Quality of Life in Primary Care: A Randomized Clinical Trial.	Liaw, Winston; Northrup, Thomas F.; Stotts, Angela L.; Bakos-Block, Christine; Suchting, Robert; Chen, Alvin; Hernandez, Abigail; Finzetto, Lisandra; Green, Charles; Murphy, Thomas	2023	Not discussed	Several limitations should be considered. First, our study randomized referrals rather than the receipt of services. We chose this design to isolate the effect of actions taken by clinics. Future studies should consider randomizing participants after legal services organizations accept them.	Yes	EHR and REDCap
31	Predictive Model-Driven Hotspotting to Decrease Emergency Department Visits: a Randomized Controlled Trial.	Post, Brady; Lapedis, Jeremy; Singh, Karandeep; Valenstein, Paul; Büyüktür, Ayşe G.; Teske, Karin; Ryan, Andrew M.	2021	Not discussed	There was often a delay between the date of randomization and the first visit with a case management agency, meaning that, during the first several weeks of a patient’s treatment period, no services would have been received, effectively diluting the treatment. However, due to the nature of outreach to complex patients, we expect that such delays would be present in most implementations of similar…	Yes, EHR	EHR used to develop predictive model for ED visits and to contact high risk population to assess social needs; After making contact, case workers made an appointment with patients to conduct an inventory of the patient’s social and medical needs. The case worker then contacted appropriate community resources, such as food banks, housing support services, and integrated clinical teams, to assist p…
32	A care coordinator screening strategy to address health harming legal needs	Berg, Daniel; Setrini, Alice; Chan, Kathy; Cibulskis, Ann; Ameji, Kulsum; Hinami, Keiki	2022	Not discussed	Not discussed	No	n/A Research data technology is not discussed; EHR use is not documented.
33	Evidence that collaborative action between local health departments and nonprofit hospitals helps foster healthy behaviors in communities: a multilevel study	Geri Rosen Cramer; Young, Gary J; Singh, Simone; McGuire, Jean; Kim, Daniel	2021	Not discussed	N/A	Yes	2015 BRFSS Smart Survey
34	Hospital Partnerships for Population Health: A Systematic Review of the Literature	Hilts Katy Ellis; Yeager, Valerie A; Joseph, Gibson P; Halverson, Paul K; Blackburn, Justin; Menachemi Nir	2021	study was unable to list all partenerships	possibility of missed studies	No	N/A
35	Medicaid Investments To Address Social Needs In Oregon And California	Alderwick, Hugh; Hood-Ronick, Carlyn M; Gottlieb, Laura M	2019	Not discussed	N/A	Yes	interview conducted using electronic media
36	Enabling Services Improve Access To Care, Preventive Services, And Satisfaction Among Health Center Patients	Yue, Dahai; Pourat, Nadereh; Chen, Xiao; Lu, Connie; Zhou, Weihao; Daniel, Marlon; Hoang, Hank; Sripipatana, Alek; Ponce, Ninez A	2019	Not discussed	might not have completely overcome this problem because of unobserved confounding factors. total 6 limitations	Yes	Administrative data source maintained by HRSA and survey
37	A Social-Return-On-Investment Analysis Of Bon Secours Hospital's 'Housing For Health' Affordable Housing Program	Drabo, Emmanuel Fulgence; Eckel, Grace; Ross, Samuel L; Brozic, Michael; Carlton, Chanie G; Warren, Tatiana Y; Kleb, George; Laird, Aurelia; Porter, Keshia M Pollack; Pollack, Craig Evan	2021	Limited ability to measure a comprehensive set of potential consequences of housing rehabilitation, imprecision in estimating outcomes due to lack of detailed intake information, and difficulty in incorporating equity considerations into SROI analysis	Imprecise estimates of financial proxies in the study methodology. It highlights the potential inaccuracies in applying estimates from other studies to a different population and context, as well as the limitations of using financial proxies and the lack of detailed participant information.	Yes
38	Embedding Social Workers In Veterans Health Administration Primary Care Teams Reduces Emergency Department Visits	Cornell, Portia Y; Halladay, Christopher W; Ader, Joseph; Halaszynski, Jaime; Hogue, Melinda; McClain, Cristian E; Silva, Jennifer W; Taylor, Laura D; Rudolph, James L	2020	N/A	While the program’s expan- sion and the resulting variation in the timing of new social workers’ hiring allowed for a strong quasi-experimental study design, the interven- tion was not randomly assigned. While we are unaware of any major initiatives that would have affected veterans’ use of acute and urgent care that coincided with the intervention, it is none- theless possible that the hiring of…	Yes	EHR
39	Project Nurture Integrates Care And Services To Improve Outcomes For Opioid-Dependent Mothers And Their Children	McConnell, K John; Kaufman, Menolly R; Grunditz, Jenny I; Bellanca, Helen; Risser, Amanda; Rodriguez, Maria I; Renfro, Stephanie	2020	• Lack of coordination between the health care and human services sectors can hinder efforts to address social problems effectively. • Reluctance of individuals to seek necessary care or support due to fears of negative consequences, such as being reported to child welfare officials, can impede progress in addressing social problems. • Variation in state laws and regulations regarding social issu…	• The study faced challenges in identifying a treatment group due to the practice of not requiring women to sign a consent form, making it difficult to create a registry of identified patients for research purposes. Instead, giving birth within Multnomah County was used as a proxy for exposure to the Project Nurture model . • Inclusion of women in the "treatment" group who were not exposed to Pro…	N/A	N/A Research data technology is not discussed; EHR use is not documented.
40	Addressing the Poverty Barrier in Collaborative Care for Adults Experiencing Homelessness: A Case-Based Report	Cabán-Alemán Carissa; Iobst Saraswati; Luna, Aniuska M; Foster, Adriana	2020	Although individualized approaches are helpful, it is fundamental to consider the needs of the target population (e.g. patients who experience homelessness) as a whole and to design effective interventions that aim to meet the triple aim of integrated care considering the social, economic and political variants that influence the pathology and efficacy of treatment for this group of individuals. …	A limitation in how the program was implemented is that the procedures were created by the medical director of behavioral health, a psychiatrist who was hired to implement integrated care as per the HRSA grant after it was obtained. Although the leadership of the primary care department was involved in the process of implementing the program and the medical director was consulted in order to crea…	N/A	N/A
41	Interprofessional, multitiered daily rounding management in a high-acuity hospital	Eamranond, Pracha Peter; Bhukhen, Arti; DiPalma, Donna; Schawan Kunuakaphun; Burke, Thomas; Rodis, John; Grey, Michael	2020	The hospital also manages a complex group of patients with limited health insurance and a disproportionate share of social inequity, compared to other parts of the region. This patient population may not be representative of other parts of the USA.	Given the scope of this pre-/ post-case study, potential confounding factor data were not collected and a multivariate analysis was not performed to account for these factors. Aside from multitiered LDM, selected units piloted a novel unit-based triad leadership model Daily rounding management whereby nurse and case managers and unit-specific physician leaders were incented to achieve quality and…	No	N/A
42	Indianapolis Provider's Use Of Wraparound Services Associated With Reduced Hospitalizations And Emergency Department Visits	Vest, Joshua R; Harris, Lisa E; Haut, Dawn P; Halverson, Paul K; Menachemi, Nir	2018	Potential cost savings were limited to hospital admissions. They focused solely on admissions because estimates of ED costs were not available.They do not present a complete return on investment because they were unable to adequately reflect the cost of offering wraparound services or to enumerate all of the potential sources of savings attributed to the services.	First, our findings refer to a single institution’s safety-net population and might not be generalizable to other populations. Second, our analysis was limited to patients whose receipt of wraparound services was documented. For example, some patients in the panel may have received consultations from a medicallegal partnership, but because of insufficient documentation, we could not include that …	Yes	The primary data source was Eskenazi Health’s electronic health record (EHR) system. The EHR provided diagnoses, encounter history, and textual data from the computerized order entry system. These data were supplemented with multiple registry and billing systems associated with the different service areas within Eskenazi Health.
43	Reasons for Social Work Referrals in an Urban Safety-Net Population: A Natural Language Processing and Market Basket Analysis Approach.	Bako, Abdulaziz T.; Walter-McCabe, Heather; Kasthurirathne, Suranga N.; Halverson, Paul K.; Vest, Joshua R.	2021	Physicians value the importance of addressing social needs; however, they are likely not the best professionals to address these needs, due to their training, skillset, workflow, and insufficient community referral mechanisms available to them to get patients to needed services. Moreover, medical professionals lack attention toward multiple co-occurring social needs.	Categories for referral reasons are not exhaustive of every reason a patient is referred to a social worker; Relied on NLP to classify referral notes, which could result in misclassification; Purposefully limited the analysis to two-category co- occurrence rules only; not able to establish causal relationships between social needs; Potential selection bias: Referrals may reflect resource availabi…	Yes	EHR, Indiana Network for Patient Care (INPC) - a local health information excahange system database, R statistical analysis software to conduct Market Basket Analysis
44	The Impact of Food Insecurity Screenings and Community Food Resource Referrals for Patients with Type 2 Diabetes.	Ofili, Miriam Ngozi; Lawson, Robin M.	2020	Food Insecurity (FI) is not addressed on a routine basis in clinical settings. Even when clinics do screen for FI, not much data is available on how effective community food referrals are for the patients who are referred. Barriers to use food resources include lack of information on enrollment process, inaccessibility (e.g., location, long wait time, and hours of operation), competing priorities…	The study included a small sample of Type 2 Diabetes patients who visited the clinic within a 4-week period; longer recruitment might have yielded a larger sample. It also followed participants for only 12 weeks, which could have impacted the findings. Food insecurity was determined using a single question in the PRAPARE tool, potentially missing some cases. Additionally, the study's single-site …	Yes	Electronic Protocol for Responding to and Assessing Patients’ Assets, Risks, and Experience (PREPARE) tool implemented through EHR templates, Community Referral Network (CRN): a web-based software platform used for referrals, and Electronic Health Records. The Statistical Package for the Social Sciences (SPSS) version 25 was used for analysis.
45	The implementation cost of a safety‐net hospital program addressing social needs in Atlanta.	MacLeod, Kara E.; Chapel, John M.; McCurdy, Matthew; Minaya‐Junca, Jasmin; Wirth, Diane; Onwuanyi, Anekwe; Lane, Rashon I.	2021	Non-Hispanic Black populations in the United States experience an earlier onset of CVD, and this has implications for prevention and health care. In addition, health care system use differs by race, ethnicity, and income, and this can lead to lower quality care for low income and minority populations.	Some program costs were estimates and sampling uncertainty was not accounted for in this analysis. the find- ings presented in this paper are for a single program serving heart failure patients in a safety-net hospital in Atlanta - may not be generalizable to other populations. The study did not compare the costs relative to outcomes.	Yes	Epic Healthy Planet (for tracking patient social needs)
46	Development of a homelessness risk screening tool for emergency department patients.	Doran, Kelly M.; Johns, Eileen; Zuiderveen, Sara; Shinn, Marybeth; Dinan, Kinsey; Schretzman, Maryanne; Gelberg, Lillian; Culhane, Dennis; Shelley, Donna; Mijanovich, Tod	2022	Screening for risk of future homelessness is more complex than recognizing current homelessness. While effective homelessness pre- vention interventions exist, one challenge is accurately targeting peo- ple who are most likely to become homeless and benefit from intervention. It is unknown whether predictors of homelessness would differ for ED patients or even if a sufficiently accurate and conci…	The study was limited to a single ED: results may be different for pediatric EDs or other settings, highlighting the importance of considering context when developing screening tools. Approximately half of ED patients approached for study participation were excluded due to ineligibility, which may have affected precision of the analyses. Another limitation is that the study did not include unshel…	Yes	REDCap electronic data capture tools for survey, New York City Department of Homeless Services CARES database to determine shelter entry after the baseline ED visit, and SAS Link King to conduct probabilistic and deterministic matching with CARES.
47	An embedded multiple case study: using CFIR to map clinical food security screening constructs for the development of primary care practice guidelines.	Taher, Sabira; Muramatsu, Naoko; Odoms-Young, Angela; Peacock, Nadine; Michael, C. Fagen; Courtney, K. Suh	2022	Electronic screening tools were either una- vailable or were only available intermittently (e.g. once per year), which did not allow for clinicians to capture the episodic and cyclical nature of FI; Limited financial resources, spending restrictions that required patients to be enrolled in SNAP benefits; Limited staff capacity; Lack of patient privacy during screening - patients displayed discomf…	Research process could have been influenced by researcher's personal biases and experiences; Small sample size; Study did not include patients’ perspectives or in vivo observations of screening and referral processes; Data were collected at only one point in time and relied on the memory of each participant; This study is applicable only to the context of the U.S. healthcare system and characteri…	Yes	Electronic Medical Record, Telephone
48	Conceptualizing the effective mechanisms of a social needs case management program shown to reduce hospital use: a qualitative study.	Fleming, Mark D.; Safaeinili, Nadia; Knox, Margae; Hernandez, Elizabeth; Esteban, Emily E.; Sarkar, Urmimala; Brewster, Amanda L.	2022	Although health care systems are increasingly exploring interventions to assist patients with social needs, a lack of evidence about the mechanisms by which these complex interventions benefit patients challenges translation across settings and populations. Complex interventions have multiple independent and interdependent components, which can make it difficult to specify the active ingredient a…	First, the data are derived from a single program, targeting a population with Medicaid insurance and moderately high risk of acute care utilization, so it is possible that some of the mechanisms identified here would be less salient in other settings. Second, the study was conducted in collaboration with the implementing health system in which case managers worked, which might have shaped what c…	Yes	Electronic Health Records, Nvivo12 for analysis of transcripts and field notes
49	Social Needs Screening and Referral Program at a Large US Public Hospital System, 2017.	Berry, Carolyn; Paul, Margaret; Massar, Rachel; Marcello, Roopa Kalyanaraman; Krauskopf, Marian	2020	Integration of screen into workflow; Burden on staff; Patient's low literacy, limited English proficiency, concerns about immigration status leading to non-completion of screening tool; challenges in tracking referrals	Further research and evaluation are needed to assess the impact of SDOH screening on staff and especially patients.	Yes	Electronic Health Records, NowPow (referral software system)
50	A Nurse-Led Intervention to Address Food Insecurity in Chicago.	Grenier, Jennifer; Wynn, Nicole	2018	There is a paucity of data to describe the magnitude of food insecurity. While there are programs that take the food waste from organizations and donate it to local shelters or food pantries for distribution, this seems hardly enough to address the continued growing concern of food insecurity. It may be challenging for people to acknowledge that they are food insecure.	Not discussed	N/A	N/A
51	Training Student Volunteers as "Community Resource Navigators" to Integrate Health and Social Care in Primary Care.	Gautam, Diwas; Kutzer, Kate; Sandhu, Sahil; Dennis, Erika; Xu, Jacqueline; Blanchard, Lilian; Munoz, Veronica; Drake, Connor; Crowder, Carolyn; Eisenson, Howard; Bettger, Janet	2022	Despite growing evidence on the feasibility and effectiveness of volunteer models that engage students to address social needs in the clinical setting, most studies do not provide full details of the content and delivery of the training program needed for replication. Trainees consistently described two areas for improvement: more time learning about community resources and practicing challenging…	While this paper focuses of disseminating curricular components the structured training program, there are remaining research opportunities to evaluate the implementation and effectiveness of the training approach.	Yes	Telephone
52	An In-Clinic Food Pharmacy Addresses Very Low Food Security.	Cooper, Emily; Mohanan, Sveta; Garcia, Christina; Thomas, Tamara Baldwin; Ozgun, Holly; Hernandez, Brisa; Cheng, Iris; Cole, Alisahah J.	2020	The food pharmacy was helpful for patients currently experiencing very low food security; however, several patients described the cyclical and sometimes predictable nature of food insecurity. Patients also expressed difficulty acquiring fresh fruits and vegetables, which suggests a need for increased access to fresh foods.	Not discussed	Yes	Electronic Medical Record
53	Evidence based processes to prevent readmissions: more is better, a ten-site observational study.	Pugh, Jacqueline; Penney, Lauren S.; Noël, Polly H.; Neller, Sean; Mader, Michael; Finley, Erin P.; Lanham, Holly J.; Leykum, Luci	2021	Not discussed	Our results suggest that consistently providing a greater number of the recommended evidence-based transitional care processes may reduce readmissions. These results confirm previous similar observations by Leppin [14], Burke [18], and Bradley [19]. While some processes have been adopted widely and targeted at all patients being discharged, others processes have not. Eight of the 20 processes we …	Not discussed or relevant to type of study	Not discussed or relevant to type of study
54	Unmet Social Needs and No-Show Visits in Primary Care in a US Northeastern Urban Health System, 2018–2019.	Fiori, Kevin P.; Heller, Caroline G.; Rehm, Colin D.; Parsons, Amanda; Flattau, Anna; Braganza, Sandra; Lue, Kelly; Lauria, Molly; Racine, Andrew	2020	Not discussed. Our findings appear plausible as one could imagine how a lack of key resources may influence health-seeking behaviors. For example, our findings support that lack of access to transportation will make it harder to attend routine primary care visits.	Despite the findings and possible implications of this study, there are important limitations, including significant issues related to establishing causation and temporality. First, we cannot attribute this difference in no-show appointments to a single factor, as we know patient behavior is multifactorial. We also assume that the social needs assessment taken at 1 time point is stable enough of …	Yes	EHR (screening results stored)
55	Cooling The Hot Spots Where Child Hospitalization Rates Are High: A Neighborhood Approach To Population Health	Beck, Andrew F; Anderson, Kristy L; Rich, Kate; Taylor, Stuart C; Iyer, Srikant B; Kotagal, Uma R; Kahn, Robert S	2019	This neighborhood focus has been strengthened by accessible electronic health record data. Countywide and neighborhood-specific analyses are now made possible by knowing (and geocoding) patient addresses. Other regions with single dominant health care systems, or with data pooled across systems, can similarly characterize the distribution of key outcomes. We see power in this use of electronic he…	Throughout this quality improvement project, we grappled with the reality that local payment models do not fully incentivize value over service. Thus, efforts were largely mission driven and funded through repurposed resource deployment, philanthropy, and grants. Reach and impact, and perhaps areas of focus, might have looked different had the medical center been operating in a pay-for-value mode…	Yes	EHR and community databases
56	Quantifying Health Systems' Investment In Social Determinants Of Health, By Sector, 2017–19	Horwitz, Leora I; Chang, Carol; Arcilla, Harmony N; Knickman, James R	2020	Overall, we found that the increasing public interest in social determinants of health has been accompanied by health system investments in social determinants of at least $2.5 billion in the past two years, largely in housing. However, these investments still represent a small fraction of overall spending by health systems, which at present are much more likely to be developing screening and ref…	N/A	No	N/A
57	Prescribing Housing: A Scoping Review of Health System Efforts to Address Housing as a Social Determinant of Health.	Koeman, Jamison; Mehdipanah, Roshanak	2021	N/A	N/A	No	N/A
58	The Baltimore Community-Based Organizations Neighborhood Network: Enhancing Capacity Together (CONNECT) Cluster RCT.	Wu, Albert W.; Weston, Christine M.; Ibe, Chidinma A.; Ruberman, Claire F.; Bone, Lee; Boonyasai, Romsai T.; Hwang, Sandra; Gentry, Janice; Purnell, Leon; Lu, Yanyan; Liang, Shuwen; Rosenblum, Michael	2019	N/A	N/A	No	N/A
59	Effect of Community Health Worker Support on Clinical Outcomes of Low-Income Patients Across Primary Care Facilities: A Randomized Clinical Trial.	Kangovi, Shreya; Mitra, Nandita; Norton, Lindsey; Harte, Rory; Zhao, Xinyi; Carter, Tamala; Grande, David; Long, Judith A.	2018	This current study adds to the body of evidence supporting the role of CHWs as trusted mediators between disadvantaged patients and formal health care organizations.38-40 Although primary care practices employ other personnel (eg, social workers, nurses, and physicians) who play critical roles in the clinical team, they are unlikely to share a background with disadvantaged patients. Empirical tes…	A standardized intervention did not improve self-rated health but did improve the patient-perceived quality of care while reducing hospitalizations, suggesting that health systems may use a standardized intervention to address the social determinants of health.	Yes, EHR	CHWs could access EHR; but no other information about EHR is documented; many other quality measures like self rating are captured through standardized instruments admininistered by CHWs
60	Food for Thought: A Randomized Trial of Food Insecurity Screening in the Emergency Department.	Cullen, Danielle; Woodford, Ashley; Fein, Joel	2019	Limitations of the study include the inability to verify the self-reported data, including actual FI, as well as self-report of race/ethnicity. Although we interpret the higher rates of self-reported FI in the tablet-based format as suggestive of more honest responses, we cannot verify this statement. Future studies might consider a crossover design, with caretakers answering in both formats, how…	Although both verbal interview and tablet-based screening modalities were effective in identifying food insecurity, tablet-based screening had a higher disclosure rate and was the participants' preferred screening method. There is a high level of comfort with screening regardless of clinical setting; it is possible that an added level of anonymity in the emergency department enhanced participants…	Yes, electronic tablets; REDCAP	All study procedures were conducted on a designated study tablet (iPad), with information recorded directly into REDCap.
61	Effect of a Peer-Led Behavioral Intervention for Emergency Department Patients at High Risk of Fatal Opioid Overdose: A Randomized Clinical Trial.	Beaudoin, Francesca L.; Jacka, Brendan P.; Li, Yu; Samuels, Elizabeth A.; Hallowell, Benjamin D.; Peachey, Alyssa M.; Newman, Roxxanne A.; Daly, Mackenzie M.; Langdon, Kirsten J.; Marshall, Brandon D. L.	2022	N/A	n/a	No	n/a
62	Patient plus partner trial: A randomized controlled trial of 2 interventions to improve outcomes after an initial implantable cardioverter-defibrillator.	Dougherty, Cynthia M.; Thompson, Elaine A.; Kudenchuk, Peter J.	2019	No Blinding: The trial was not blinded, introducing potential bias. No True Patient Control Group: Lack of a patient control group limits the ability to attribute effects specifically to the intervention. Reliance on Self-Report: Some outcomes relied on self-report, potentially introducing bias. Exclusion Criteria and Limited Generalizability: Excluding certain individuals may limit the generaliz…	No documented		telephone
63	Illustrating the value of social work: results of an open pilot trial of the psychosocial acuity scale in a large urban pediatric hospital.	Sable, Paige; Ross, Abigail; Clock, Annie; Corder, Brooke; Lamontagne, Nicole; McCaig, Jessica; Shanske, Susan; Tvedte, Matthew; Cummings, Jennifer; Chamorro, Pamela	2021	While Electronic Medical Records (EMRs) are an important mechanism used to document patient information and service provision, most interfaces prioritize collection of information required for medical billing purposes, rather than complexities of behavioral and social service needs. An emphasis on encounter data renders it challenging for social workers (SWs) to communicate statistically compelli…	Not documented	Yes	Electronic Health Record
64	Using Publicly Available Data to Understand the Opioid Overdose Epidemic: Geospatial Distribution of Discarded Needles in Boston, Massachusetts	Bearnot, Benjamin, MD; Pearson, John F, MD; Rodriguez, Jorge A, MD	2018	The strengths of this study include the publicly available and crowdsourced nature of the data and the high resolution of the reported locations of discarded needles. Notable limitations are that this sample included only needles reported to the Boston 311 service and may not be representative of all discarded needles or syringes. Two thirds of needle pickup reports were from the Bos:311 smartpho…	Not documented	Yes	Analysis of publicly available crowdsourcing data
65	Predictors for Poor Linkage to Care Among Hospitalized Persons Living with HIV and Co-Occurring Substance Use Disorder.	Summers, Nathan A.; Colasanti, Jonathan A.; Feaster, Daniel J.; Armstrong, Wendy S.; Rodriguez, Allan; Jain, Mamta K.; Jacobs, Petra; Metsch, Lisa R.; Del Rio, Carlos	2020	This work had a number of limitations. First, patient characteristics used in our work were collected at the time of enrollment primarily by self-report. Although the analysis in this work made the assumption that these factors were static throughout the duration of the study, it is possible that some may have changed over time. In addition, as a secondary analysis, the original study was not pow…	Not documented	Yes	Some EMR use for abstraction; Research database
66	Enhanced care planning and clinical-community linkages versus usual care to address basic needs of patients with multiple chronic conditions: a clinician-level randomized controlled trial.	Krist, Alex H.; O'Loughlin, Kristen; Woolf, Steven H.; Sabo, Roy T.; Hinesley, Jennifer; Kuzel, Anton J.; Rybarczyk, Bruce D.; Kashiri, Paulette Lail; Brooks, E. Marshall; Glasgow, Russel E.; Huebschmann, Amy G.; Liaw, Winston R.	2020	This study has several limitations. First, by including only patients who return the baseline survey, our design introduces a respondent bias. Respondents may have different needs, but we need baseline responses to assess uncontrolled MCC for study inclusion. Second, doing a clinician-level rather than practice-level randomization runs a risk for contamination between intervention and control gro…	No documented	Yes	Some EMR use for abstraction; Research database
67	Social Risks Among Primary Care Patients in a Large Urban Health System.	Heller, Caroline G.; Parsons, Amanda S.; Chambers, Earle C.; Fiori, Kevin P.; Rehm, Colin D.	2020	N/A. (Since it was a prevalence study on social risks, it had methodological challenges.)	1. Screener is not uniformly administered, and clinics selected their target cohorts. To the extent these subpopulations have different burdens, the overall findings may not mirror true population-level distributions. 2. findings may not be representative of community residents who do not seek/receive their care elsewhere. 3. self-reported social risks may understate true prevalence because patie…	Yes, EHR	Respondent data were extracted from the electronic health record using Looking Glass Clinical Analytics, an application supporting the extraction of clinical data.
68	Relationship of Neighborhood Deprivation and Outcomes of a Comprehensive ST-Segment-Elevation Myocardial Infarction Protocol.	Huded, Chetan P.; Dalton, Jarrod E.; Kumar, Anirudh; Krieger, Nikolas I.; Kassis, Nicholas; Phelan, Michael; Kravitz, Kathleen; Reed, Grant W.; Krishnaswamy, Amar; Kapadia, Samir R.; Khot, Umesh	2021	N/A (The study aimed to evaluate whether the comprehensive STEMI protocol improved process and outcome metrics in patients with moderate or high socioeconomic deprivation)	1. The study was conducted at a single center within a regional STEMI system, and the findings need validation in separate populations to confirm their generalizability . The effect of the comprehensive STEMI protocol was evaluated using a historical control, which may introduce confounding due to temporal changes unrelated to the study interventions . The study made multiple comparisons of highe…	No	N/A
69	Enhancing Reach Out and Read With a Video and Text Messages: A Randomized Trial in a Low-Income Predominantly Latino Sample.	Jimenez, Manuel E.; Crabtree, Benjamin F.; Hudson, Shawna V.; Mendelsohn, Alan L.; Lima, Daniel; Shelton, Patricia A.; Veras, Julissa; Lin, Yong; Pellerano, Maria; Morrow, Lesley; Strom, Brian L.	2021	Parents declining participation in the intervention because of lack of interest in the research study and insufficient time to participate in it, participants lost to follw-up	The study occurred in one FQHC with families from largely low-income Latino backgrounds so our findings may not generalize to all settings. Future studies with larger sample sizes are needed. The study used parent-report measures, which introduce the possibility of social desirability and recall bias. Only assessed home literacy activities among the primary caregiver and it is possible that other…	Yes	Cellphones
70	Social Needs Screening in Hospitalized Pediatric Patients: A Randomized Controlled Trial.	Lopez, Michelle A.; Yu, Xian; Hetrick, Rebecca; Raman, Shivani; Lee, Jessica; Hall, Julie; Tran, Katherine; Vonasek, Bryan; Garg, Arvin; Raphael, Jean; Bocchini, Claire	2023	Caregivers of children declining participation, participants lost to follow-up	generalizability limitations and was restricted in scope because it was focused on English-speaking mothers, focused only on admissions on day 3 or later. Also limited by the recruitment of a convenience sample and the inability to blind participants, given the nature of the study	No	N/A

## Sheet: Review Question Q7
Review Question 7: Descriptive Characteristics of Hospital Initiatives to address SDOH
Record #	Article Name	Author	Year	Type of Hospital Organization, e.g. Academic Health Center, Veteran's Affairs, Safety Net Hospital, etc. (Initially this could be qualitatively filled before we develop coding categories)	Geographic Region of US, e.g., Northeast, Southeast, etc. (Initially this could be qualitatively filled before we develop coding categories)	Targeted Population, e.g., seniors, children, women, VA, military, etc. (Initially this could be qualitatively filled before we develop coding categories)	Diseases or Conditions or Behaviors Addressed (Initially this could be qualitatively filled before we develop coding categories)	Services Provided (Initially this could be qualitatively filled before we develop coding categories)
1	Missed psychosocial risk factors during routine preoperative evaluations are associated with increased complications after elective cancer surgery.	Meyers, Patrick M.; Leeds, Ira L.; Enumah, Zachary O.; Burkhart, Richard A.; He, Jin; Haut, Elliott R.; Efron, Jonathan E.; Johnston, Fabian M.	2019	academic Medical Center	Northeast	patients with known or suspected gastrointestinal malignancies seeking curative surgical resection between March 1, 2017, and February 28, 2018, presenting to the center’s gastrointestinal surgical oncology clinics were included in this study as a convenience sample.	Diabetes COPD Heart failure Liver disease Disseminated cancer Chronic steroid use Weight loss Bleeding disorder Preoperative sepsis	administering a structured survey to assess psychosocial risk factors. reviewing patient medical records to document psychosocial risk factors. conducting research and dta analysis to assess the impact of documentation on postoperative outcomes.suggesting medical services for cancer care and surgery were provided to patients.
2	Outpatient Palliative Care for Noncancer Illnesses: One Program's Experience with Implementation, Impact, and Lessons Learned.	Bischoff, Kara E.; Lin, Joseph; Cohen, Eve; O'Riordan, David L.; Meister, Sarah; Zapata, Carly; Sicotte, Jeffrey; Lindenfeld, Paul; Calton, Brook; Pantilat, Steven Z.	2022	Medical Center	Western	People with serious illness, requiring palliative care	Neurologic Pulmonary Cardiovascular Gastrointestinal Multimorbidity Renal Infectious/immunologic	Outpatient palliative care services in clinic or via telemedicine
3	Financial Incentives for Smoking Cessation in Hospitalized Patients: A Randomized Clinical Trial.	Ladapo, Joseph A.; Tseng, Chi-Hong; Sherman, Scott E.	2020	Medical Center; Veteran's Affairs Health System	Northeast	Active smokers among low-income hospitalized patients	Smoking	Ecidence-based smoking cessation therapy participation; Participants randomized to the financial incentives group were also eligible to receive up to $550 for participation in Quitline counseling ($50), participation in a community-based cessation program ($50), use of pharmacotherapy ($50), and biochemically-confirmed smoking cessation at 2 months ($150) and 6 months ($250).
4	Real-World Disparities in Remote Follow-Up of Cardiac Implantable Electronic Devices and Impact of the COVID-19 Pandemic: A Single-Center Experience.	Lehmann, H. Immo; Sharma, Krishan; Bhatia, Roma; Mills, Theresa; Lang, Joshua; Li, Guoping; Andrews, Carl; Cullivan, Jay; Singh, Jagmeet; Mela, Theofanie	2023	Medical Center	Northeast	Senior with implanted cardiac devices	Cardiac conditions; people on pacemakers and other implanted devices	Remote monitoring services
5	Implementing an EHR-based Screening and Referral System to Address Social Determinants of Health in Primary Care.	Buitron de la Vega, Pablo; Losi, Stephanie; Sprague Martinez, Linda; Bovell-Ammon, Allison; Garg, Arvin; James, Thea; Ewen, Alana M.; Stack, Marna; DeCarvalho, Heloisa; Sandel, Megan; Mishuris, Rebecca G.; Deych, Stella; Pelletier, Patrick; Kressin, Nancy R.	2019	Safety Net Hospital; Academic Health Center; Boston Medical Center	Northeast US	Adults receiving primary care	Urban adult primary care	An EHR-based social determinants of health (SDOH) screening and referral model, adapted from the WE CARE model for pediatrics, was implemented in urban adult primary care.
6	Documentation and review of social determinants of health data in the EHR: measures and associated insights.	Wang, Michael; Pantell, Matthew S.; Gottlieb, Laura M.; Adler-Milstein, Julia	2021	UCSF Health, an academic medical center that includes 4 hospitals and a large number of ambulatory clinics.	Not Specified	all patients who were hospitalized at least once at any UCSF Health hospital between February 1, 2019, and February 1, 2020.	not discussed	not discussed
7	Effect of Community Health Workers on 30-Day Hospital Readmissions in an Accountable Care Organization Population: A Randomized Clinical Trial.	Carter, Jocelyn; Hassan, Susan; Walton, Anne; Yu, Liyang; Donelan, Karen; Thorndike, Anne N.	2021	Academic Medical Center	Northeast Boston	Adults at risk for hospital readmission	Target population based on high risk for inpatient readmission	Community Health Work services to address unmet clinical and social needs post discharge
8	The impact of enhancing self-management support for diabetes in Community Health Centers through patient engagement and relationship building: a primary care pragmatic cluster-randomized trial.	Hessler, Danielle; Fisher, Lawrence; Dickinson, Miriam; Dickinson, Perry; Parra, José; Potter, Michael B.	2022	Community Health Center Clinical Sites	Western	Chronic disease patients	Type 2 Diabetes	Doctor-patient relationship building; self-management support; patient engagement; care coordination; social risk referral and maangement; behavior management
9	Online Telehealth Delivery of Group Mental Health Treatment Is Safe, Feasible, and Increases Enrollment and Attendance in Post-9/11 U.S. Veterans.	Fortier, Catherine B.; Currao, Alyssa; Kenna, Alexandra; Kim, Sahra; Beck, Brigitta M.; Katz, Dylan; Hursh, Colleen; Fonda, Jennifer R.	2022	Medical Center; Veteran's Affairs Health System	Northeast	Mental health	PTSD; military reintegration	Telemental health services; STEP-home workshop
10	Computerized Intervention in Primary Care for Women Veterans with Sexual Assault Histories and Psychosocial Health Risks: a Randomized Clinical Trial.	Creech, Suzannah K.; Pulverman, Carey S.; Kahler, Christopher W.; Orchowski, Lindsay M.; Shea, M. Tracie; Wernette, Golfo Tzilos; Zlotnick, Caron	2022	Medical Center; Veteran's Affairs Health System	Southwest - Texas	Veteran Women Sexual Assault Suvivors	Sexual Assault Survivorship	Digital health intervention health education mobile application for sexual assault survivors
11	Bridge to Health/Puente a la Salud: a pilot randomized trial to address diabetes self-management and social needs among high-risk patients.	Fitzpatrick, Stephanie L.; Papajorgji-Taylor, Dea; Schneider, Jennifer L.; Lindberg, Nangel; Francisco, Melanie; Smith, Ning; Vaughn, Katie; Vrany, Elizabeth A.; Hill-Briggs, Felicia	2022	Kaser Permanente Northwest	Northwest	Chronic disease patients (African American and Hispanic, Low-Income)	Type 2 Diabetes	Navigation support, including referrals to address social needs; and diabetes self-management support through community health workers
12	Impact of a Low-Intensity Resource Referral Intervention on Patients' Knowledge, Beliefs, and Use of Community Resources: Results from the CommunityRx Trial.	Tung, Elizabeth L.; Abramsohn, Emily M.; Boyd, Kelly; Makelarski, Jennifer A.; Beiser, David G.; Chou, Chiahung; Huang, Elbert S.; Ozik, Jonathan; Kaligotla, Chaitanya; Lindau, Stacy Tessler	2020	Academic Medical Center	Midwest	Low-income, publicly insured population at-risk for chronic conditions and behavioral disorders	Depression, Diabetes, Smioking, Hypertension, Obestity	Community Rx: low-intensity health IT intervention to deliver resource referrals
13	Patient navigation to address sociolegal barriers for patients with cancer: A comparative-effectiveness study.	Battaglia, Tracy A.; Gunn, Christine M.; Bak, Sharon M.; Flacks, JoHanna; Nelson, Kerrie P.; Wang, Na; Ko, Naomi Y.; Morton, Samantha J.	2022	Safety-net medical center in Boston	Northeast	Targeted towards minority non-english speaking population with cancer on public insurance, facing one or more perceived sociolegal barrier such as housing and employment, but does not specifically include measures of health disparity or equity	Cancer; lung cancer; breast cancer	Enhanced navigation support to address socio-legal barriers
14	Nurse-led hospital-to-community care, clinical outcomes for people living with HIV and health-related social needs	Moen, Marik; Doede, Megan; Johantgen, Meg; Taber, Deborah; Adesanya, Ikmat; Werthman, Emily; Friedmann, Erika	2022	Medical Center	Northeast	Chronic disease patients, vulnerable populations; with HIV	HIV	Linkage to Care; Linkage to Care with Transitional Care to Community
15	Improving Diabetes Care Through Population Health Innovations and Payments: Lessons from Western Maryland.	Wang, Gary X.; Gauthier, Richard; Gunter, Kathryn E.; Johnson, Lori; Zhu, Mengqi; Wan, Wen; Tanumihardjo, Jacob P.; Chin, Marshall H.	2023	Academic Medical Center; Upitt Med Center	MidAtlantic US Maryland, US	One hundred forty-one adult patients with uncontrolled diabetes (HbA1c > 7%) and one or more social needs who were enrolled between 2018 and 2021.	Diabetes	Team-based interventions that provided interdisciplinary care coordination (e.g., diabetes care coordinators), social needs support (e.g., food delivery, benefits assistance), and patient education (e.g., nutritional counseling, peer support).
16	Financing Diabetes Care in the U.S. Health System: Payment Innovations for Addressing the Medical and Social Determinants of Health.	Saulsberry, Loren; Peek, Monica	2019	Center for Medicare and Medicaid Innovation (CMMI) within the Centers for Medicare and Medicaid Services (CMS)	Not Documented	Medicaid patients with diabetes	Diabetes	establishing connections with a local food pantry or providing food coupons to patients with diabetes in order to increase access to healthy foods. Other examples include educating patients on diabetes self-management, educating providers on best practices for working with patients with diabetes, and enriching community relationships to build social capital in the community setting.
17	Clinical and Sociobehavioral Prediction Model of 30-Day Hospital Readmissions Among People With HIV and Substance Use Disorder: Beyond Electronic Health Record Data.	Nijhawan, Ank E.; Metsch, Lisa R.; Zhang, Song; Feaster, Daniel J.; Gooden, Lauren; Jain, Mamta K.; Walker, Robrina; Huffaker, Shannon; Mugavero, Michael J.; Jacobs, Petra; Armstrong, Wendy S.; Daar, Eric S.; Sullivan, Meg; Del Rio, Carlos; Halm, Ethan A.	2019	Safety-net medical center	The study was conducted in multiple geographic regions across the United States, including Atlanta, Georgia; Baltimore, Maryland; Boston, Massachusetts; Birmingham, Alabama; Chicago, Illinois; Dallas, Texas; Los Angeles, California; Miami, Florida; New York, New York; and Philadelphia and Pittsburgh, Pennsylvania.	hospitalized patients with HIV and substance use disorder.	This study primarily addressed two key diseases or conditions: HIV (Human Immunodeficiency Virus): The study focused on individuals who were hospitalized and living with HIV. Substance Use Disorder: The study specifically targeted individuals with substance use disorders, which includes alcohol and substance abuse.	validation of prediction models for 30-day hospital readmissions among individuals with HIV and substance use. collected extensive socio-economic and socio-behavioral data through patient interviews and integrated this information into the EHR. The research highlighted the impact of social determinants on readmission risk, emphasizing the importance of addressing these factors, especially in safe…
18	Effects of a standardized community health worker intervention on hospitalization among disadvantaged patients with multiple chronic conditions: A pooled analysis of three clinical trials.	Vasan, Aditi; Morgan, John W.; Mitra, Nandita; Xu, Chang; Long, Judith A.; Asch, David A.; Kangovi, Shreya	2020	Trial one (n = 446) tested two weeks of IMPaCT among hospitalized general medical patients. Trial two (n = 302) tested six months of IMPaCT among outpatients at two academic primary care clinics. Trial three (n = 592) tested six months of IMPaCT among outpatients at academic, Veterans Affairs (VA), and Federally Qualified Health Center primary care practices.	Northeast; Philadelphia	Participants were patients living in high-poverty regions of Philadelphia and were predominantly Medicaid insured. They were randomly assigned to receive usual care versus IMPaCT, an intervention in which CHWs provide tailored social support, health behavior coaching, connection with resources, and health system navigation.	Multiple chronic conditions: hypertension; diabetes; obesity; tobacco	Community Health Workers provide social support and referrals to address social needs
19	Screening for health-related social needs in the emergency department: Adaptability and fidelity during the COVID-19 pandemic.	Murray, Evangelia; Roosevelt, Genie E.; Vogel, Jody A.	2022	Safety-net medical center	Not Specified	patients covered by Medicare and Medicaid.	primarily focuses on the screening and identification of health-related social needs (HRSN) and does not specifically mention the diseases, conditions, or behaviors addressed.	1. Screening for HRSN was performed by patient navigators using the validated Accountable Health Communities (AHC) Screening Tool, which includes questions related to food insecurity, housing instability, transportation needs, utility assistance, and interpersonal safety. 2. Patients who screened positive for HRSN were provided with handouts listing community resources to address their needs. 3. …
20	Food Insecurity in Older Adults in an Integrated Health Care System	Steiner JF, Stenmark SH, Sterrett AT, Paolino AR, Stiefel M, Gozansky WS, Zeng C.	2018	Health system	West coast	Low income	Food insecurity	Prevalence of food security analysis
21	Development and Implementation of a Maryland State Program Providing Hospital Payment Incentives for Reduction in Readmission Disparities.	Rice, Kyle; Schuster, Alyson; Pack, Allan; Dougherty, Geoff B.	2023	Not specified	Maryland (Mid-Atlantic)	primarily discusses the impact on racial disparities, particularly among Black patients.	discusses the readmission rates for various conditions, including acute myocardial infarction, congestive heart failure, pneumonia, and surgical patients, and how disparities in readmission rates are affected by social factors and socioeconomic status. It doesn't go into specific diseases, conditions, or behaviors in detail, but the program's focus is on reducing disparities in readmission rates …	primarily focuses on the development and implementation of the Maryland State Readmission Reduction Incentive Program (RRIP), which provides hospitals with financial incentives to reduce disparities in readmission rates, particularly related to social factors and socioeconomic status. The services provided are related to data collection, analysis, and financial incentives to reduce disparities in…
22	Implementation fidelity to a behavioral diabetes prevention intervention in two New York City safety net primary care practices.	Gupta, Avni; Hu, Jiyuan; Huang, Shengnan; Diaz, Laura; Gore, Radhika; Levy, Natalie; Bergman, Michael; Tanner, Michael; Sherman, Scott E.; Islam, Nadia; Schwartz, Mark D.	2023	Two NYC Safety Net patient-centered medical homes (PCMHs) at either, VA NY Harbor or at Bellevue Hospital (BH)	New York City; Northeast	Adults, low-income with diabetes	Diabetes	Community Health Outreach to Reduce Diabetes), a pragmatic, cluster-randomized, controlled trial to test the impact of a Community Health Workers (CHW)-led health coaching intervention to prevent incident type 2 Diabetes Mellitus in New York (NY).
23	Implementing CenteringPregnancy Group Prenatal Care for Minority Women Living with HIV at an Urban University Hospital.	Potter, JoNell E.; Duthely, Lunthita M.; Diaz-Mendez, Nelly; Smith, Lindsay; Messick, Barbara J.; Echenique, Maria; Galli, Johnny; Yasin, Salih; Villar-Loubet, Olga	2019	Academic Health Center	Miami, Florida, Southeast	pregnant women living with HIV.	HIV in pregnant women.	provision of prenatal care services for pregnant women living with HIV
24	Management of Isolated Skull Fractures in Pediatric Patients: A Systematic Review.	Donaldson, Katelyn; Li, Xun; Sartorelli, Kennith H.; Weimersheimer, Peter; Durham, Susan R.	2019	Not specified	Not specified	pediatric patients.	isolated linear skull fractures in pediatric patients.	development of an evidence-based protocol for managing isolated linear skull fractures in pediatric patients, with a focus on whether these patients can be safely discharged without admission.
25	Health Center-Based Community-Supported Agriculture: An RCT.	Berkowitz, Seth A.; O'Neill, Jessica; Sayer, Edward; Shahid, Naysha N.; Petrie, Maegan; Schouboe, Sophie; Saraceno, Megan; Bellin, Rochelle	2019	Community Health Center	Northeast - Massachussetts	Socioeconomically vulnerable adults with high BMI	BMI; eating behaviors	Healthy eating intervention through health center based community supported agriculture
26	Effects of In-Person Assistance vs Personalized Written Resources About Social Services on Household Social Risks and Child and Caregiver Health: A Randomized Clinical Trial.	Gottlieb, Laura M.; Adler, Nancy E.; Wing, Holly; Velazquez, Denisse; Keeton, Victoria; Romero, Abigail; Hernandez, Maricarmen; Munoz Vera, Andrea; Urrutia Caceres, Elizabeth; Arevalo, Catherine; Herrera, Philip; Bernal Suarez, Mara; Hessler, Danielle	2020	Safety net hospital; large; urban; pediatric urgent care	Western (San Francisco)	Child-Caregiver dyads (English and/or Spanish speaking)	Household social risk	In-Person Assistance and Personalized Written Resources About Social Services
27	Feasibility of a family-centered intervention for depressed older men in primary care.	Hinton, Ladson; La Frano, Erika; Harvey, Danielle; Alfaro, Eduardo Delgadillo; Kravitz, Richard; Smith, Andrew; Apesoa-Varano, Ester Carolina; Jafri, Asma; Unutzer, Jurgen	2019	FQHC; safety net	Western UC Davis	Spanish and English Speaking Adult Men	Depression	Family centered depression clinic in a primary care setting
28	Intensive care management for high-risk veterans in a patient-centered medical home - do some veterans benefit more than others?	Swankoski, Kaylyn E.; Reddy, Ashok; Grembowski, David; Chang, Evelyn T.; Wong, Edwin S.	2023	VA Healthcare System	Western Seattle	Veterans at risk for hospitalization	High cost healthcare utilization	Primary care intensive management services to prevent high cost utilization
29	Pragmatic Clinical Trial to Improve Patient Experience Among Adults During Transitions from Hospital to Home: the PArTNER study.	LaBedz, Stephanie L.; Prieto-Centurion, Valentin; Mutso, Amelia; Basu, Sanjib; Bracken, Nina E.; Calhoun, Elizabeth A.; DiDomenico, Robert J.; Joo, Min; Pickard, A. Simon; Pittendrigh, Barry; Williams, Mark V.; Illendula, Sai; Krishnan, Jerry A.	2022	Minority Serving Hospital MSH	Midwestern, US; Chicago, IL	Hospitalized for chronic conditions, heart failure, pneumonia, etc in minority serving hospitals	Healthcare utilization; emotional, social, and physical health at 30 days post discharge	Navigator intervention vs. Usual care on post-hospital patient experience, outcomes, and healthcare utilization. Delieverd by community health workers
30	Medical-Legal Partnership Effects on Mental Health, Health Care Use, and Quality of Life in Primary Care: A Randomized Clinical Trial.	Liaw, Winston; Northrup, Thomas F.; Stotts, Angela L.; Bakos-Block, Christine; Suchting, Robert; Chen, Alvin; Hernandez, Abigail; Finzetto, Lisandra; Green, Charles; Murphy, Thomas	2023	Academic Medical Center; Primary care setting	Southwest; Texas; Utexas Health Sciences Center	Eligible participants were low income (earning less than 200% of the federal poverty level), 18 years of age or older, spoke English or Spanish, and screened positive for Health Harming Legal Needs HHLNs.	mental health, health care use, and quality of life	Referral to a medical-legal partnership (MLP) in primary care setting
31	Predictive Model-Driven Hotspotting to Decrease Emergency Department Visits: a Randomized Controlled Trial.	Post, Brady; Lapedis, Jeremy; Singh, Karandeep; Valenstein, Paul; Büyüktür, Ayşe G.; Teske, Karin; Ryan, Andrew M.	2021	Academic Medical Center	Midwest US; Michigan	Adults at risk for emergency visits or admissions	High risk healthcare utilization; ED visits and inpatient admissions	Community-based case management; coordinated case management across medical, mental health, and social service organizations.
32	A care coordinator screening strategy to address health harming legal needs	Berg, Daniel; Setrini, Alice; Chan, Kathy; Cibulskis, Ann; Ameji, Kulsum; Hinami, Keiki	2022	Cook County Health- public helathcare system	Midwestern, US; Chicago, IL	not specified	not discussed	legal assistance
33	Evidence that collaborative action between local health departments and nonprofit hospitals helps foster healthy behaviors in communities: a multilevel study	Geri Rosen Cramer; Young, Gary J; Singh, Simone; McGuire, Jean; Kim, Daniel	2021	Multicenter Study across 32 locations	Not Specified	not specified	Healthy eating and lifestyle habits	not discussed
34	Hospital Partnerships for Population Health: A Systematic Review of the Literature	Hilts Katy Ellis; Yeager, Valerie A; Joseph, Gibson P; Halverson, Paul K; Blackburn, Justin; Menachemi Nir	2021	Multiple types	Not Documented	Not specified	not discussed	not discussed
35	Medicaid Investments To Address Social Needs In Oregon And California	Alderwick, Hugh; Hood-Ronick, Carlyn M; Gottlieb, Laura M	2019	Coordinated Care Organizations	Oregon and California	High healthcare utilizers, multiple service utilizers, homeless clients, behavioral health patients	No specific disease or condition	Explored alternative payment methods, food coupons, home construction, referral to atttorneys
36	Enabling Services Improve Access To Care, Preventive Services, And Satisfaction Among Health Center Patients	Yue, Dahai; Pourat, Nadereh; Chen, Xiao; Lu, Connie; Zhou, Weihao; Daniel, Marlon; Hoang, Hank; Sripipatana, Alek; Ponce, Ninez A	2019	HRSA funded Health centers/Safety Hospitals	National	Adults with chronic conditions	COPD, CVD, Obesity, Asthma, Diabetes, Mental health	Improved access
37	A Social-Return-On-Investment Analysis Of Bon Secours Hospital's 'Housing For Health' Affordable Housing Program	Drabo, Emmanuel Fulgence; Eckel, Grace; Ross, Samuel L; Brozic, Michael; Carlton, Chanie G; Warren, Tatiana Y; Kleb, George; Laird, Aurelia; Porter, Keshia M Pollack; Pollack, Craig Evan	2021	Bon Secours Hospital is a community hospital with seventy-two li- censed beds and annual operating revenues of approximately $121 million. It is part of a larger hospital system, the Bon Secours Mercy Health System. (Can be inferred that this may be classified as a safety net hospital, which typically provides healthcare services to underserved populations.)	Mid-Atlantic, Northeast	Low-income residents of Maryland, seniors	No specific disease or condition	Affordable housing and on-site services, with a particular emphasis on reducing loneliness among seniors
38	Embedding Social Workers In Veterans Health Administration Primary Care Teams Reduces Emergency Department Visits	Cornell, Portia Y; Halladay, Christopher W; Ader, Joseph; Halaszynski, Jaime; Hogue, Melinda; McClain, Cristian E; Silva, Jennifer W; Taylor, Laura D; Rudolph, James L	2020	Veterans Health Administration's rural primary clinic	18 states from different regions.	This study included veterans who had at least one primary care visit at a site that initiated participation in the program in the period October 1, 2016–June 30, 2019.	Hospital admissions, Emergency department visits, social work encounters	Introduction of a social worker
39	Project Nurture Integrates Care And Services To Improve Outcomes For Opioid-Dependent Mothers And Their Children	McConnell, K John; Kaufman, Menolly R; Grunditz, Jenny I; Bellanca, Helen; Risser, Amanda; Rodriguez, Maria I; Renfro, Stephanie	2020	The implementation of Project Nurture was funded by Health Share of Oregon, a coordinated care organization	Northwest	Women covered by Medicaid who had a hospital birth and concurrent diagnosis of opioid use disorder (OUD) in the period 2012–17 excluding those with a concurrent diagnosis of methamphetamine use. Mother and their child.	• Project Nurture primarily addressed substance use disorders, specifically opioid use disorder (OUD), in pregnant women enrolled in Medicaid. It aimed to improve outcomes for both the mothers and their children. • The program integrated maternity care, substance use treatment, and social service coordination for this population. • The study assessed the impact of Project Nurture on a range of pa…	• Project Nurture integrated maternity care, substance use treatment, and social service coordination for opioid-dependent women enrolled in Medicaid. • It provided peer support, clinical care, and links to social services in a respectful and nonjudgmental environment. • The model emphasized building and maintaining trust between clinicians and patients, as well as establishing a transparent rela…
40	Addressing the Poverty Barrier in Collaborative Care for Adults Experiencing Homelessness: A Case-Based Report	Cabán-Alemán Carissa; Iobst Saraswati; Luna, Aniuska M; Foster, Adriana	2020	Federally Qualified Health Center (FQHC)	Southeast	Adults experiencing homeless- ness and receiving primary care in a Federally Qualified Health Center (FQHC) located in Downtown Miami, Florida.	Depression and Homelessness	Nutritional advice Provision of materials to promote mindfulness and enhance cogni- tion (e.g. notebooks for journaling and puzzle books) Relapse prevention plan Behavioral and educational interven- tions to improve function (e.g. motivational interviewing, CBT, sleep hygiene and burnout preven- tion education) Referral to free language class, social worker, vocational program, food stamps, shelt…
41	Interprofessional, multitiered daily rounding management in a high-acuity hospital	Eamranond, Pracha Peter; Bhukhen, Arti; DiPalma, Donna; Schawan Kunuakaphun; Burke, Thomas; Rodis, John; Grey, Michael	2020	Saint Francis Hospital is a major teaching hospital and the largest Catholic hospital in New England.	Northeast	Patients of Saint Francis Hospital and Medical Center (SFHMC)	LOS,SSEs, HAIs, hospital-acquired pressure injuries as well as improved patient experience	implementation of interprofessional, multitiered lean daily management (LDM) and to quantitatively report its impact on hospital safety
42	Indianapolis Provider's Use Of Wraparound Services Associated With Reduced Hospitalizations And Emergency Department Visits	Vest, Joshua R; Harris, Lisa E; Haut, Dawn P; Halverson, Paul K; Menachemi, Nir	2018	Safety net hospital	North-central	Adults ages eighteen and older who received care from Eskenazi Health in the period 2006–16.	Social, behavioral, and environmental factors that drive poor patient health and increase costs. Number of subsequent hospitalizations and ED visits	Five wraparound services: behavioral health, social work, dietet- ics, respiratory therapy (for asthma education), and patient navigation.
43	Reasons for Social Work Referrals in an Urban Safety-Net Population: A Natural Language Processing and Market Basket Analysis Approach.	Bako, Abdulaziz T.; Walter-McCabe, Heather; Kasthurirathne, Suranga N.; Halverson, Paul K.; Vest, Joshua R.	2021	Federally Qualified Health Center; safety net	Midwestern US (Indianapolis)	all adult patients aged 18 years and above	No specific disease or condition	Identification of patients with unmet social needs and referral to onsite social workers and other providers of wraparound services (dieticians, patient navigators, financial counselors, etc.) to address patients’ social, behavioral, and environ- mental needs.
44	The Impact of Food Insecurity Screenings and Community Food Resource Referrals for Patients with Type 2 Diabetes.	Ofili, Miriam Ngozi; Lawson, Robin M.	2020	Federally Qualified Health Center	Western	Adult patients over the age of 18 years with a diagnosis of Type 2 diabetes and Food Insecurity	Type 2 diabetes	Patients screened for food insecurity (FI) using PREPARE tool; FI-positive patients referred to community food resources through the CRN application; Clinic staff confirmed outreach within 2 weeks; PI conducted 12-week follow-up phone interviews for resource utilization and barriers.
45	The implementation cost of a safety‐net hospital program addressing social needs in Atlanta.	MacLeod, Kara E.; Chapel, John M.; McCurdy, Matthew; Minaya‐Junca, Jasmin; Wirth, Diane; Onwuanyi, Anekwe; Lane, Rashon I.	2021	Safety Net Hospital	Southeastern (Atlanta)	Patients who have a documented diagnosis of heart failure and an absence of other major medical problems.	Heart Failure	Cost coverage of the initial 30-day medication supply, Financial counseling to assess financial status to access future medical and social services from the GHS as well as to help identfy eligibility for other resources, Free ride services to those most in need, Mobile health visits for patients confined at home, Referrals to community services through a Community Health Worker
46	Development of a homelessness risk screening tool for emergency department patients.	Doran, Kelly M.; Johns, Eileen; Zuiderveen, Sara; Shinn, Marybeth; Dinan, Kinsey; Schretzman, Maryanne; Gelberg, Lillian; Culhane, Dennis; Shelley, Donna; Mijanovich, Tod	2022	Safety Net Hospital	Northeast	ED patients who were >=18 yrs living inside NYC and speakng English/Spanish	No specific disease or condition	Development of a simple three-item screening tool that identified risk for future homelessness with high sensitivity.
47	An embedded multiple case study: using CFIR to map clinical food security screening constructs for the development of primary care practice guidelines.	Taher, Sabira; Muramatsu, Naoko; Odoms-Young, Angela; Peacock, Nadine; Michael, C. Fagen; Courtney, K. Suh	2022	1) Primary Care clinics in a publc, government funded healthcare system 2) Private, Academic Medical Center	Mid-Western (Cook County in Illinois)	All patients who visited the clinics	No specific disease or condition	Program A: Food security screening, mobile food truck, enrollment/referral to benefits program Program B: Food security screening, onsite food distribution, enrollment to benefits program
48	Conceptualizing the effective mechanisms of a social needs case management program shown to reduce hospital use: a qualitative study.	Fleming, Mark D.; Safaeinili, Nadia; Knox, Margae; Hernandez, Elizabeth; Esteban, Emily E.; Sarkar, Urmimala; Brewster, Amanda L.	2022	Contra Costa Health Services - an integrated system of healthcare services, community health improvement and environmental protection	Western (California)	Patients with Medicaid Insurance and moderately high risk of acute care utilization	High risk of acute care utilization	Case managers provided initial social needs screening, psychosocial support and motivational interviewing, and coordinating medical and social services. CommunityConnect directly provided mobile phones, transportation vouch- ers, and housing vouchers to patients with needs for these resources.
49	Social Needs Screening and Referral Program at a Large US Public Hospital System, 2017.	Berry, Carolyn; Paul, Margaret; Massar, Rachel; Marcello, Roopa Kalyanaraman; Krauskopf, Marian	2020	Public Hospital System (Ambulatory care clinics)	Northeast	Patients with scheduled appointments	Not specified	Screening for social needs and referral to government or community-based resources
50	A Nurse-Led Intervention to Address Food Insecurity in Chicago.	Grenier, Jennifer; Wynn, Nicole	2018	Academic Medical Center	Midwest	Food inseure individuals and families	Not specified	Repackaging unserved prepared foods from area cafeterias into meals in individual or family-size portions and sending to recipent organizations. The recipient organizations distribute the meals to clients.
51	Training Student Volunteers as "Community Resource Navigators" to Integrate Health and Social Care in Primary Care.	Gautam, Diwas; Kutzer, Kate; Sandhu, Sahil; Dennis, Erika; Xu, Jacqueline; Blanchard, Lilian; Munoz, Veronica; Drake, Connor; Crowder, Carolyn; Eisenson, Howard; Bettger, Janet	2022	Federally Qualified Health Center	Southeastern	Clinic patients	No specific disease or condition or behaviors addressed	Case managers screen clinic patients for social needs using the PRAPARE screening tool and refer them to resources internal to the FQHC or to community-based resources. Student volunteer “community resource navigators” follow-up with patients telephonically in English or Spanish to help patients overcome potential barriers and encourage the initiation of services or uptake of community resources.
52	An In-Clinic Food Pharmacy Addresses Very Low Food Security.	Cooper, Emily; Mohanan, Sveta; Garcia, Christina; Thomas, Tamara Baldwin; Ozgun, Holly; Hernandez, Brisa; Cheng, Iris; Cole, Alisahah J.	2020	Medical Clinic	Southeastern	Adult English and Spanish-speaking patients	N/A	Patients screened for food insecurity, Food insecure patients refered to the in-clinic food phramacy for a 2-day emergenncy supply of food as well as to the in-house social worker to discuss longer term solutions to food insecurity, Additional resources were pro- vided that would address the need of others in their household.
53	Evidence based processes to prevent readmissions: more is better, a ten-site observational study.	Pugh, Jacqueline; Penney, Lauren S.; Noël, Polly H.; Neller, Sean; Mader, Michael; Finley, Erin P.; Lanham, Holly J.; Leykum, Luci	2021	Veterans Affairs	Texas	Veterans at risk for readmission	Chronic conditions; High risk for readmission	Transitional care services addressing unmet social needs
54	Unmet Social Needs and No-Show Visits in Primary Care in a US Northeastern Urban Health System, 2018–2019.	Fiori, Kevin P.; Heller, Caroline G.; Rehm, Colin D.; Parsons, Amanda; Flattau, Anna; Braganza, Sandra; Lue, Kelly; Lauria, Molly; Racine, Andrew	2020	Urban health system (19 primary care practices)	Northeastern; Bronx	Adults	No-shows	SDOH screening and referrals
55	Cooling The Hot Spots Where Child Hospitalization Rates Are High: A Neighborhood Approach To Population Health	Beck, Andrew F; Anderson, Kristy L; Rich, Kate; Taylor, Stuart C; Iyer, Srikant B; Kotagal, Uma R; Kahn, Robert S	2019	Children's medical center	East North Central; Cincinnati, Ohio	Children	Child hospitalization rates	Neighborhood approach to population health: Use of quality improvement methods, including chronic disease management, transitions of care; and mitigation of social risk to reduce neighborhood disparities and promote equity: We relied upon quality improvement methods and a learning health system approach. Interventions included the optimization of chronic disease management; transitions in care; m…
56	Quantifying Health Systems' Investment In Social Determinants Of Health, By Sector, 2017–19	Horwitz, Leora I; Chang, Carol; Arcilla, Harmony N; Knickman, James R	2020	Health systems	National	Socially disadvantaged patients and communities	Housing insecurity; food insecurity; transporttaion barriers	Financial investment in SDOH
57	Prescribing Housing: A Scoping Review of Health System Efforts to Address Housing as a Social Determinant of Health.	Koeman, Jamison; Mehdipanah, Roshanak	2021	Health systems	National	Socially disadvantaged patients and communities	Housing instability	Financial investment in housing
58	The Baltimore Community-Based Organizations Neighborhood Network: Enhancing Capacity Together (CONNECT) Cluster RCT.	Wu, Albert W.; Weston, Christine M.; Ibe, Chidinma A.; Ruberman, Claire F.; Bone, Lee; Boonyasai, Romsai T.; Hwang, Sandra; Gentry, Janice; Purnell, Leon; Lu, Yanyan; Liang, Shuwen; Rosenblum, Michael	2019	Academic medical center	Maryland - Mid Atlantic	Socially disadvantaged patients	Healthcare use	Referrals to CBOs
59	Effect of Community Health Worker Support on Clinical Outcomes of Low-Income Patients Across Primary Care Facilities: A Randomized Clinical Trial.	Kangovi, Shreya; Mitra, Nandita; Norton, Lindsey; Harte, Rory; Zhao, Xinyi; Carter, Tamala; Grande, David; Long, Judith A.	2018	Three health systems; primary care	Pennsylvania - Northeast	Patients who resided in a high-poverty zip code, were uninsured or publicly insured, and who had a diagnosis for 2 or more chronic diseases were recruited, and patients were randomized to either the CHW intervention or the control arm (goal setting only).	Self health rating; perceived quality of care; healthcare utilization	Community Health Workers - IMPACT study - Individualized goal setting and sisese management
60	Food for Thought: A Randomized Trial of Food Insecurity Screening in the Emergency Department.	Cullen, Danielle; Woodford, Ashley; Fein, Joel	2019	Children's Hospitall; ED	Pennsylvania - Northeast	Children; Pediatric emergency department population	Food insecurity screening	This study compares food insecurity disclosure rates in face-to-face interviews versus electronic formats, and explores caregiver preferences regarding screening modality and location, in a large, urban pediatric emergency department.
61	Effect of a Peer-Led Behavioral Intervention for Emergency Department Patients at High Risk of Fatal Opioid Overdose: A Randomized Clinical Trial.	Beaudoin, Francesca L.; Jacka, Brendan P.; Li, Yu; Samuels, Elizabeth A.; Hallowell, Benjamin D.; Peachey, Alyssa M.; Newman, Roxxanne A.; Daly, Mackenzie M.; Langdon, Kirsten J.; Marshall, Brandon D. L.	2022	2 emergency departments- Academic tertiary care hospitals and high volume community based affiliated.	Northeast US	patients who received treatment related to opioid overdose at the time of visit or they were identified as having had an opioid overdose within the previous 12 months	substance use disorder	not discussed
62	Patient plus partner trial: A randomized controlled trial of 2 interventions to improve outcomes after an initial implantable cardioverter-defibrillator.	Dougherty, Cynthia M.; Thompson, Elaine A.; Kudenchuk, Peter J.	2019	Acute care institutions	south, west	patients with first time implantable cardioverte-ICD device	Cardiovascular diseases, anxiety and depression	not discussed
63	Illustrating the value of social work: results of an open pilot trial of the psychosocial acuity scale in a large urban pediatric hospital.	Sable, Paige; Ross, Abigail; Clock, Annie; Corder, Brooke; Lamontagne, Nicole; McCaig, Jessica; Shanske, Susan; Tvedte, Matthew; Cummings, Jennifer; Chamorro, Pamela	2021	Children's (Pediatric) hospital - Large urban	Northeast	Children	Psychosocial risks documentation in medical record	Improving social work documentation of psychosocial risks in medical record
64	Using Publicly Available Data to Understand the Opioid Overdose Epidemic: Geospatial Distribution of Discarded Needles in Boston, Massachusetts	Bearnot, Benjamin, MD; Pearson, John F, MD; Rodriguez, Jorge A, MD	2018	Mass General	Northeast, Boston	At risk for opioid overdose	Opioid overdose	Hot spotting through geospatial analysis. We performed cluster analysis with Anselin Local Moran’s I19,20 to determine statistically significant hot spots (clusters of high needle density), cold spots (clusters of low needle density), and outlier clusters.
65	Predictors for Poor Linkage to Care Among Hospitalized Persons Living with HIV and Co-Occurring Substance Use Disorder.	Summers, Nathan A.; Colasanti, Jonathan A.; Feaster, Daniel J.; Armstrong, Wendy S.; Rodriguez, Allan; Jain, Mamta K.; Jacobs, Petra; Metsch, Lisa R.; Del Rio, Carlos	2020	Academic Medical Center	Southeast , Georgia	People living with HIV	HIV	Patient navigation services for people living with HIV
66	Enhanced care planning and clinical-community linkages versus usual care to address basic needs of patients with multiple chronic conditions: a clinician-level randomized controlled trial.	Krist, Alex H.; O'Loughlin, Kristen; Woolf, Steven H.; Sabo, Roy T.; Hinesley, Jennifer; Kuzel, Anton J.; Rybarczyk, Bruce D.; Kashiri, Paulette Lail; Brooks, E. Marshall; Glasgow, Russel E.; Huebschmann, Amy G.; Liaw, Winston R.	2020	Academic Medical Center	Mid-Atlantic, Virginia	People living with multiple chronic conditions MCC	MCC	Patient navigation and clinical-community linkages
67	Social Risks Among Primary Care Patients in a Large Urban Health System.	Heller, Caroline G.; Parsons, Amanda S.; Chambers, Earle C.; Fiori, Kevin P.; Rehm, Colin D.	2020	FQHC, Federally Qualified Health Centers (19 ambulatory sites within a health system in the Bronx, NY.)	Northeast; New York	primary care patients routinely screened in a large urban health system.	N/A	10-item social risk screener implementation in 19 ambulatory sites within a health system in the Bronx, NY.
68	Relationship of Neighborhood Deprivation and Outcomes of a Comprehensive ST-Segment-Elevation Myocardial Infarction Protocol.	Huded, Chetan P.; Dalton, Jarrod E.; Kumar, Anirudh; Krieger, Nikolas I.; Kassis, Nicholas; Phelan, Michael; Kravitz, Kathleen; Reed, Grant W.; Krishnaswamy, Amar; Kapadia, Samir R.; Khot, Umesh	2021	Tertiary care medical center within a multihos- pital regional STEMI system	Midwest, Cleveland, Ohio	Moderate or high deprivation neighborhoods.	door-to-balloon time (D2BT), which refers to the time from patient arrival at the emergency department (ED) until the time of intracoronary device deployment that restored flow in the culprit vessel . in-hospital mortality, which was recorded prospectively as part of data abstraction for the CathPCI Registry . Use of guideline-directed medical therapy (GDMT) before percutaneous coronary intervent…	Application of comprehensive ST-segment– elevation myocardial infarction protocol focusing on guideline-directed medical therapy, transradial percutaneous coronary intervention, and rapid door-to-balloon time that improves process and outcome metrics in patients with moderate or high socioeconomic deprivation.
69	Enhancing Reach Out and Read With a Video and Text Messages: A Randomized Trial in a Low-Income Predominantly Latino Sample.	Jimenez, Manuel E.; Crabtree, Benjamin F.; Hudson, Shawna V.; Mendelsohn, Alan L.; Lima, Daniel; Shelton, Patricia A.; Veras, Julissa; Lin, Yong; Pellerano, Maria; Morrow, Lesley; Strom, Brian L.	2021	Federally Qualified Health Center	NorthEast, New Jersey	primary caregiver (referred to as parent) of a child age 6–15 months presenting for a well child care visit, identified English or Spanish as their primary language, owned a cell phone, were age ≥18 years	Low-income background	Standard ROR: literacy-rich clinics, distribution of an age and language appropriate children’s book, and clinician guidance on shared reading. Enhanced ROR: standard ROR plus a video demonstrating dialogic reading viewed on a tablet during the visit and text messages for 6 months after the enrollment.
70	Social Needs Screening in Hospitalized Pediatric Patients: A Randomized Controlled Trial.	Lopez, Michelle A.; Yu, Xian; Hetrick, Rebecca; Raman, Shivani; Lee, Jessica; Hall, Julie; Tran, Katherine; Vonasek, Bryan; Garg, Arvin; Raphael, Jean; Bocchini, Claire	2023	Urban, quarternery care, Children's hospital	South Central	English-speaking caregivers (mothers) of patients 0 to 36 months of age	N/A	Social needs screening and resource referrals based on screening results and receptiveness to help

## Sheet: Review Question Q8
Review Question 8: State of Research on Hospital Initiated Initiatives to Address SDOH
Record #	Article Name	Author	Year	Article Type (e.g., Research, Review, Case Report)	Publication Date	Methodology Type (e.g., RCT, cohort study, etc.)	Does the study include any type of outcome measures? (Y/N)	Does the study include clinical outcome measures? (Y/N)	Does the study include SDOH outcome measures? (Y/N)
1	Missed psychosocial risk factors during routine preoperative evaluations are associated with increased complications after elective cancer surgery.	Meyers, Patrick M.; Leeds, Ira L.; Enumah, Zachary O.; Burkhart, Richard A.; He, Jin; Haut, Elliott R.; Efron, Jonathan E.; Johnston, Fabian M.	2019	research	2019 may 31	retrospective chart review	Yes	Yes	Yes
2	Outpatient Palliative Care for Noncancer Illnesses: One Program's Experience with Implementation, Impact, and Lessons Learned.	Bischoff, Kara E.; Lin, Joseph; Cohen, Eve; O'Riordan, David L.; Meister, Sarah; Zapata, Carly; Sicotte, Jeffrey; Lindenfeld, Paul; Calton, Brook; Pantilat, Steven Z.	2022	Case report	2022	Cohort study	Yes	Yes	No
3	Financial Incentives for Smoking Cessation in Hospitalized Patients: A Randomized Clinical Trial.	Ladapo, Joseph A.; Tseng, Chi-Hong; Sherman, Scott E.	2020	Research	2020	RCT	Yes	Yes	No
4	Real-World Disparities in Remote Follow-Up of Cardiac Implantable Electronic Devices and Impact of the COVID-19 Pandemic: A Single-Center Experience.	Lehmann, H. Immo; Sharma, Krishan; Bhatia, Roma; Mills, Theresa; Lang, Joshua; Li, Guoping; Andrews, Carl; Cullivan, Jay; Singh, Jagmeet; Mela, Theofanie	2023	Case report	2023	Retrospective Observational Cohort Study	Yes	Yes	Yes
5	Implementing an EHR-based Screening and Referral System to Address Social Determinants of Health in Primary Care.	Buitron de la Vega, Pablo; Losi, Stephanie; Sprague Martinez, Linda; Bovell-Ammon, Allison; Garg, Arvin; James, Thea; Ewen, Alana M.; Stack, Marna; DeCarvalho, Heloisa; Sandel, Megan; Mishuris, Rebecca G.; Deych, Stella; Pelletier, Patrick; Kressin, Nancy R.	2019	Research/Case Report	2019	Feasibility/observational study	Yes	No	Yes; but only collects data on process measures associated with SDOH screening implementation due to observational nature of study that seeks to implement EHR system for screening for SDOH
6	Documentation and review of social determinants of health data in the EHR: measures and associated insights.	Wang, Michael; Pantell, Matthew S.; Gottlieb, Laura M.; Adler-Milstein, Julia	2021	research	sep 21- 2021	documentation and review	No	No	No
7	Effect of Community Health Workers on 30-Day Hospital Readmissions in an Accountable Care Organization Population: A Randomized Clinical Trial.	Carter, Jocelyn; Hassan, Susan; Walton, Anne; Yu, Liyang; Donelan, Karen; Thorndike, Anne N.	2021	Research	2021	RCT	Yes	Yes	No
8	The impact of enhancing self-management support for diabetes in Community Health Centers through patient engagement and relationship building: a primary care pragmatic cluster-randomized trial.	Hessler, Danielle; Fisher, Lawrence; Dickinson, Miriam; Dickinson, Perry; Parra, José; Potter, Michael B.	2022	Research	2022	RCT Cluster Randomized Controlled Trial	Yes	Yes	Yes
9	Online Telehealth Delivery of Group Mental Health Treatment Is Safe, Feasible, and Increases Enrollment and Attendance in Post-9/11 U.S. Veterans.	Fortier, Catherine B.; Currao, Alyssa; Kenna, Alexandra; Kim, Sahra; Beck, Brigitta M.; Katz, Dylan; Hursh, Colleen; Fonda, Jennifer R.	2022	Research	2022	RCT	Yes	Yes	No
10	Computerized Intervention in Primary Care for Women Veterans with Sexual Assault Histories and Psychosocial Health Risks: a Randomized Clinical Trial.	Creech, Suzannah K.; Pulverman, Carey S.; Kahler, Christopher W.; Orchowski, Lindsay M.; Shea, M. Tracie; Wernette, Golfo Tzilos; Zlotnick, Caron	2022	Research	2022	RCT	Yes	Yes	No
11	Bridge to Health/Puente a la Salud: a pilot randomized trial to address diabetes self-management and social needs among high-risk patients.	Fitzpatrick, Stephanie L.; Papajorgji-Taylor, Dea; Schneider, Jennifer L.; Lindberg, Nangel; Francisco, Melanie; Smith, Ning; Vaughn, Katie; Vrany, Elizabeth A.; Hill-Briggs, Felicia	2022	Research	2022	RCT - Feasibility (Pilot) Trial	Yes	Yes	No
12	Impact of a Low-Intensity Resource Referral Intervention on Patients' Knowledge, Beliefs, and Use of Community Resources: Results from the CommunityRx Trial.	Tung, Elizabeth L.; Abramsohn, Emily M.; Boyd, Kelly; Makelarski, Jennifer A.; Beiser, David G.; Chou, Chiahung; Huang, Elbert S.; Ozik, Jonathan; Kaligotla, Chaitanya; Lindau, Stacy Tessler	2020	Research	2020	RCT	Yes	Yes	No
13	Patient navigation to address sociolegal barriers for patients with cancer: A comparative-effectiveness study.	Battaglia, Tracy A.; Gunn, Christine M.; Bak, Sharon M.; Flacks, JoHanna; Nelson, Kerrie P.; Wang, Na; Ko, Naomi Y.; Morton, Samantha J.	2022	Research	2022	RCT	Yes	Yes	Yes
14	Nurse-led hospital-to-community care, clinical outcomes for people living with HIV and health-related social needs	Moen, Marik; Doede, Megan; Johantgen, Meg; Taber, Deborah; Adesanya, Ikmat; Werthman, Emily; Friedmann, Erika	2022	Research	2022	Retrospective Cohort Study	Yes	Yes	No
15	Improving Diabetes Care Through Population Health Innovations and Payments: Lessons from Western Maryland.	Wang, Gary X.; Gauthier, Richard; Gunter, Kathryn E.; Johnson, Lori; Zhu, Mengqi; Wan, Wen; Tanumihardjo, Jacob P.; Chin, Marshall H.	2023	Research	2023	Observational cohort study	Yes	Yes	No
16	Financing Diabetes Care in the U.S. Health System: Payment Innovations for Addressing the Medical and Social Determinants of Health.	Saulsberry, Loren; Peek, Monica	2019	Research	Nov 20-2019	review	No	No	No
17	Clinical and Sociobehavioral Prediction Model of 30-Day Hospital Readmissions Among People With HIV and Substance Use Disorder: Beyond Electronic Health Record Data.	Nijhawan, Ank E.; Metsch, Lisa R.; Zhang, Song; Feaster, Daniel J.; Gooden, Lauren; Jain, Mamta K.; Walker, Robrina; Huffaker, Shannon; Mugavero, Michael J.; Jacobs, Petra; Armstrong, Wendy S.; Daar, Eric S.; Sullivan, Meg; Del Rio, Carlos; Halm, Ethan A.	2019	research	March 1, 2019.	RCT	Yes	Yes	Yes
18	Effects of a standardized community health worker intervention on hospitalization among disadvantaged patients with multiple chronic conditions: A pooled analysis of three clinical trials.	Vasan, Aditi; Morgan, John W.; Mitra, Nandita; Xu, Chang; Long, Judith A.; Asch, David A.; Kangovi, Shreya	2020	Research	2020	RCT	Yes	Yes	No
19	Screening for health-related social needs in the emergency department: Adaptability and fidelity during the COVID-19 pandemic.	Murray, Evangelia; Roosevelt, Genie E.; Vogel, Jody A.	2022	research	2021	Observational cohort study	Yes	Yes	Yes
20	Food Insecurity in Older Adults in an Integrated Health Care System	Steiner JF, Stenmark SH, Sterrett AT, Paolino AR, Stiefel M, Gozansky WS, Zeng C.	2018	research	2018	Retrospective cohort Study Yes		No	Yes
21	Development and Implementation of a Maryland State Program Providing Hospital Payment Incentives for Reduction in Readmission Disparities.	Rice, Kyle; Schuster, Alyson; Pack, Allan; Dougherty, Geoff B.	2023	research	2023	Observational study	Yes	Yes	Yes
22	Implementation fidelity to a behavioral diabetes prevention intervention in two New York City safety net primary care practices.	Gupta, Avni; Hu, Jiyuan; Huang, Shengnan; Diaz, Laura; Gore, Radhika; Levy, Natalie; Bergman, Michael; Tanner, Michael; Sherman, Scott E.; Islam, Nadia; Schwartz, Mark D.	2023	Research	2023	RCT	Yes	Yes	No (Measures intervention implementation fidelity across two sites)
23	Implementing CenteringPregnancy Group Prenatal Care for Minority Women Living with HIV at an Urban University Hospital.	Potter, JoNell E.; Duthely, Lunthita M.; Diaz-Mendez, Nelly; Smith, Lindsay; Messick, Barbara J.; Echenique, Maria; Galli, Johnny; Yasin, Salih; Villar-Loubet, Olga	2019	research	2019	Retrospective Cohort Study	Yes	Yes	No
24	Management of Isolated Skull Fractures in Pediatric Patients: A Systematic Review.	Donaldson, Katelyn; Li, Xun; Sartorelli, Kennith H.; Weimersheimer, Peter; Durham, Susan R.	2019	Review	2019	Review	Yes	Yes	Yes
25	Health Center-Based Community-Supported Agriculture: An RCT.	Berkowitz, Seth A.; O'Neill, Jessica; Sayer, Edward; Shahid, Naysha N.; Petrie, Maegan; Schouboe, Sophie; Saraceno, Megan; Bellin, Rochelle	2019	Research	2019	RCT	Yes	Yes; Healthy eating index; A1C; cholesterol; BMI	Yes; food insecurity; psychosocial outcomes
26	Effects of In-Person Assistance vs Personalized Written Resources About Social Services on Household Social Risks and Child and Caregiver Health: A Randomized Clinical Trial.	Gottlieb, Laura M.; Adler, Nancy E.; Wing, Holly; Velazquez, Denisse; Keeton, Victoria; Romero, Abigail; Hernandez, Maricarmen; Munoz Vera, Andrea; Urrutia Caceres, Elizabeth; Arevalo, Catherine; Herrera, Philip; Bernal Suarez, Mara; Hessler, Danielle	2020	Research	2020	RCT	Yes	Yes	Yes
27	Feasibility of a family-centered intervention for depressed older men in primary care.	Hinton, Ladson; La Frano, Erika; Harvey, Danielle; Alfaro, Eduardo Delgadillo; Kravitz, Richard; Smith, Andrew; Apesoa-Varano, Ester Carolina; Jafri, Asma; Unutzer, Jurgen	2019	Research	2019	RCT	Yes	Yes	No
28	Intensive care management for high-risk veterans in a patient-centered medical home - do some veterans benefit more than others?	Swankoski, Kaylyn E.; Reddy, Ashok; Grembowski, David; Chang, Evelyn T.; Wong, Edwin S.	2023	Research	2023	RCT	Yes	Yes	No
29	Pragmatic Clinical Trial to Improve Patient Experience Among Adults During Transitions from Hospital to Home: the PArTNER study.	LaBedz, Stephanie L.; Prieto-Centurion, Valentin; Mutso, Amelia; Basu, Sanjib; Bracken, Nina E.; Calhoun, Elizabeth A.; DiDomenico, Robert J.; Joo, Min; Pickard, A. Simon; Pittendrigh, Barry; Williams, Mark V.; Illendula, Sai; Krishnan, Jerry A.	2022	Research	2022	RCT	Yes	Yes	Yes
30	Medical-Legal Partnership Effects on Mental Health, Health Care Use, and Quality of Life in Primary Care: A Randomized Clinical Trial.	Liaw, Winston; Northrup, Thomas F.; Stotts, Angela L.; Bakos-Block, Christine; Suchting, Robert; Chen, Alvin; Hernandez, Abigail; Finzetto, Lisandra; Green, Charles; Murphy, Thomas	2023	Research	2023	RCT	Yes	Yes	No
31	Predictive Model-Driven Hotspotting to Decrease Emergency Department Visits: a Randomized Controlled Trial.	Post, Brady; Lapedis, Jeremy; Singh, Karandeep; Valenstein, Paul; Büyüktür, Ayşe G.; Teske, Karin; Ryan, Andrew M.	2021	Research	2021	RCT	Yes	Yes	No
32	A care coordinator screening strategy to address health harming legal needs	Berg, Daniel; Setrini, Alice; Chan, Kathy; Cibulskis, Ann; Ameji, Kulsum; Hinami, Keiki	2022	Research Article	2022-02-16	qualitative data analysis	Yes	No	Yes
33	Evidence that collaborative action between local health departments and nonprofit hospitals helps foster healthy behaviors in communities: a multilevel study	Geri Rosen Cramer; Young, Gary J; Singh, Simone; McGuire, Jean; Kim, Daniel	2021	Research Article	2021-01-02	Multilevel cross sectional study	Yes	No	Yes
34	Hospital Partnerships for Population Health: A Systematic Review of the Literature	Hilts Katy Ellis; Yeager, Valerie A; Joseph, Gibson P; Halverson, Paul K; Blackburn, Justin; Menachemi Nir	2021	Review Article	2022	Systematic Review	Yes	No	Yes
35	Medicaid Investments To Address Social Needs In Oregon And California	Alderwick, Hugh; Hood-Ronick, Carlyn M; Gottlieb, Laura M	2019	Research Article	2019	qualitative interview study	Yes	No	Yes
36	Enabling Services Improve Access To Care, Preventive Services, And Satisfaction Among Health Center Patients	Yue, Dahai; Pourat, Nadereh; Chen, Xiao; Lu, Connie; Zhou, Weihao; Daniel, Marlon; Hoang, Hank; Sripipatana, Alek; Ponce, Ninez A	2019	Research Article	2019	Survey based Cross sectional study	Yes	Yes	No
37	A Social-Return-On-Investment Analysis Of Bon Secours Hospital's 'Housing For Health' Affordable Housing Program	Drabo, Emmanuel Fulgence; Eckel, Grace; Ross, Samuel L; Brozic, Michael; Carlton, Chanie G; Warren, Tatiana Y; Kleb, George; Laird, Aurelia; Porter, Keshia M Pollack; Pollack, Craig Evan	2021	Research	2021	An evaluative retrospective SROI analysis : Mixed Methods Analytical Cross-Sectional Study	Yes	No	Yes
38	Embedding Social Workers In Veterans Health Administration Primary Care Teams Reduces Emergency Department Visits	Cornell, Portia Y; Halladay, Christopher W; Ader, Joseph; Halaszynski, Jaime; Hogue, Melinda; McClain, Cristian E; Silva, Jennifer W; Taylor, Laura D; Rudolph, James L	2020	Research	2020	Quasi-Experimental (The study utilized a quasi-experimental design, where the timing of new social workers' hiring was used as a natural experiment to evaluate the impact of adding social workers to primary care teams . The intervention was not randomly assigned, but the study design allowed for a strong quasi-experimental approach .)	Yes	Yes	No
39	Project Nurture Integrates Care And Services To Improve Outcomes For Opioid-Dependent Mothers And Their Children	McConnell, K John; Kaufman, Menolly R; Grunditz, Jenny I; Bellanca, Helen; Risser, Amanda; Rodriguez, Maria I; Renfro, Stephanie	2020	Research	2020	Quasi-Experimental	Yes	Yes	Yes
40	Addressing the Poverty Barrier in Collaborative Care for Adults Experiencing Homelessness: A Case-Based Report	Cabán-Alemán Carissa; Iobst Saraswati; Luna, Aniuska M; Foster, Adriana	2020	Case report	2020	Case series	Yes	Yes	Yes
41	Interprofessional, multitiered daily rounding management in a high-acuity hospital	Eamranond, Pracha Peter; Bhukhen, Arti; DiPalma, Donna; Schawan Kunuakaphun; Burke, Thomas; Rodis, John; Grey, Michael	2020	Case Report	2020	Explanatory case study	Yes	Yes	No
42	Indianapolis Provider's Use Of Wraparound Services Associated With Reduced Hospitalizations And Emergency Department Visits	Vest, Joshua R; Harris, Lisa E; Haut, Dawn P; Halverson, Paul K; Menachemi, Nir	2018	Research	2018	The study utilized a retrospective panel design, analyzing data from an eleven-year panel of primary care patients served by Eskenazi Health in Indianapolis, Indiana . The researchers measured the association between receiving wraparound services and subsequent hospitalizations, emergency department visits, and nonemergent ED visits	Yes	Yes	Yes
43	Reasons for Social Work Referrals in an Urban Safety-Net Population: A Natural Language Processing and Market Basket Analysis Approach.	Bako, Abdulaziz T.; Walter-McCabe, Heather; Kasthurirathne, Suranga N.; Halverson, Paul K.; Vest, Joshua R.	2021	Research	2021	Analytical cross-sectional	No	No	No
44	The Impact of Food Insecurity Screenings and Community Food Resource Referrals for Patients with Type 2 Diabetes.	Ofili, Miriam Ngozi; Lawson, Robin M.	2020	Research	2020	Prospective Cohort Study	Yes	Yes	Yes
45	The implementation cost of a safety‐net hospital program addressing social needs in Atlanta.	MacLeod, Kara E.; Chapel, John M.; McCurdy, Matthew; Minaya‐Junca, Jasmin; Wirth, Diane; Onwuanyi, Anekwe; Lane, Rashon I.	2021	Case Study	2021	Retrospective, Cross-sectional	Yes	Yes	Yes
46	Development of a homelessness risk screening tool for emergency department patients.	Doran, Kelly M.; Johns, Eileen; Zuiderveen, Sara; Shinn, Marybeth; Dinan, Kinsey; Schretzman, Maryanne; Gelberg, Lillian; Culhane, Dennis; Shelley, Donna; Mijanovich, Tod	2022	Research	2022	Prospective Cohort Study	No	No	No
47	An embedded multiple case study: using CFIR to map clinical food security screening constructs for the development of primary care practice guidelines.	Taher, Sabira; Muramatsu, Naoko; Odoms-Young, Angela; Peacock, Nadine; Michael, C. Fagen; Courtney, K. Suh	2022	Case Study	2022	Qualitative- Embedded multiple case study	Yes	No	Yes
48	Conceptualizing the effective mechanisms of a social needs case management program shown to reduce hospital use: a qualitative study.	Fleming, Mark D.; Safaeinili, Nadia; Knox, Margae; Hernandez, Elizabeth; Esteban, Emily E.; Sarkar, Urmimala; Brewster, Amanda L.	2022	Case study	2022	Qualitative case study	Yes	Yes	No
49	Social Needs Screening and Referral Program at a Large US Public Hospital System, 2017.	Berry, Carolyn; Paul, Margaret; Massar, Rachel; Marcello, Roopa Kalyanaraman; Krauskopf, Marian	2020	Research	2020	Qualitative Study	No	No	No
50	A Nurse-Led Intervention to Address Food Insecurity in Chicago.	Grenier, Jennifer; Wynn, Nicole	2018	Case report	2018	Qualitative Case Report	Yes	No	Yes
51	Training Student Volunteers as "Community Resource Navigators" to Integrate Health and Social Care in Primary Care.	Gautam, Diwas; Kutzer, Kate; Sandhu, Sahil; Dennis, Erika; Xu, Jacqueline; Blanchard, Lilian; Munoz, Veronica; Drake, Connor; Crowder, Carolyn; Eisenson, Howard; Bettger, Janet	2022	Research	2022	Qualitative Study	Yes	No	Yes
52	An In-Clinic Food Pharmacy Addresses Very Low Food Security.	Cooper, Emily; Mohanan, Sveta; Garcia, Christina; Thomas, Tamara Baldwin; Ozgun, Holly; Hernandez, Brisa; Cheng, Iris; Cole, Alisahah J.	2020	Case Report	2020	Qualitative Case Report	No	No	No
53	Evidence based processes to prevent readmissions: more is better, a ten-site observational study.	Pugh, Jacqueline; Penney, Lauren S.; Noël, Polly H.; Neller, Sean; Mader, Michael; Finley, Erin P.; Lanham, Holly J.; Leykum, Luci	2021	Research	2021	Observational study	Yes	Yes	No
54	Unmet Social Needs and No-Show Visits in Primary Care in a US Northeastern Urban Health System, 2018–2019.	Fiori, Kevin P.; Heller, Caroline G.; Rehm, Colin D.; Parsons, Amanda; Flattau, Anna; Braganza, Sandra; Lue, Kelly; Lauria, Molly; Racine, Andrew	2020	Research	2020	Cross sectional	Yes	Yes	No
55	Cooling The Hot Spots Where Child Hospitalization Rates Are High: A Neighborhood Approach To Population Health	Beck, Andrew F; Anderson, Kristy L; Rich, Kate; Taylor, Stuart C; Iyer, Srikant B; Kotagal, Uma R; Kahn, Robert S	2019	Research/Case Report	2019	Time-series	Yes	Yes; child inpatient bed days	No
56	Quantifying Health Systems' Investment In Social Determinants Of Health, By Sector, 2017–19	Horwitz, Leora I; Chang, Carol; Arcilla, Harmony N; Knickman, James R	2020	Review (gray literature)	2020	Gray literature review	Yes	N/A	Yes
57	Prescribing Housing: A Scoping Review of Health System Efforts to Address Housing as a Social Determinant of Health.	Koeman, Jamison; Mehdipanah, Roshanak	2021	Review	2021	Scoping review	Yes	N/A	Yes
58	The Baltimore Community-Based Organizations Neighborhood Network: Enhancing Capacity Together (CONNECT) Cluster RCT.	Wu, Albert W.; Weston, Christine M.; Ibe, Chidinma A.; Ruberman, Claire F.; Bone, Lee; Boonyasai, Romsai T.; Hwang, Sandra; Gentry, Janice; Purnell, Leon; Lu, Yanyan; Liang, Shuwen; Rosenblum, Michael	2019	Research	2019	RCT	Yes	Yes	Yes
59	Effect of Community Health Worker Support on Clinical Outcomes of Low-Income Patients Across Primary Care Facilities: A Randomized Clinical Trial.	Kangovi, Shreya; Mitra, Nandita; Norton, Lindsey; Harte, Rory; Zhao, Xinyi; Carter, Tamala; Grande, David; Long, Judith A.	2018	Research	2018	RCT	Yes	Yes	Yes
60	Food for Thought: A Randomized Trial of Food Insecurity Screening in the Emergency Department.	Cullen, Danielle; Woodford, Ashley; Fein, Joel	2019	Research	2019	RCT	Yes	No	Yes
61	Effect of a Peer-Led Behavioral Intervention for Emergency Department Patients at High Risk of Fatal Opioid Overdose: A Randomized Clinical Trial.	Beaudoin, Francesca L.; Jacka, Brendan P.; Li, Yu; Samuels, Elizabeth A.; Hallowell, Benjamin D.; Peachey, Alyssa M.; Newman, Roxxanne A.; Daly, Mackenzie M.; Langdon, Kirsten J.; Marshall, Brandon D. L.	2022	Research	2022-08-09	RCT	yes	yes	no
62	Patient plus partner trial: A randomized controlled trial of 2 interventions to improve outcomes after an initial implantable cardioverter-defibrillator.	Dougherty, Cynthia M.; Thompson, Elaine A.; Kudenchuk, Peter J.	2019	Research	2019 march	RCT	yes	no	Yes
63	Illustrating the value of social work: results of an open pilot trial of the psychosocial acuity scale in a large urban pediatric hospital.	Sable, Paige; Ross, Abigail; Clock, Annie; Corder, Brooke; Lamontagne, Nicole; McCaig, Jessica; Shanske, Susan; Tvedte, Matthew; Cummings, Jennifer; Chamorro, Pamela	2021	Research	2021	RCT	Yes	Yes	No
64	Using Publicly Available Data to Understand the Opioid Overdose Epidemic: Geospatial Distribution of Discarded Needles in Boston, Massachusetts	Bearnot, Benjamin, MD; Pearson, John F, MD; Rodriguez, Jorge A, MD	2018	Research	2018	Analytical cross-section/secondary analysis study	Yes	Spatiotemporal analysis of discarded needles	No
65	Predictors for Poor Linkage to Care Among Hospitalized Persons Living with HIV and Co-Occurring Substance Use Disorder.	Summers, Nathan A.; Colasanti, Jonathan A.; Feaster, Daniel J.; Armstrong, Wendy S.; Rodriguez, Allan; Jain, Mamta K.; Jacobs, Petra; Metsch, Lisa R.; Del Rio, Carlos	2020	Research	2020	RCT	Yes	Yes	No
66	Enhanced care planning and clinical-community linkages versus usual care to address basic needs of patients with multiple chronic conditions: a clinician-level randomized controlled trial.	Krist, Alex H.; O'Loughlin, Kristen; Woolf, Steven H.; Sabo, Roy T.; Hinesley, Jennifer; Kuzel, Anton J.; Rybarczyk, Bruce D.; Kashiri, Paulette Lail; Brooks, E. Marshall; Glasgow, Russel E.; Huebschmann, Amy G.; Liaw, Winston R.	2020	Research	2020	RCT	Yes	Yes	Yes, healthy behaviors; diet captured
67	Social Risks Among Primary Care Patients in a Large Urban Health System.	Heller, Caroline G.; Parsons, Amanda S.; Chambers, Earle C.; Fiori, Kevin P.; Rehm, Colin D.	2020	Research Article	2020	Descriptive, Cross-sectional study	No	No	No
68	Relationship of Neighborhood Deprivation and Outcomes of a Comprehensive ST-Segment-Elevation Myocardial Infarction Protocol.	Huded, Chetan P.; Dalton, Jarrod E.; Kumar, Anirudh; Krieger, Nikolas I.; Kassis, Nicholas; Phelan, Michael; Kravitz, Kathleen; Reed, Grant W.; Krishnaswamy, Amar; Kapadia, Samir R.; Khot, Umesh	2021	Research Article	2021	Observational cohort study	Yes	Yes	No
69	Enhancing Reach Out and Read With a Video and Text Messages: A Randomized Trial in a Low-Income Predominantly Latino Sample.	Jimenez, Manuel E.; Crabtree, Benjamin F.; Hudson, Shawna V.; Mendelsohn, Alan L.; Lima, Daniel; Shelton, Patricia A.; Veras, Julissa; Lin, Yong; Pellerano, Maria; Morrow, Lesley; Strom, Brian L.	2021	Research	2021	RCT	Yes	No	Yes
70	Social Needs Screening in Hospitalized Pediatric Patients: A Randomized Controlled Trial.	Lopez, Michelle A.; Yu, Xian; Hetrick, Rebecca; Raman, Shivani; Lee, Jessica; Hall, Julie; Tran, Katherine; Vonasek, Bryan; Garg, Arvin; Raphael, Jean; Bocchini, Claire	2023	Research	2023	RCT	Yes	No	Yes

## Sheet: Additional Coding
Record #	Article Name	Author	Year	Upstream Vs Downstream	Screening and Referral Vs Neighborhood Hot Spotting	Internal Capacity Vs Community Partnerships	Quality Improvement Vs Population Health Management
1	Missed psychosocial risk factors during routine preoperative evaluations are associated with increased complications after elective cancer surgery.	Meyers, Patrick M.; Leeds, Ira L.; Enumah, Zachary O.; Burkhart, Richard A.; He, Jin; Haut, Elliott R.; Efron, Jonathan E.; Johnston, Fabian M.	2019	Downstream	Screening and Referral	Internal Capacity	Quality Improvement
2	Outpatient Palliative Care for Noncancer Illnesses: One Program's Experience with Implementation, Impact, and Lessons Learned.	Bischoff, Kara E.; Lin, Joseph; Cohen, Eve; O'Riordan, David L.; Meister, Sarah; Zapata, Carly; Sicotte, Jeffrey; Lindenfeld, Paul; Calton, Brook; Pantilat, Steven Z.	2022	Downstream	Hot Spotting	Internal Capacity	Quality Improvement
3	Financial Incentives for Smoking Cessation in Hospitalized Patients: A Randomized Clinical Trial.	Ladapo, Joseph A.; Tseng, Chi-Hong; Sherman, Scott E.	2020	Downstream	Hot Spotting	Mixed	Mixed
4	Real-World Disparities in Remote Follow-Up of Cardiac Implantable Electronic Devices and Impact of the COVID-19 Pandemic: A Single-Center Experience.	Lehmann, H. Immo; Sharma, Krishan; Bhatia, Roma; Mills, Theresa; Lang, Joshua; Li, Guoping; Andrews, Carl; Cullivan, Jay; Singh, Jagmeet; Mela, Theofanie	2023	Downstream	Hot Spotting	Mixed	Mixed
5	Implementing an EHR-based Screening and Referral System to Address Social Determinants of Health in Primary Care.	Buitron de la Vega, Pablo; Losi, Stephanie; Sprague Martinez, Linda; Bovell-Ammon, Allison; Garg, Arvin; James, Thea; Ewen, Alana M.; Stack, Marna; DeCarvalho, Heloisa; Sandel, Megan; Mishuris, Rebecca G.; Deych, Stella; Pelletier, Patrick; Kressin, Nancy R.	2019	Downstream	Screening and Referral	Internal Capacity	Quality Improvement
6	Documentation and review of social determinants of health data in the EHR: measures and associated insights.	Wang, Michael; Pantell, Matthew S.; Gottlieb, Laura M.; Adler-Milstein, Julia	2021	Downstream	Screening and Referral	Internal Capacity	Quality Improvement
7	Effect of Community Health Workers on 30-Day Hospital Readmissions in an Accountable Care Organization Population: A Randomized Clinical Trial.	Carter, Jocelyn; Hassan, Susan; Walton, Anne; Yu, Liyang; Donelan, Karen; Thorndike, Anne N.	2021	Downstream	Hot Spotting	Internal Capacity	Population Health Management
8	The impact of enhancing self-management support for diabetes in Community Health Centers through patient engagement and relationship building: a primary care pragmatic cluster-randomized trial.	Hessler, Danielle; Fisher, Lawrence; Dickinson, Miriam; Dickinson, Perry; Parra, José; Potter, Michael B.	2022	Downstream	Hot Spotting	Mixed	Mixed
9	Online Telehealth Delivery of Group Mental Health Treatment Is Safe, Feasible, and Increases Enrollment and Attendance in Post-9/11 U.S. Veterans.	Fortier, Catherine B.; Currao, Alyssa; Kenna, Alexandra; Kim, Sahra; Beck, Brigitta M.; Katz, Dylan; Hursh, Colleen; Fonda, Jennifer R.	2022	Downstream	Hot Spotting	Internal Capacity	Mixed
10	Computerized Intervention in Primary Care for Women Veterans with Sexual Assault Histories and Psychosocial Health Risks: a Randomized Clinical Trial.	Creech, Suzannah K.; Pulverman, Carey S.; Kahler, Christopher W.; Orchowski, Lindsay M.; Shea, M. Tracie; Wernette, Golfo Tzilos; Zlotnick, Caron	2022	Downstream	Hot Spotting	Internal Capacity	Mixed
11	Bridge to Health/Puente a la Salud: a pilot randomized trial to address diabetes self-management and social needs among high-risk patients.	Fitzpatrick, Stephanie L.; Papajorgji-Taylor, Dea; Schneider, Jennifer L.; Lindberg, Nangel; Francisco, Melanie; Smith, Ning; Vaughn, Katie; Vrany, Elizabeth A.; Hill-Briggs, Felicia	2022	Mixed	Hot Spotting	Mixed	Mixed
12	Impact of a Low-Intensity Resource Referral Intervention on Patients' Knowledge, Beliefs, and Use of Community Resources: Results from the CommunityRx Trial.	Tung, Elizabeth L.; Abramsohn, Emily M.; Boyd, Kelly; Makelarski, Jennifer A.; Beiser, David G.; Chou, Chiahung; Huang, Elbert S.; Ozik, Jonathan; Kaligotla, Chaitanya; Lindau, Stacy Tessler	2020	Downstream	Screening and Referral	Mixed	Population Health Management
13	Patient navigation to address sociolegal barriers for patients with cancer: A comparative-effectiveness study.	Battaglia, Tracy A.; Gunn, Christine M.; Bak, Sharon M.; Flacks, JoHanna; Nelson, Kerrie P.; Wang, Na; Ko, Naomi Y.; Morton, Samantha J.	2022	Downstream	Screening and Referral	Internal Capacity	Quality Improvement
14	Nurse-led hospital-to-community care, clinical outcomes for people living with HIV and health-related social needs	Moen, Marik; Doede, Megan; Johantgen, Meg; Taber, Deborah; Adesanya, Ikmat; Werthman, Emily; Friedmann, Erika	2022	Downstream	Screening and Referral	Internal Capacity	Mixed
15	Improving Diabetes Care Through Population Health Innovations and Payments: Lessons from Western Maryland.	Wang, Gary X.; Gauthier, Richard; Gunter, Kathryn E.; Johnson, Lori; Zhu, Mengqi; Wan, Wen; Tanumihardjo, Jacob P.; Chin, Marshall H.	2023	Mixed	Hot Spotting	Internal Capacity	Mixed
16	Financing Diabetes Care in the U.S. Health System: Payment Innovations for Addressing the Medical and Social Determinants of Health.	Saulsberry, Loren; Peek, Monica	2019	Mixed	Hot Spotting	Internal Capacity	Population Health Management
17	Clinical and Sociobehavioral Prediction Model of 30-Day Hospital Readmissions Among People With HIV and Substance Use Disorder: Beyond Electronic Health Record Data.	Nijhawan, Ank E.; Metsch, Lisa R.; Zhang, Song; Feaster, Daniel J.; Gooden, Lauren; Jain, Mamta K.; Walker, Robrina; Huffaker, Shannon; Mugavero, Michael J.; Jacobs, Petra; Armstrong, Wendy S.; Daar, Eric S.; Sullivan, Meg; Del Rio, Carlos; Halm, Ethan A.	2019	Downstream	Hot Spotting	Internal Capacity	Population Health Management
18	Effects of a standardized community health worker intervention on hospitalization among disadvantaged patients with multiple chronic conditions: A pooled analysis of three clinical trials.	Vasan, Aditi; Morgan, John W.; Mitra, Nandita; Xu, Chang; Long, Judith A.; Asch, David A.; Kangovi, Shreya	2020	Downstream	Hot Spotting	Internal Capacity	Population Health Management
19	Screening for health-related social needs in the emergency department: Adaptability and fidelity during the COVID-19 pandemic.	Murray, Evangelia; Roosevelt, Genie E.; Vogel, Jody A.	2022	Downstream	Screening and Referral	Internal Capacity	Quality Improvement
20	Food Insecurity in Older Adults in an Integrated Health Care System	Steiner JF, Stenmark SH, Sterrett AT, Paolino AR, Stiefel M, Gozansky WS, Zeng C.	2018	Mixed	Hot Spotting	Mixed	Population Health Management
21	Development and Implementation of a Maryland State Program Providing Hospital Payment Incentives for Reduction in Readmission Disparities.	Rice, Kyle; Schuster, Alyson; Pack, Allan; Dougherty, Geoff B.	2023	Downstream	Hot Spotting	Internal Capacity	Mixed
22	Implementation fidelity to a behavioral diabetes prevention intervention in two New York City safety net primary care practices.	Gupta, Avni; Hu, Jiyuan; Huang, Shengnan; Diaz, Laura; Gore, Radhika; Levy, Natalie; Bergman, Michael; Tanner, Michael; Sherman, Scott E.; Islam, Nadia; Schwartz, Mark D.	2023	Downstream	Hot Spotting	Mixed	Mixed
23	Implementing CenteringPregnancy Group Prenatal Care for Minority Women Living with HIV at an Urban University Hospital.	Potter, JoNell E.; Duthely, Lunthita M.; Diaz-Mendez, Nelly; Smith, Lindsay; Messick, Barbara J.; Echenique, Maria; Galli, Johnny; Yasin, Salih; Villar-Loubet, Olga	2019	Downstream	Hot Spotting	Internal Capacity	Mixed
24	Management of Isolated Skull Fractures in Pediatric Patients: A Systematic Review.	Donaldson, Katelyn; Li, Xun; Sartorelli, Kennith H.; Weimersheimer, Peter; Durham, Susan R.	2019	Downstream	Hot Spotting	Internal Capacity	Quality Improvement
25	Health Center-Based Community-Supported Agriculture: An RCT.	Berkowitz, Seth A.; O'Neill, Jessica; Sayer, Edward; Shahid, Naysha N.; Petrie, Maegan; Schouboe, Sophie; Saraceno, Megan; Bellin, Rochelle	2019	Upstream	Hot Spotting	Community Partnerships	Population Health Management
26	Effects of In-Person Assistance vs Personalized Written Resources About Social Services on Household Social Risks and Child and Caregiver Health: A Randomized Clinical Trial.	Gottlieb, Laura M.; Adler, Nancy E.; Wing, Holly; Velazquez, Denisse; Keeton, Victoria; Romero, Abigail; Hernandez, Maricarmen; Munoz Vera, Andrea; Urrutia Caceres, Elizabeth; Arevalo, Catherine; Herrera, Philip; Bernal Suarez, Mara; Hessler, Danielle	2020	Downstream	Hot Spotting	Mixed	Population Health Management
27	Feasibility of a family-centered intervention for depressed older men in primary care.	Hinton, Ladson; La Frano, Erika; Harvey, Danielle; Alfaro, Eduardo Delgadillo; Kravitz, Richard; Smith, Andrew; Apesoa-Varano, Ester Carolina; Jafri, Asma; Unutzer, Jurgen	2019	Downstream	Hot Spotting	Mixed	Population Health Management
28	Intensive care management for high-risk veterans in a patient-centered medical home - do some veterans benefit more than others?	Swankoski, Kaylyn E.; Reddy, Ashok; Grembowski, David; Chang, Evelyn T.; Wong, Edwin S.	2023	Downstream	Hot Spotting	Internal Capacity	Mixed
29	Pragmatic Clinical Trial to Improve Patient Experience Among Adults During Transitions from Hospital to Home: the PArTNER study.	LaBedz, Stephanie L.; Prieto-Centurion, Valentin; Mutso, Amelia; Basu, Sanjib; Bracken, Nina E.; Calhoun, Elizabeth A.; DiDomenico, Robert J.; Joo, Min; Pickard, A. Simon; Pittendrigh, Barry; Williams, Mark V.; Illendula, Sai; Krishnan, Jerry A.	2022	Downstream	Hot Spotting	Mixed	Quality Improvement
30	Medical-Legal Partnership Effects on Mental Health, Health Care Use, and Quality of Life in Primary Care: A Randomized Clinical Trial.	Liaw, Winston; Northrup, Thomas F.; Stotts, Angela L.; Bakos-Block, Christine; Suchting, Robert; Chen, Alvin; Hernandez, Abigail; Finzetto, Lisandra; Green, Charles; Murphy, Thomas	2023	Mixed	Hot Spotting	Mixed	Population Health Management
31	Predictive Model-Driven Hotspotting to Decrease Emergency Department Visits: a Randomized Controlled Trial.	Post, Brady; Lapedis, Jeremy; Singh, Karandeep; Valenstein, Paul; Büyüktür, Ayşe G.; Teske, Karin; Ryan, Andrew M.	2021	Downstream	Hot Spotting	Mixed	Population Health Management
32	A care coordinator screening strategy to address health harming legal needs	Berg, Daniel; Setrini, Alice; Chan, Kathy; Cibulskis, Ann; Ameji, Kulsum; Hinami, Keiki	2022	Downstream	Screening and Referral	Mixed	Population Health Management
33	Evidence that collaborative action between local health departments and nonprofit hospitals helps foster healthy behaviors in communities: a multilevel study	Geri Rosen Cramer; Young, Gary J; Singh, Simone; McGuire, Jean; Kim, Daniel	2021	Upstream	Hot Spotting	Community Partnerships	Population Health Management
34	Hospital Partnerships for Population Health: A Systematic Review of the Literature	Hilts Katy Ellis; Yeager, Valerie A; Joseph, Gibson P; Halverson, Paul K; Blackburn, Justin; Menachemi Nir	2021	Upstream	Hot Spotting	Community Partnerships	Population Health Management
35	Medicaid Investments To Address Social Needs In Oregon And California	Alderwick, Hugh; Hood-Ronick, Carlyn M; Gottlieb, Laura M	2019	Upstream	Hot Spotting	Mixed	Population Health Management
36	Enabling Services Improve Access To Care, Preventive Services, And Satisfaction Among Health Center Patients	Yue, Dahai; Pourat, Nadereh; Chen, Xiao; Lu, Connie; Zhou, Weihao; Daniel, Marlon; Hoang, Hank; Sripipatana, Alek; Ponce, Ninez A	2019	Mixed	Hot Spotting	Mixed	Population Health Management
37	A Social-Return-On-Investment Analysis Of Bon Secours Hospital's 'Housing For Health' Affordable Housing Program	Drabo, Emmanuel Fulgence; Eckel, Grace; Ross, Samuel L; Brozic, Michael; Carlton, Chanie G; Warren, Tatiana Y; Kleb, George; Laird, Aurelia; Porter, Keshia M Pollack; Pollack, Craig Evan	2021	Upstream	Hot Spotting	Internal Capacity	Population Health Management
38	Embedding Social Workers In Veterans Health Administration Primary Care Teams Reduces Emergency Department Visits	Cornell, Portia Y; Halladay, Christopher W; Ader, Joseph; Halaszynski, Jaime; Hogue, Melinda; McClain, Cristian E; Silva, Jennifer W; Taylor, Laura D; Rudolph, James L	2020	Downstream	Hot Spotting	Internal Capacity	Mixed
39	Project Nurture Integrates Care And Services To Improve Outcomes For Opioid-Dependent Mothers And Their Children	McConnell, K John; Kaufman, Menolly R; Grunditz, Jenny I; Bellanca, Helen; Risser, Amanda; Rodriguez, Maria I; Renfro, Stephanie	2020	Downstream	Hot Spotting	Mixed	Mixed
40	Addressing the Poverty Barrier in Collaborative Care for Adults Experiencing Homelessness: A Case-Based Report	Cabán-Alemán Carissa; Iobst Saraswati; Luna, Aniuska M; Foster, Adriana	2020	Mixed	Hot Spotting	Internal Capacity	Population Health Management
41	Interprofessional, multitiered daily rounding management in a high-acuity hospital	Eamranond, Pracha Peter; Bhukhen, Arti; DiPalma, Donna; Schawan Kunuakaphun; Burke, Thomas; Rodis, John; Grey, Michael	2020	Downstream	Hot Spotting	Internal Capacity	Mixed
42	Indianapolis Provider's Use Of Wraparound Services Associated With Reduced Hospitalizations And Emergency Department Visits	Vest, Joshua R; Harris, Lisa E; Haut, Dawn P; Halverson, Paul K; Menachemi, Nir	2018	Downstream	Hot Spotting	Internal Capacity	Mixed
43	Reasons for Social Work Referrals in an Urban Safety-Net Population: A Natural Language Processing and Market Basket Analysis Approach.	Bako, Abdulaziz T.; Walter-McCabe, Heather; Kasthurirathne, Suranga N.; Halverson, Paul K.; Vest, Joshua R.	2021	Downstream	Screening and Referral	Internal Capacity	Population Health Management
44	The Impact of Food Insecurity Screenings and Community Food Resource Referrals for Patients with Type 2 Diabetes.	Ofili, Miriam Ngozi; Lawson, Robin M.	2020	Downstream	Screening and Referral	Mixed	Mixed
45	The implementation cost of a safety‐net hospital program addressing social needs in Atlanta.	MacLeod, Kara E.; Chapel, John M.; McCurdy, Matthew; Minaya‐Junca, Jasmin; Wirth, Diane; Onwuanyi, Anekwe; Lane, Rashon I.	2021	Downstream	Screening and Referral	Internal Capacity	Population Health Management
46	Development of a homelessness risk screening tool for emergency department patients.	Doran, Kelly M.; Johns, Eileen; Zuiderveen, Sara; Shinn, Marybeth; Dinan, Kinsey; Schretzman, Maryanne; Gelberg, Lillian; Culhane, Dennis; Shelley, Donna; Mijanovich, Tod	2022	Downstream	Screening and Referral	Internal Capacity	Quality Improvement
47	An embedded multiple case study: using CFIR to map clinical food security screening constructs for the development of primary care practice guidelines.	Taher, Sabira; Muramatsu, Naoko; Odoms-Young, Angela; Peacock, Nadine; Michael, C. Fagen; Courtney, K. Suh	2022	Mixed	Screening and Referral	Mixed	Quality Improvement
48	Conceptualizing the effective mechanisms of a social needs case management program shown to reduce hospital use: a qualitative study.	Fleming, Mark D.; Safaeinili, Nadia; Knox, Margae; Hernandez, Elizabeth; Esteban, Emily E.; Sarkar, Urmimala; Brewster, Amanda L.	2022	Downstream	Hot Spotting	Mixed	Population Health Management
49	Social Needs Screening and Referral Program at a Large US Public Hospital System, 2017.	Berry, Carolyn; Paul, Margaret; Massar, Rachel; Marcello, Roopa Kalyanaraman; Krauskopf, Marian	2020	Downstream	Screening and Referral	Internal Capacity	Mixed
50	A Nurse-Led Intervention to Address Food Insecurity in Chicago.	Grenier, Jennifer; Wynn, Nicole	2018	Downstream	Hot Spotting	Internal Capacity	Population Health Management
51	Training Student Volunteers as "Community Resource Navigators" to Integrate Health and Social Care in Primary Care.	Gautam, Diwas; Kutzer, Kate; Sandhu, Sahil; Dennis, Erika; Xu, Jacqueline; Blanchard, Lilian; Munoz, Veronica; Drake, Connor; Crowder, Carolyn; Eisenson, Howard; Bettger, Janet	2022	Downstream	Hot Spotting	Mixed	Population Health Management
52	An In-Clinic Food Pharmacy Addresses Very Low Food Security.	Cooper, Emily; Mohanan, Sveta; Garcia, Christina; Thomas, Tamara Baldwin; Ozgun, Holly; Hernandez, Brisa; Cheng, Iris; Cole, Alisahah J.	2020	Downstream	Hot Spotting	Internal Capacity	Mixed
53	Evidence based processes to prevent readmissions: more is better, a ten-site observational study.	Pugh, Jacqueline; Penney, Lauren S.; Noël, Polly H.; Neller, Sean; Mader, Michael; Finley, Erin P.; Lanham, Holly J.; Leykum, Luci	2021	Downstream	Hot Spotting	Internal Capacity	Mixed
54	Unmet Social Needs and No-Show Visits in Primary Care in a US Northeastern Urban Health System, 2018–2019.	Fiori, Kevin P.; Heller, Caroline G.; Rehm, Colin D.; Parsons, Amanda; Flattau, Anna; Braganza, Sandra; Lue, Kelly; Lauria, Molly; Racine, Andrew	2020	Downstream	Screening and Referral	Internal Capacity	Mixed
55	Cooling The Hot Spots Where Child Hospitalization Rates Are High: A Neighborhood Approach To Population Health	Beck, Andrew F; Anderson, Kristy L; Rich, Kate; Taylor, Stuart C; Iyer, Srikant B; Kotagal, Uma R; Kahn, Robert S	2019	Downstream	Hot Spotting	Internal Capacity	Population Health Management
56	Quantifying Health Systems' Investment In Social Determinants Of Health, By Sector, 2017–19	Horwitz, Leora I; Chang, Carol; Arcilla, Harmony N; Knickman, James R	2020	Upstream	Hot Spotting	Mixed	Population Health Management
57	Prescribing Housing: A Scoping Review of Health System Efforts to Address Housing as a Social Determinant of Health.	Koeman, Jamison; Mehdipanah, Roshanak	2021	Mixed	Hot Spotting	Mixed	Population Health Management
58	The Baltimore Community-Based Organizations Neighborhood Network: Enhancing Capacity Together (CONNECT) Cluster RCT.	Wu, Albert W.; Weston, Christine M.; Ibe, Chidinma A.; Ruberman, Claire F.; Bone, Lee; Boonyasai, Romsai T.; Hwang, Sandra; Gentry, Janice; Purnell, Leon; Lu, Yanyan; Liang, Shuwen; Rosenblum, Michael	2019	Mixed	Hot Spotting	Mixed	Population Health Management
59	Effect of Community Health Worker Support on Clinical Outcomes of Low-Income Patients Across Primary Care Facilities: A Randomized Clinical Trial.	Kangovi, Shreya; Mitra, Nandita; Norton, Lindsey; Harte, Rory; Zhao, Xinyi; Carter, Tamala; Grande, David; Long, Judith A.	2018	Downstream	Hot Spotting	Internal Capacity	Mixed
60	Food for Thought: A Randomized Trial of Food Insecurity Screening in the Emergency Department.	Cullen, Danielle; Woodford, Ashley; Fein, Joel	2019	Downstream	Screening and Referral	Internal Capacity	Mixed
61	Effect of a Peer-Led Behavioral Intervention for Emergency Department Patients at High Risk of Fatal Opioid Overdose: A Randomized Clinical Trial.	Beaudoin, Francesca L.; Jacka, Brendan P.; Li, Yu; Samuels, Elizabeth A.; Hallowell, Benjamin D.; Peachey, Alyssa M.; Newman, Roxxanne A.; Daly, Mackenzie M.; Langdon, Kirsten J.; Marshall, Brandon D. L.	2022	Downstream	Hot Spotting	Mixed	Mixed
62	Patient plus partner trial: A randomized controlled trial of 2 interventions to improve outcomes after an initial implantable cardioverter-defibrillator.	Dougherty, Cynthia M.; Thompson, Elaine A.; Kudenchuk, Peter J.	2019	Downstream	Hot Spotting	Internal Capacity	Quality Improvement
63	Illustrating the value of social work: results of an open pilot trial of the psychosocial acuity scale in a large urban pediatric hospital.	Sable, Paige; Ross, Abigail; Clock, Annie; Corder, Brooke; Lamontagne, Nicole; McCaig, Jessica; Shanske, Susan; Tvedte, Matthew; Cummings, Jennifer; Chamorro, Pamela	2021	Downstream	Screening and Referral	Internal Capacity	Quality Improvement
64	Using Publicly Available Data to Understand the Opioid Overdose Epidemic: Geospatial Distribution of Discarded Needles in Boston, Massachusetts	Bearnot, Benjamin, MD; Pearson, John F, MD; Rodriguez, Jorge A, MD	2018	Downstream	Hot Spotting	Internal Capacity	Population Health Management
65	Predictors for Poor Linkage to Care Among Hospitalized Persons Living with HIV and Co-Occurring Substance Use Disorder.	Summers, Nathan A.; Colasanti, Jonathan A.; Feaster, Daniel J.; Armstrong, Wendy S.; Rodriguez, Allan; Jain, Mamta K.; Jacobs, Petra; Metsch, Lisa R.; Del Rio, Carlos	2020	Downstream	Hot Spotting	Internal Capacity	Mixed
66	Enhanced care planning and clinical-community linkages versus usual care to address basic needs of patients with multiple chronic conditions: a clinician-level randomized controlled trial.	Krist, Alex H.; O'Loughlin, Kristen; Woolf, Steven H.; Sabo, Roy T.; Hinesley, Jennifer; Kuzel, Anton J.; Rybarczyk, Bruce D.; Kashiri, Paulette Lail; Brooks, E. Marshall; Glasgow, Russel E.; Huebschmann, Amy G.; Liaw, Winston R.	2020	Downstream	Hot Spotting	Internal Capacity	Mixed
67	Social Risks Among Primary Care Patients in a Large Urban Health System.	Heller, Caroline G.; Parsons, Amanda S.; Chambers, Earle C.; Fiori, Kevin P.; Rehm, Colin D.	2020	Mixed	Hot Spotting	Internal Capacity	Population Health Management
68	Relationship of Neighborhood Deprivation and Outcomes of a Comprehensive ST-Segment-Elevation Myocardial Infarction Protocol.	Huded, Chetan P.; Dalton, Jarrod E.; Kumar, Anirudh; Krieger, Nikolas I.; Kassis, Nicholas; Phelan, Michael; Kravitz, Kathleen; Reed, Grant W.; Krishnaswamy, Amar; Kapadia, Samir R.; Khot, Umesh	2021	Mixed	Hot Spotting	Internal Capacity	Mixed
69	Enhancing Reach Out and Read With a Video and Text Messages: A Randomized Trial in a Low-Income Predominantly Latino Sample.	Jimenez, Manuel E.; Crabtree, Benjamin F.; Hudson, Shawna V.; Mendelsohn, Alan L.; Lima, Daniel; Shelton, Patricia A.; Veras, Julissa; Lin, Yong; Pellerano, Maria; Morrow, Lesley; Strom, Brian L.	2021	Downstream	Hot Spotting	Internal Capacity	Mixed
70	Social Needs Screening in Hospitalized Pediatric Patients: A Randomized Controlled Trial.	Lopez, Michelle A.; Yu, Xian; Hetrick, Rebecca; Raman, Shivani; Lee, Jessica; Hall, Julie; Tran, Katherine; Vonasek, Bryan; Garg, Arvin; Raphael, Jean; Bocchini, Claire	2023	Downstream	Screening and Referral	Mixed	Mixed
